# Supplementary material for: Moderate-to-severe asthma in individuals of European ancestry: a genome-wide association study
Source: PubMed Central journal article supplement (PMC6314966; doi:10.1016/s2213-2600(18)30389-8), 2019-01
Supplement: mmc1.pdf [file mmc1.pdf]

# THE LANCET

## Respiratory Medicine

### Supplementary appendix

This appendix formed part of the original submission and has been peer reviewed. We post it as supplied by the authors.

Supplement to: Shrine N, Portelli MA, John C, et al. Moderate-to-severe asthma in individuals of European ancestry: a genome-wide association study. *Lancet Respir Med* 2018; published online Dec 11. [http://dx.doi.org/10.1016/S2213-2600\(18\)30389-8](http://dx.doi.org/10.1016/S2213-2600(18)30389-8).

# Supplementary Material

## Stage 1 case and control selection

### *Genotyping quality control*

In each genotyping batch samples were excluded: (i) if their genetically inferred sex didn't match their sex in the sample manifest; (ii) if they had outlying heterozygosity within the batch (outside either 2 or 3 standard deviations from the mean depending on batch); (iii) if they had a call rate < 95% across genotyped variants; (iv) if cryptically related to another sample (2<sup>nd</sup> degree related or higher using IBD estimates calculated by PLINK 1.90), 1 sample of the pair was removed; (v) if the sample shows significant deviation from European ancestry as determined by a plot of the first two principal components calculated using EIGENSOFT 6.1.4.

### *Genetics of Asthma Phenotypes & Severity (GASP) cases for stage 1*

Moderate-severe asthma cases were recruited as part of GASP defined as moderate-severe asthma as per the British Thoracic Society (BTS) guidelines (2014) and the British National Formulary (September 2015) essentially as previously described<sup>1</sup>. We recruited adult subjects with asthma (age 16-60) from eight UK centres; Nottingham (recruited 1990-2015), Belfast (recruited 2008-2009), Birmingham (2005-2014), Cumbria (recruited 2013-2015), Manchester (recruited 2008-2014), Southampton (recruited 2003-2014), Glasgow (recruited 2002-2014) and Leicester (recruited 2004-2015). 2,976 GASP samples were genotyped, 744 using the Affymetrix Axiom® UK BiLEVE array and 2,232 with the Affymetrix Axiom® UK Biobank array. 688 samples failed genotyping quality control, leaving 2,288 samples in the genotype imputation. Out of the 2,288 samples in the genotype imputation 1 was excluded for relatedness and 429 did not meet the criteria for moderate-severe asthma leaving 1,858 cases in the analysis.

### *Unbiased BIOMarkers in PREDiction of respiratory disease outcomes (U-BIOPRED) cases and controls for stage 1*

Recruitment to the U-BIOPRED cohort involved 16 clinical centres in 11 European countries and has been described in detail<sup>2</sup> (recruited 2013-2015). 755 U-BIOPRED samples were genotyped on the Affymetrix Axiom® UK Biobank array. Following quality control, 281 U-BIOPRED cases (as per criteria described for GASP) and 75 controls were included in stage 1.

### *Selection of UK Biobank cases for stage 1*

Genotyping data was available from UK Biobank for 152,729 of the 502,682 individuals recruited by UK Biobank (May 2015 interim release). 480 individuals were removed as recommended by UK Biobank for outlying genome-wide heterozygosity or having more than 5% missing genetic data. 6,656 individuals were excluded as non-European ancestry (data field 21000 – values other than 1, 1001, 1002, 1003).

Moderate-severe asthma subjects were selected from UK Biobank under the following criteria; Asthma – doctor diagnosis (data field 6152), Exclude doctor diagnosed Emphysema/chronic bronchitis (data field 6152) and moderate-severe asthma based on British Thoracic Society (BTS) guidelines (2014) and the British National Formulary (September 2015) (data field 20003). From 146,073 European ancestry individuals available in the first release of UK Biobank genetic data, 18,010 subjects recorded yes to doctor diagnosed asthma and 3,105 met the criteria for moderate-severe asthma, 2,996 of which passed genotyping quality control.

### *Defining moderate-severe asthma*

For the GASP and U-BIOPRED cohorts recruited from secondary care in specialist respiratory centres moderate-severe asthma definition was as per the BTS guidelines (2014) and the British National Formulary (September 2015) and was defined by the collaborating centre, i.e. BTS stage 3-5 criteria; i.e. for Stage 3 taking - long acting  $\beta_2$  agonist, plus inhaled corticosteroid (ICS), Stage 4 – higher dose ICS and addition of a fourth drug e.g. leukotriene receptor antagonist, SR theophylline, and Stage 5 – oral corticosteroid (OCS) and/or Omalizumab.

In UK Biobank cases were defined by (i) having doctor diagnosed asthma, (ii) taking medication for asthma, (iii) exclusion of doctor diagnosed emphysema/chronic bronchitis and (iv) meeting the definition of moderate-severe asthma using British Thoracic Society (BTS) criteria. Cases were therefore selected from individuals for whom medication information was available and who met BTS stage 3-5 criteria as outlined.

Medicines relevant to all asthma subjects and those used to identify moderate-severe asthma in UK Biobank are listed below.

**Medicines relevant to all asthma diagnosed subjects including UKB id code**

|            |                                                           |
|------------|-----------------------------------------------------------|
| 1140855298 | salbulin 2mg tablet                                       |
| 1140855302 | salbulin 2mg/2ml liquid                                   |
| 1140855304 | salbuvent 2mg tablet                                      |
| 1140855308 | salbuvent 2mg/5ml syrup                                   |
| 1140855372 | asmaven 100micrograms inhaler                             |
| 1140855374 | cobutolin 100micrograms inhaler                           |
| 1140855376 | aerolin-400 100micrograms inhaler                         |
| 1140855380 | salbuvent 100micrograms inhaler                           |
| 1140855384 | salbuvent 5mg/ml respirator solution                      |
| 1140855390 | monovent 5mg tablet                                       |
| 1140855466 | bextasol 100micrograms inhaler                            |
| 1140855500 | asma-vydrin spray                                         |
| 1140855508 | bronchilator inhaler                                      |
| 1140855520 | duo-autohaler inhaler                                     |
| 1140855524 | iso-brovon pressurised inhaler                            |
| 1140855528 | medihaler duo inhaler                                     |
| 1140855534 | rybar no-1 inhaler                                        |
| 1140855536 | rybar no-2 inhaler                                        |
| 1140855538 | taumasthman tablet                                        |
| 1140861996 | salbulin 100micrograms inhaler                            |
| 1140861998 | ventolin 100micrograms inhaler                            |
| 1140862008 | steri-neb salamol 2.5mg/2.5ml nebulisation unit           |
| 1140862016 | ventodisks 200micrograms/blister disks+diskhaler          |
| 1140862060 | ventolin 2mg tablet                                       |
| 1140862066 | volmax 4mg m/r tablet                                     |
| 1140862070 | ventolin cr 4mg m/r tablet                                |
| 1140862086 | salamol 100micrograms inhaler                             |
| 1140862110 | berotec 100 inhaler                                       |
| 1140862118 | pirbuterol                                                |
| 1140862120 | exirel 10mg capsule                                       |
| 1140862124 | exirel 200micrograms inhaler                              |
| 1140862134 | bronchodil 500micrograms inhaler                          |
| 1140862140 | pulmadil 200micrograms inhaler                            |
| 1140862380 | becloforte 250micrograms inhaler                          |
| 1140862382 | becotide 50 inhaler                                       |
| 1140862406 | filair 50 inhaler                                         |
| 1140862476 | beclazone 50 inhaler                                      |
| 1140862526 | sodium cromoglycate                                       |
| 1140862532 | intal 5mg inhaler                                         |
| 1140862560 | ventide inhaler                                           |
| 1140862572 | budesonide                                                |
| 1140862574 | pulmicort ls 50micrograms inhaler                         |
| 1140862584 | pulmicort ls 50micrograms spacer inhaler                  |
| 1140862600 | cromogen 5mg inhaler                                      |
| 1140862610 | aerocrom inhaler                                          |
| 1140881856 | salbutamol                                                |
| 1141157418 | budesonide product                                        |
| 1141157486 | salbutamol product                                        |
| 1141195280 | novolizer budesonide 200micrograms/dose cartridge+inhaler |

## Medicines identifying moderate-severe asthma including UKB id code

1140883548 ipratropium  
1141182628 tiotropium  
1140855320 isoetharine hydrochloride\*  
1140855322 numotac 10mg m/r tablet  
1140855328 aleudrin 20mg tablet\*\*  
1140855330 aleudrin 1% spray for nebuliser\*\*  
1140855332 iso-autohaler 80micrograms inhaler\*\*  
1140855358 theodrox tablet  
1140855360 sabidal sr-270 424mg m/r tablet  
1140855366 pro-vent 300mg m/r capsule  
1140855400 bronchodil 20mg tablet  
1140855424 theograd 350mg m/r tablet  
1140855426 biophylline 350mg m/r tablet  
1140855442 adrenaline+atropine compound spray  
1140855496 alupent expectorant 20mg tablet\*  
1140855504 bricanyl compound tablet  
1140855506 bricanyl expectorant elixir  
1140855530 nethaprin dospan m/r tablet  
1140855540 tedral tablet  
1140855542 tedral elixir  
1140855540 tedral tablet  
1140855542 tedral elixir  
1140862092 maxivent 100micrograms inhaler  
1140862144 salmeterol  
1140862148 serevent 25mcg inhaler  
1140862162 bricanyl 5mg tablet  
1140862168 bricanyl 250mcg inhaler  
1140862222 brelomax 2mg tablet  
1140862224 respacal 2mg tablet  
1140862236 atrovent 20micrograms inhaler  
1140862260 aminophylline  
1140862266 phyllocontin continus 225mg m/r tablet  
1140862274 pecram 225mg m/r tablet  
1140862280 bambec 10mg tablet  
1140862290 adrenaline product  
1140862292 medihaler-epi 280micrograms inhaler  
1140862294 adrenaline acid tartrate 280micrograms inhaler  
1140862306 cam 4mg/5ml s/f mixture  
1140862310 medihaler-iso 80micrograms inhaler  
1140862320 alupent 20mg tablet\*  
1140862336 amnivent 225 sr m/r tablet  
1140862346 choline theophyllinate  
1140862348 choledyl 100mg tablet  
1140862362 duovent inhaler  
1140862364 franol tablet  
1140862374 ephedrine hydrochloride+theophylline 11mg/120mg tablet  
1140862412 theophylline product  
1140862414 nuelin 125mg tablet  
1140862418 lasma 300mg m/r tablet  
1140862424 slo-phyllin 60mg m/r capsule  
1140862432 theo-dur 200mg m/r tablet  
1140862438 uniphyllin continus 200mg m/r tablet  
1140862474 aerobec 50mcg autohaler  
1140868364 prednisone  
1140868370 decortisyl 5mg tablet

|            |                                         |
|------------|-----------------------------------------|
| 1140881862 | oxivent 100mcg inhaler                  |
| 1141157264 | salmeterol product                      |
| 1141157402 | prednisolone product                    |
| 1141173346 | cortisone                               |
| 1141176832 | seretide 50 evohaler                    |
| 1141182632 | spiriva 18micrograms inhalation capsule |
| 1141195224 | formoterol                              |
| 1141195232 | budesonide+formoterol                   |
| 1141157126 | montelukast product                     |
| 1141157132 | singulair 10mg tablet                   |
| 1141168340 | zafirlukast                             |
| 1141168344 | accolate 20mg tablet                    |

\* Historic first-line bronchodilator. Now only used in severe asthma for when the patient is on standard therapy \*\* Historic bronchodilator

### ***Selection of UK Biobank controls for stage 1***

Controls were selected from UK Biobank under the following criteria; disease exclusion 1 (doctor diagnosed asthma, rhinitis, eczema, allergy, Emphysema/chronic bronchitis) (data field 6152), disease exclusion 2: individuals taking medicine for lung related conditions (data field 20003), exclude if one or more admission for asthma (ICD10 codes J45-J46) or COPD & bronchiectasis (ICD10 codes J40-J44, J47). From 146,073 European ancestry individuals available in the first release of UK Biobank genetic data, this selection gave 97,267 individuals available prior to age and sex matching to cases. 80,629 selected controls passed genotyping quality control and from these we selected 25,600 samples to give a 1:5 case-control ratio to balance statistical power and computational time.

### **Stage 2 case and control selection**

#### ***Selection of moderate-severe asthma patients from UK Biobank for stage 2 and 2a***

The second release of UK Biobank included 488,377 individuals of which 460,223 were of self-reported white ethnicity (data field 21000 - codes 1, 1001, 1002, 1003). From those not already included in stage 1, we identified 5,756 potential cases using the same criteria as stage 1 of which 5,499 passed genotyping quality control. 85 related individuals (2<sup>nd</sup> degree or closer) were excluded (68 related to stage 1 samples; 17 related to other stage 2 samples) leaving 5,414 severe asthma cases for replication.

#### ***Selection of UK Biobank controls for stage 2 and 2a***

In the full release of UK Biobank genotype data 314,431 individuals of self-reported white ethnicity who were not genotyped in the interim release from which stage 1 sample were selected. From these we identified 275,820 eligible controls by excluding individuals with self-reported doctor-diagnosed asthma or emphysema/chronic bronchitis (data field 6152). 275,144 samples passed genotyping quality control from which we excluded 28,504 samples that were 2<sup>nd</sup> degree or closer related to stage 1 or stage 2. From the remaining 246,640 we selected 27,082 age and gender matched controls to give a 1:5 case-control ratio, and from these we additionally excluded 5,611 individuals with self-reported rhinitis, eczema and allergy in data field 6152 leaving 21,471 controls in the stage 2 analysis. For stage 2a (sensitivity analyses) we used all 27,082 age and gender matched controls prior to exclusion of self-reported rhinitis, eczema and allergy in data field 6152.

### **Phasing and imputation**

To improve accuracy, phasing and imputation was done across all samples in the Stage 1 genotyping batches which included the case and control samples for this study. Accordingly, after quality control there were 102,247 samples included in the phasing and imputation. Variants with minor allele frequency <1%, Hardy-Weinberg  $P < 10^{-6}$  and call rate <95% were excluded leaving 589,812 quality controlled variants to be phased and used as the imputation input.

Phasing was performed using SHAPEIT v3<sup>3</sup> and imputation was performed using IMPUTE v2.3.2<sup>4</sup> using combined 1000 genomes phase 3 and UK10K<sup>5</sup> reference panels (merged with IMPUTE v2.3.2) comprising 81.6 million variants. After imputation we retained 33.6 million well-imputed variants (imputation INFO score > 0.5 and minor allele count  $\geq 3$ ) for association testing.

In stage 2 we used the genotypes provided with the UK Biobank final release comprising 39 million variants imputed to the Haplotype Reference Consortium (HRC) [Bycroft 2017 <https://doi.org/10.1101/166298>].

### Stage 1 genome-wide analyses

Genome-wide association testing was run with SNPTEST v2.5<sup>6</sup> using a logistic model to associate moderate-severe asthma risk with imputed genotype dose (continuous from 0-2 reflecting imputation uncertainty), including the first 10 ancestry principal components as the only covariates (samples were matched in age-sex strata during selection) and using the fast score test option for computational speed.

We applied genomic control using the LD score regression intercept (LDSC software)<sup>7</sup> as the inflation factor  $\lambda$  to appropriately correct test statistics for inflation due to confounding (Supplementary Figure 1).

### Selection of signals for stage 2

We used a threshold of  $P < 10^{-6}$  to select signals for follow up in stage 2. In order to define our initial set of associated loci, we selected the most significant variant as the sentinel variant and all variants within  $\pm 500$ kb as belonging to the locus represented by this sentinel. We then select the next most significant variant outside the newly defined locus as the next sentinel and so on until there are no more variants with  $P < 10^{-6}$  not already attributed to a locus. We then performed stepwise conditional analysis on the variants within each locus, conditioning on the sentinel variant initially, to identify independent signals within each 1 Mb locus, thereby obtaining a set of independently associated signals for follow up in stage 2.

### Checking for array effects in stage 1

In stage 1 1707 cases and 8329 controls (1:4.88 case-control ratio) were genotyped on the Affymetrix Axiom® UK BiLEVE array<sup>8</sup> and 3428 cases and 17346 controls on the Affymetrix Axiom® UK Biobank array (1:5.06 case-control ratio) with moderate-severe asthma case status independent of array (Fisher exact test  $P=0.27$ ). We performed a sensitivity analysis of the stage 1 association testing to any array effects by repeating the association test with array as a covariate for our 32 signals followed up in stage 1. There was no significant change in effect size (Supplementary Figure 2) or association  $P$  value between adjusted and unadjusted results.

### Stage 2 case-control analyses and meta-analyses

The stage 2 and 2a (sensitivity) replication association testing was performed in an identical manner to stage 1. Stage 1 and stage 2 were meta-analysed using inverse-variance weighted meta-analysis. In cases where a variant was not available or poorly imputed in stage 2, a proxy was chosen (rsid.ukb in Supplementary Table 2) and used in the meta-analysis of stage 1 and stage 2.

### Expression quantitative trait loci (eQTL)

The variants identified as associated with susceptibility to moderate-severe asthma as well as variants in LD ( $r^2 > 0.4$ ) were investigated in two eQTL datasets; a blood eQTL database<sup>9</sup> and a lung eQTL database<sup>10,11</sup>. The blood cell resource contained eQTL data for variants showing any association with peripheral blood samples from 5,311 individuals. Subjects were genotyped on various platforms and imputed using HapMap. The lung eQTL database consisted of non-tumour lung tissue from 1,110 individuals who had undergone lung resection and genotyped on the Illumina Human1M-Duo BeadChip array. A FDR threshold of 10% was used for eQTLs in these two databases.

To complement these eQTL resources we also had access to an additional five eQTL datasets generated as part of the U-BIOPRED initiative including; blood  $n=345$ , sputum  $n=91$ , biopsy  $n=84$ , bronchial brushing  $n=117$  and nasal brushing  $n=75$ . To maximise power we included all subjects from U-BIOPRED in the eQTL analyses, i.e. a: severe non-smoking asthma, b: severe smoking asthma, c: mild-moderate asthma and d: healthy controls.

| Traits          | Blood (n)    | Sputum (n)  | Biopsy (n)  | Bronchial brushing (n) | Nasal brushing (n) |
|-----------------|--------------|-------------|-------------|------------------------|--------------------|
| Cohort(a/b/c/d) | 161/65/59/60 | 44/19/16/12 | 36/10/22/16 | 41/14/29/33            | 26/9/19/21         |

The U-BIOPRED cohort was genotyped using the Affymetrix Axiom® UK Biobank array and after imputation (SHAPEIT2 for pre-phasing) and IMPUTE 2, using 1000 Genome-phase3 as reference panel) and quality control, there were 2,536,796 SNPs for association testing. Transcriptomic analysis was performed with the Affymetrix HT HG-U133 1 PM GeneChip (Affymetrix, Santa Clara, Calif) on extracted RNA. Technical and biological quality checks were performed according to Affymetrix recommendations with only RNA samples of high purity (RNA integrity number  $> 6.5$ ) used for amplification<sup>12,13</sup>. A FDR threshold of 5% was used for

the smaller U-BIOPRED eQTL resources. For the MUC5AC rs11603634 eQTL (via proxy rs11602802) identified in bronchial brushings we also repeated analyses in asthma subjects alone with similar findings.

#### **mRNA analyses in control and asthma subject biological samples**

To determine the relative expression of *MUC5AC* and *KIAA1109* in bronchial epithelial cell brush samples from asthma and control subjects we used two freely available gene expression datasets from the Gene Expression Omnibus (GEO) resource (<https://www.ncbi.nlm.nih.gov/geo/>). The datasets included; GSE43696 which includes Agilent Human GE 4×44K V2 Gene Expression data for 20 control, 50 mild and 38 severe asthma subjects<sup>14</sup>. Asthma severity was defined based on; mild/moderate-severe asthma had an FEV<sub>1</sub> of >60%predicted, with/without low–moderate dose inhaled CS and severe asthma subjects had continuous use of high-dose inhaled CS and/or frequent use of oral CS with continuing symptoms and/or chronic airflow limitation. We also used, GSE89809 which includes Affymetrix HT HG-U133+ PM GeneChip data for 18 control, 14 mild, 13 moderate and 11 severe asthma subjects<sup>15</sup>. Asthma severity was defined based on; mild patients with asthma on  $\beta_2$ -agonists alone, 17 subjects with moderate asthma on ICS and 14 subjects with severe asthma with persistent symptoms despite high-dose ICS (n =14) and oral corticosteroids (n = 4).

## References

1. Wan YI, Shrine NR, Soler Artigas M, et al. Genome-wide association study to identify genetic determinants of severe asthma. *Thorax* 2012; **67**(9): 762-8.
2. Shaw DE, Sousa AR, Fowler SJ, et al. Clinical and inflammatory characteristics of the European U-BIOPRED adult severe asthma cohort. *Eur Respir J* 2015; **46**(5): 1308-21.
3. O'Connell J, Sharp K, Shrine N, et al. Haplotype estimation for biobank-scale data sets. *Nature Genetics* 2016; **48**: 817.
4. Howie BN, Donnelly P, Marchini J. A Flexible and Accurate Genotype Imputation Method for the Next Generation of Genome-Wide Association Studies. *PLOS Genetics* 2009; **5**(6): e1000529.
5. Huang J, Howie B, McCarthy S, et al. Improved imputation of low-frequency and rare variants using the UK10K haplotype reference panel. *Nature Communications* 2015; **6**: 8111.
6. Marchini J, Howie B, Myers S, McVean G, Donnelly P. A new multipoint method for genome-wide association studies by imputation of genotypes. *Nature Genetics* 2007; **39**: 906.
7. Bulik-Sullivan BK, Loh P-R, Finucane HK, et al. LD Score regression distinguishes confounding from polygenicity in genome-wide association studies. *Nature Genetics* 2015; **47**: 291.
8. Wain LV, Shrine N, Miller S, et al. Novel insights into the genetics of smoking behaviour, lung function, and chronic obstructive pulmonary disease (UK BiLEVE): a genetic association study in UK Biobank. *Lancet Respir Med* 2015; **3**(10): 769-81.
9. Westra HJ, Peters MJ, Esko T, et al. Systematic identification of trans eQTLs as putative drivers of known disease associations. *Nat Genet* 2013; **45**(10): 1238-43.
10. Hao K, Bosse Y, Nickle DC, et al. Lung eQTLs to help reveal the molecular underpinnings of asthma. *PLoS Genet* 2012; **8**(11): e1003029.
11. Lamontagne M, Couture C, Postma DS, et al. Refining susceptibility loci of chronic obstructive pulmonary disease with lung eqtls. *PLoS One* 2013; **8**(7): e70220.
12. Hekking PP, Loza MJ, Pavlidis S, et al. Pathway discovery using transcriptomic profiles in adult-onset severe asthma. *J Allergy Clin Immunol* 2017.
13. Lefaudeux D, De Meulder B, Loza MJ, et al. U-BIOPRED clinical adult asthma clusters linked to a subset of sputum omics. *J Allergy Clin Immunol* 2017; **139**(6): 1797-807.
14. Voraphani N, Gladwin MT, Contreras AU, et al. An airway epithelial iNOS-DUOX2-thyroid peroxidase metabolome drives Th1/Th2 nitrative stress in human severe asthma. *Mucosal Immunol* 2014; **7**(5): 1175-85.
15. Singhania A, Wallington JC, Smith CG, et al. Multi-tissue Transcriptomics Delineates the Diversity of Airway T Cell Functions in Asthma. *Am J Respir Cell Mol Biol* 2017.



## Supplementary Figures and Tables

Supplementary Figure 1: Quantile-quantile (QQ) plot for Stage 1: the unadjusted genomic inflation factor  $\lambda$  was 1.124. After correcting for polygenicity using LD score regression<sup>7</sup> the residual inflation factor used for genomic control was 1.029.

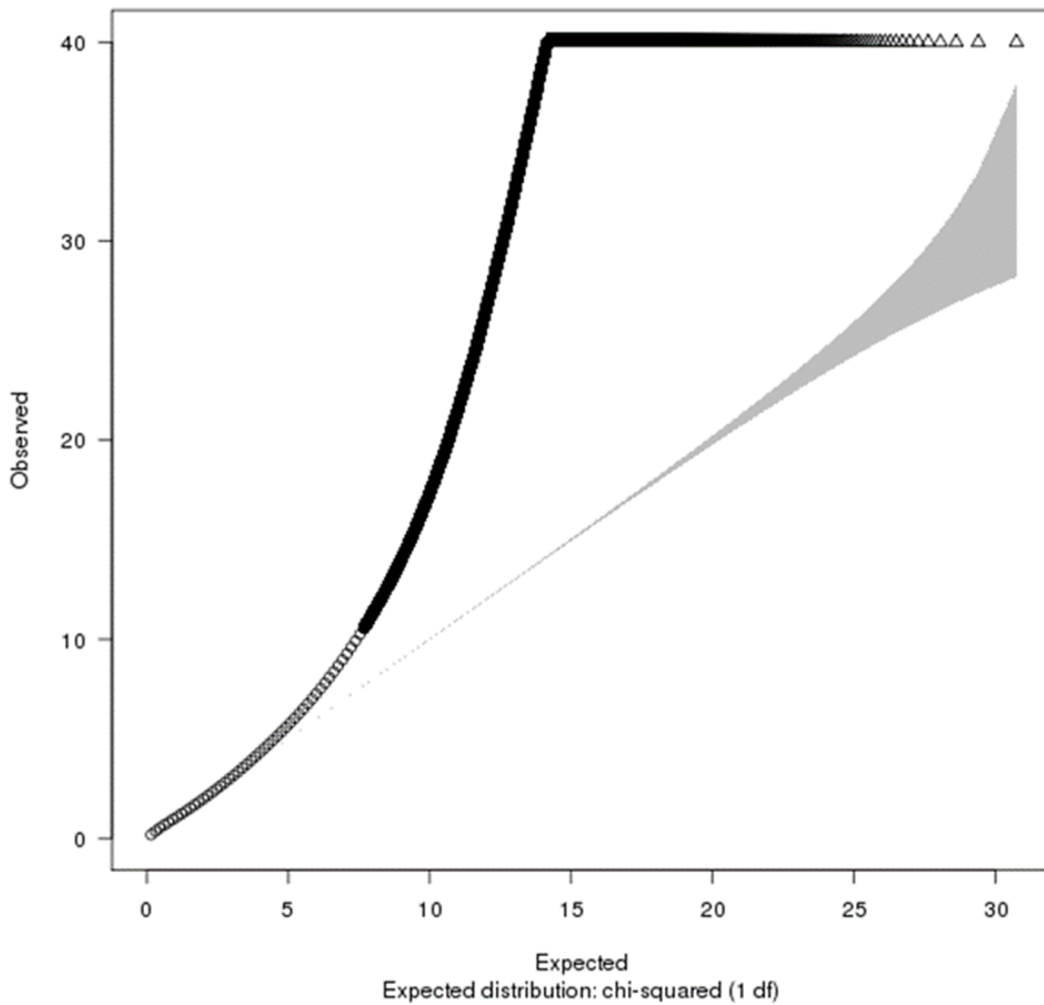

Supplementary Figure 2: Sensitivity of association testing to array effects. The effect sizes for the 32 signals followed up from stage 1 are plotted, betas (log odds ratios) adjusted for array effects vs. unadjusted betas. Error bars are the standard errors of the effect estimates.

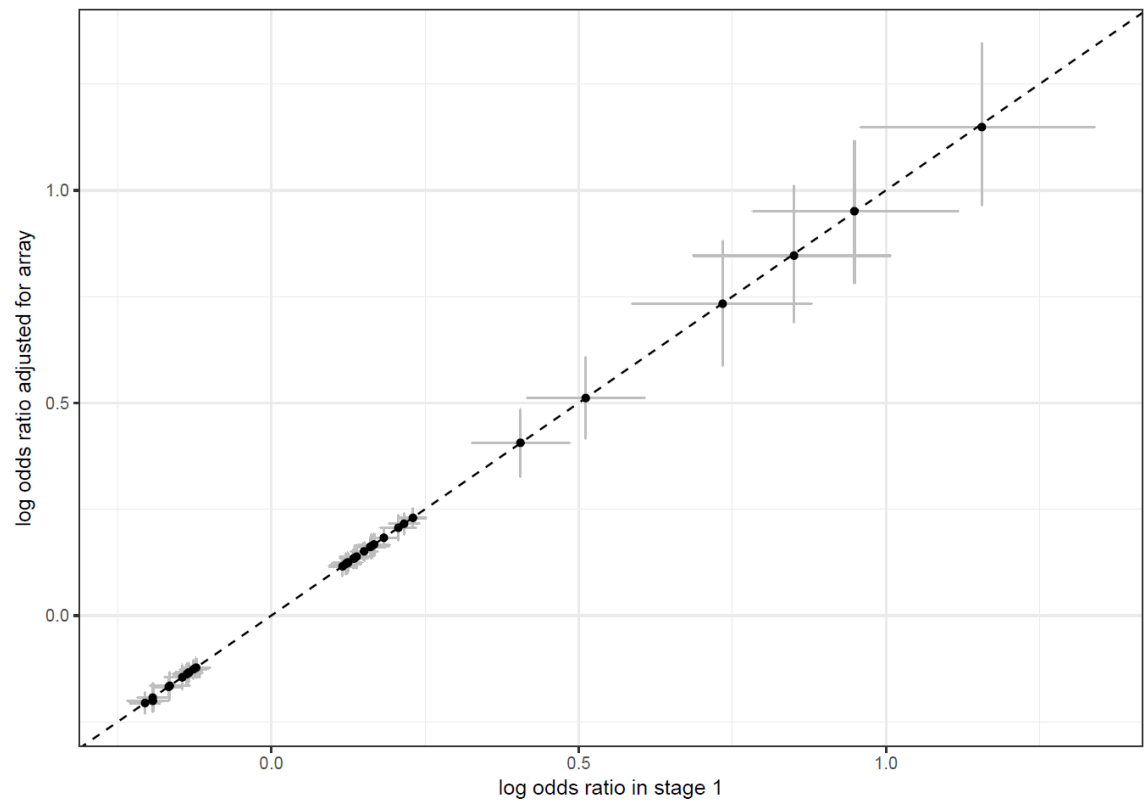

Supplementary Figure 3: Regional association plots for 32 signals taken forward in stage 1. Significance of each single nucleotide polymorphism (SNP) on the  $-\log_{10}$  scale as a function of chromosome position (NCBI build 37). The sentinel SNP at each locus is shown by the blue peak, and data points are colour coded to show the correlations ( $r^2$ ) of each of the surrounding SNPs to the sentinel SNP. The green line indicates criteria for inclusion in stage 2 ( $P < 1 \times 10^{-6}$ ) and the red line indicates genome-wide significance ( $P < 5 \times 10^{-8}$ ).

rs301819 *RERE*

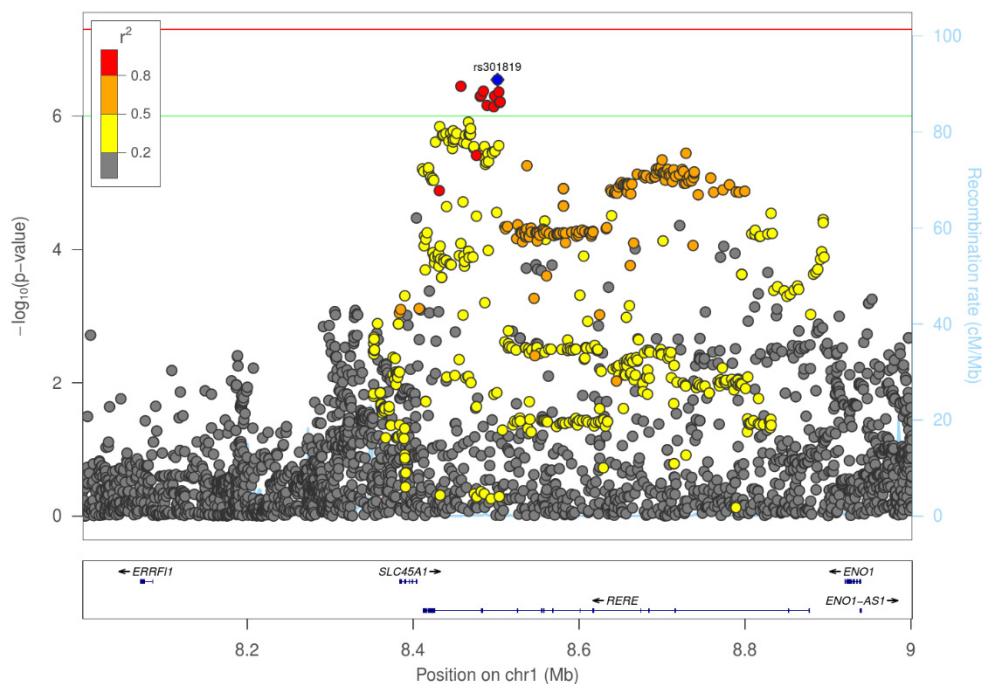

rs137907825 *TNFRSF8*

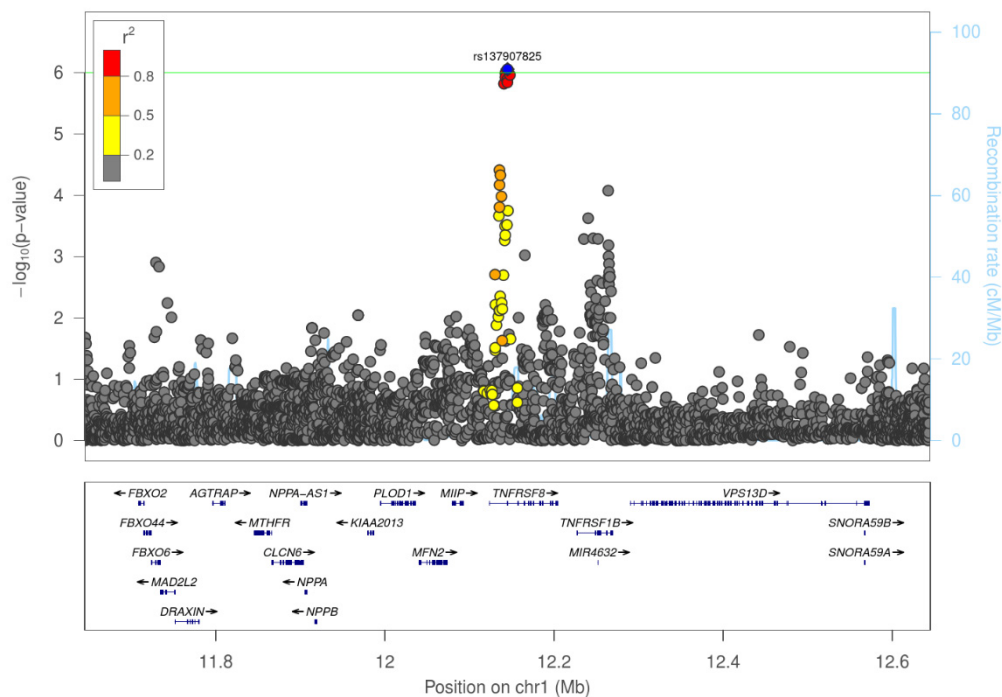

rs147639436 *PIFO*

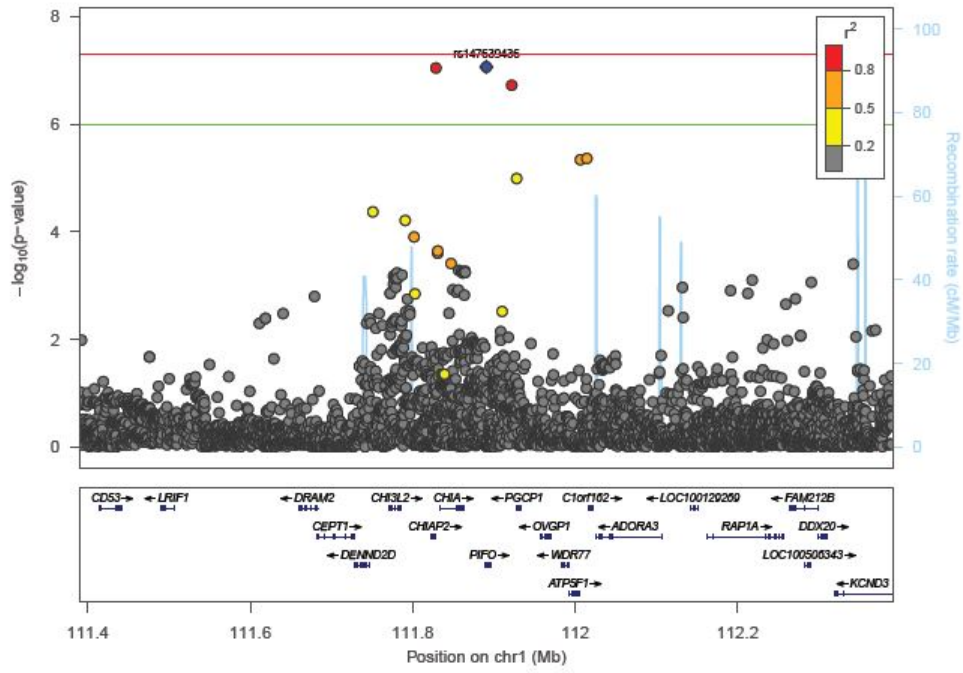

rs61816761 *FLG*

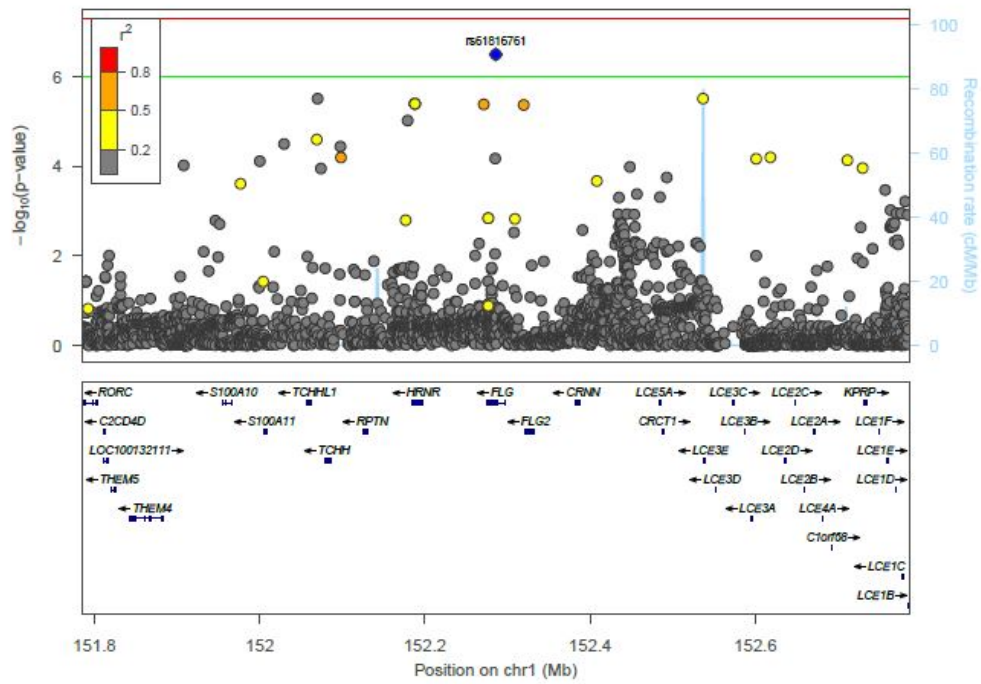

rs7523907 *CD247*

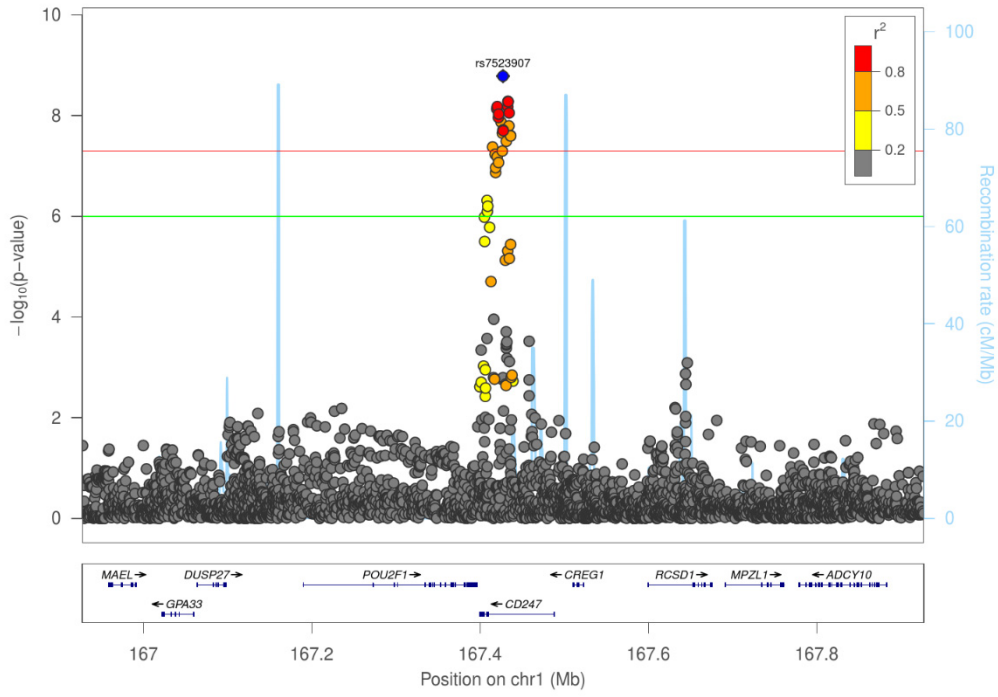

rs12479210 *IL1RL1*

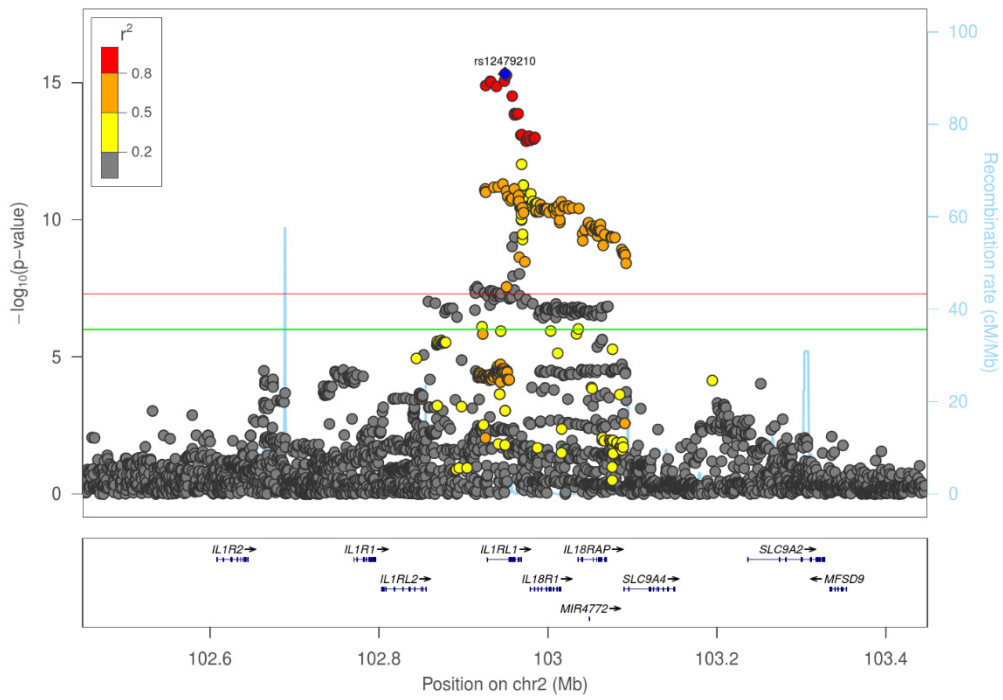

rs34290285 *D2HGDH*

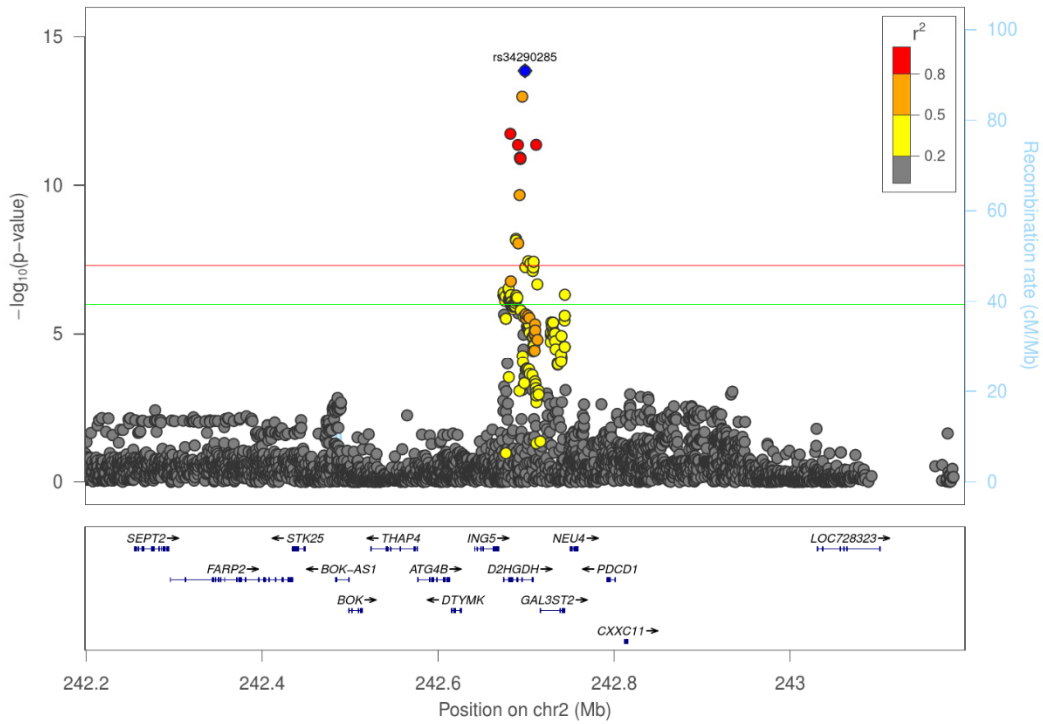

rs560026225 (4:123055701:G:GATT) *KIAA1109*

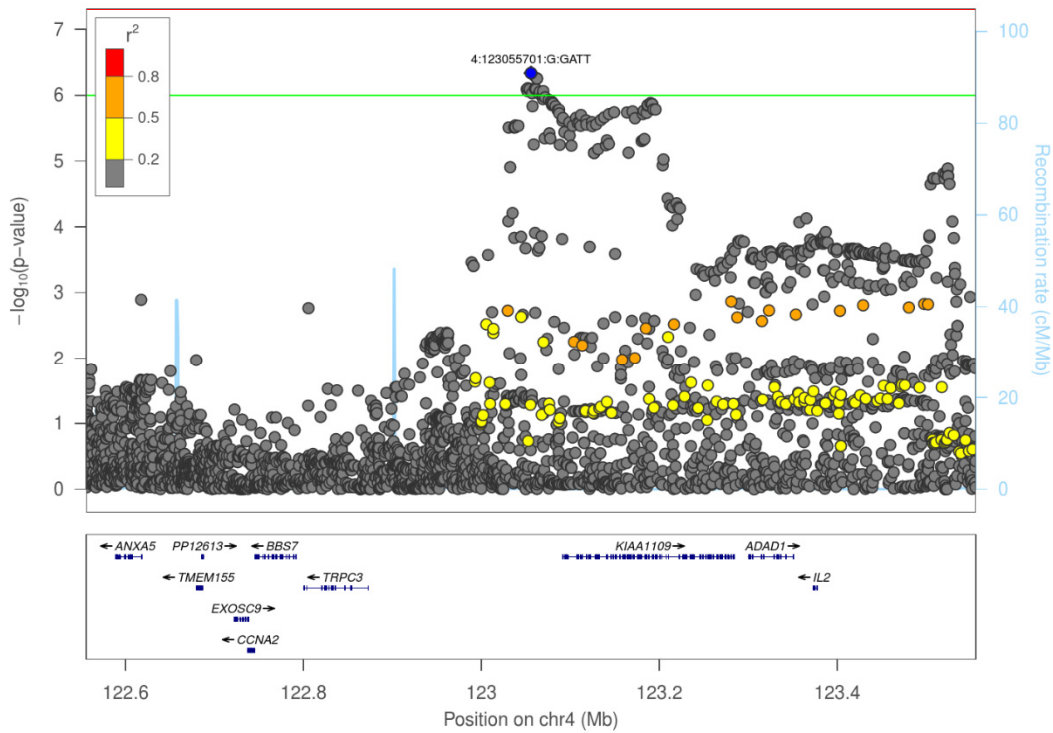

rs1837253 (*Affx-25366072*) *TSLP*

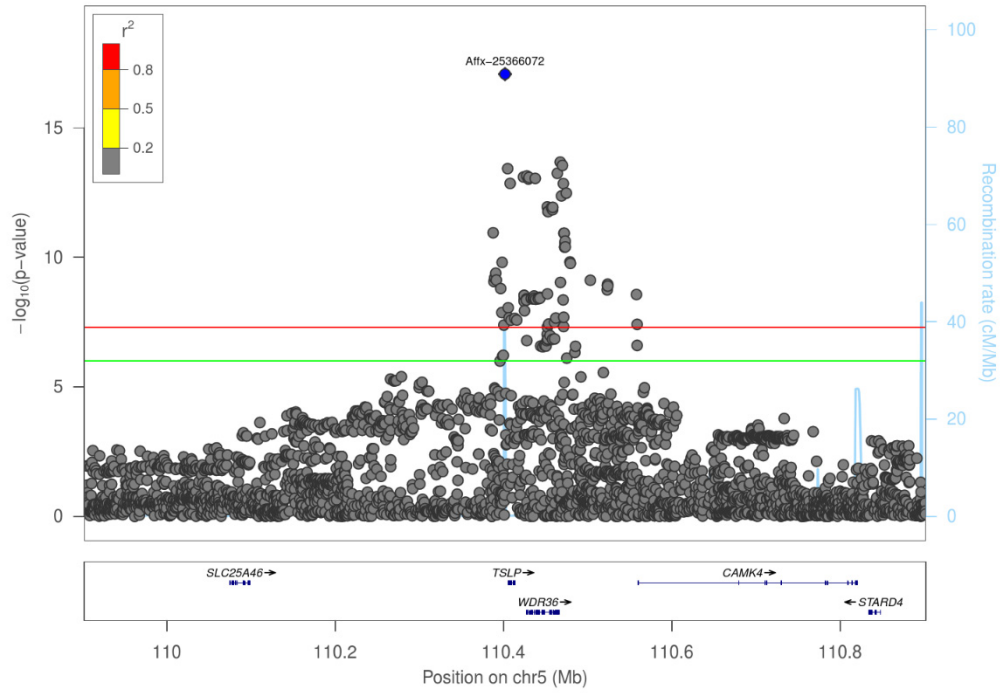

rs1438673 *WDR36* (conditioned on rs1837253)

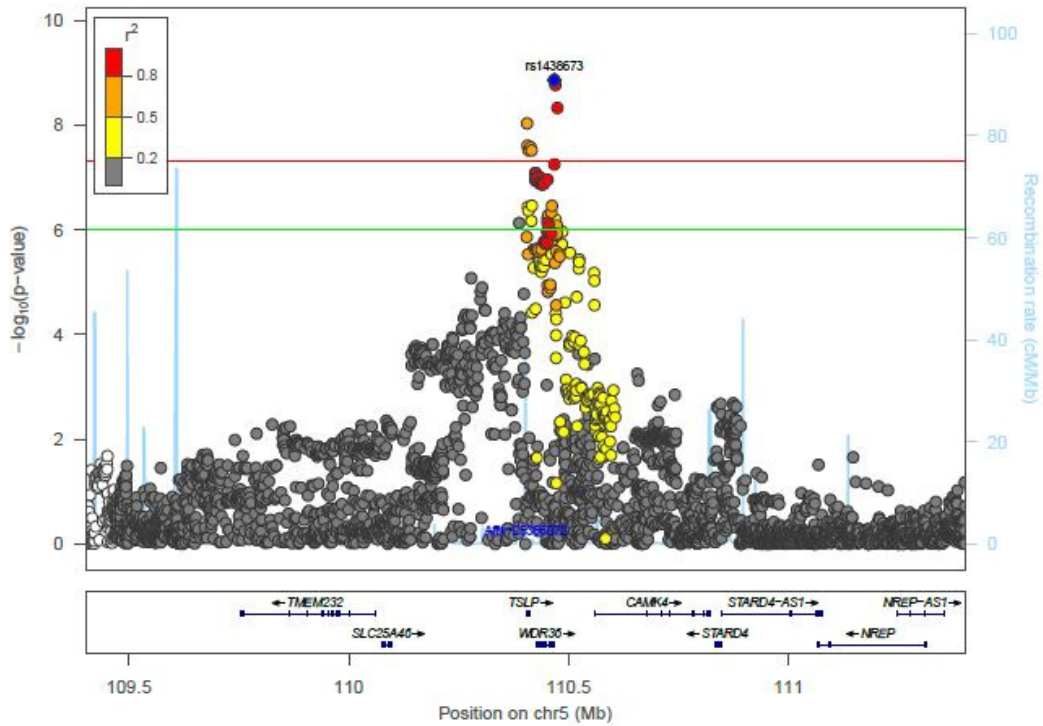

rs3749833 *C5orf56*

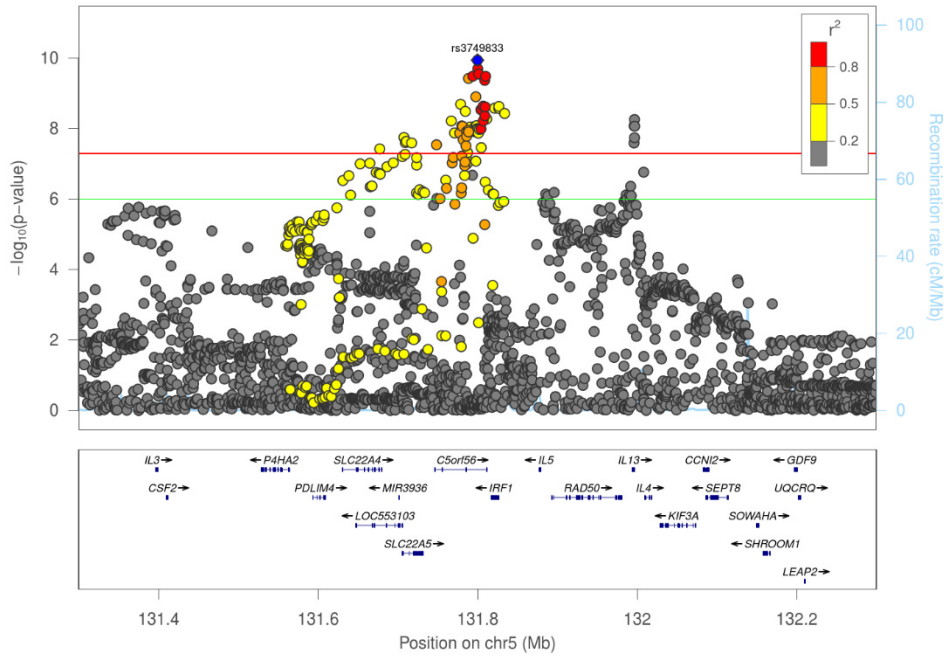

rs1986009 *RAD50* (conditioned on rs3749833)

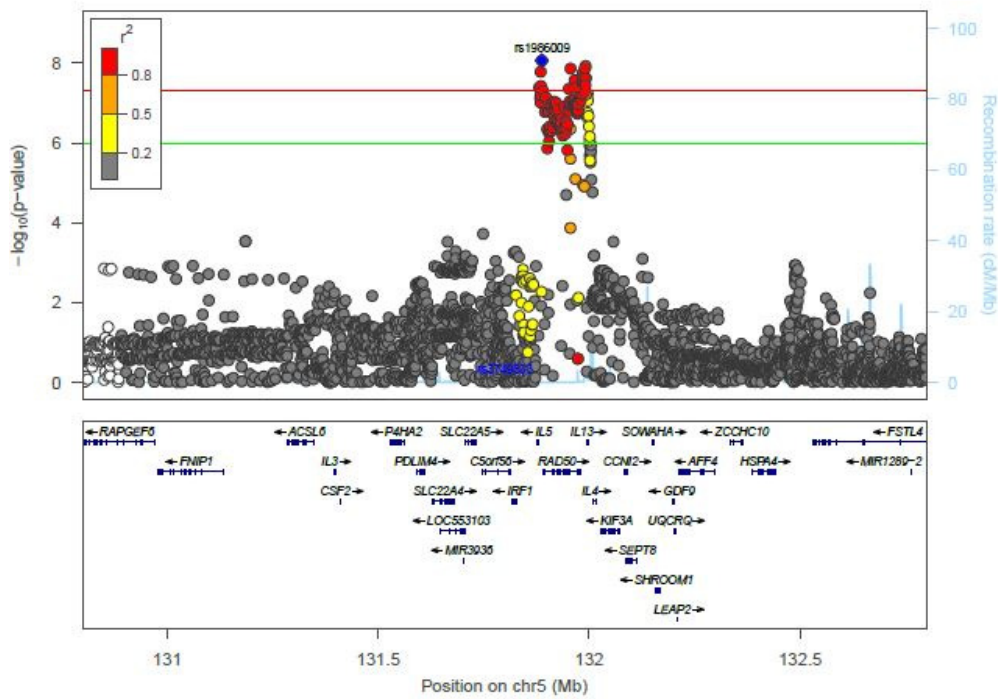



rs551660440 (5:180078030:G:A) *FLT4*

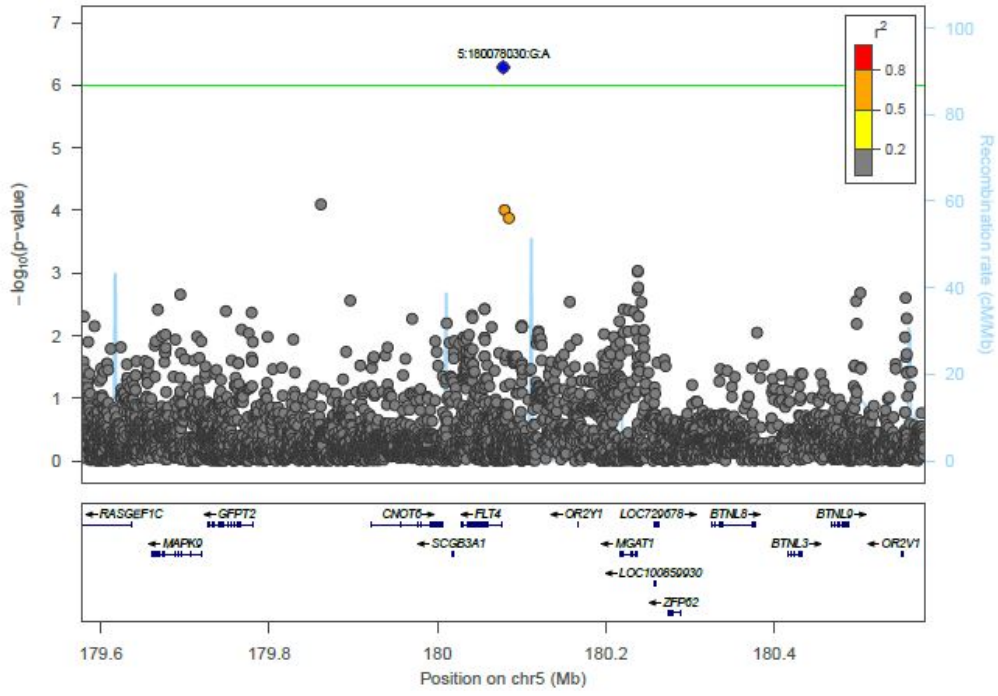

rs9273410 *HLA-DQB1*

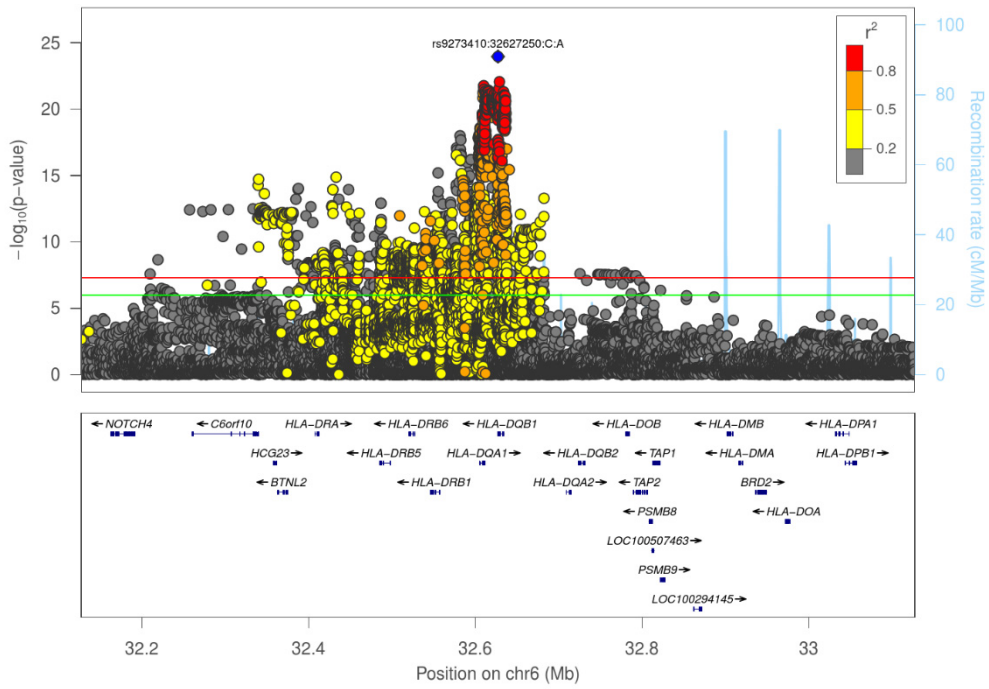

rs77611176 (chr6:32581739) *HLA-DQA1* (conditioned on rs9273410)

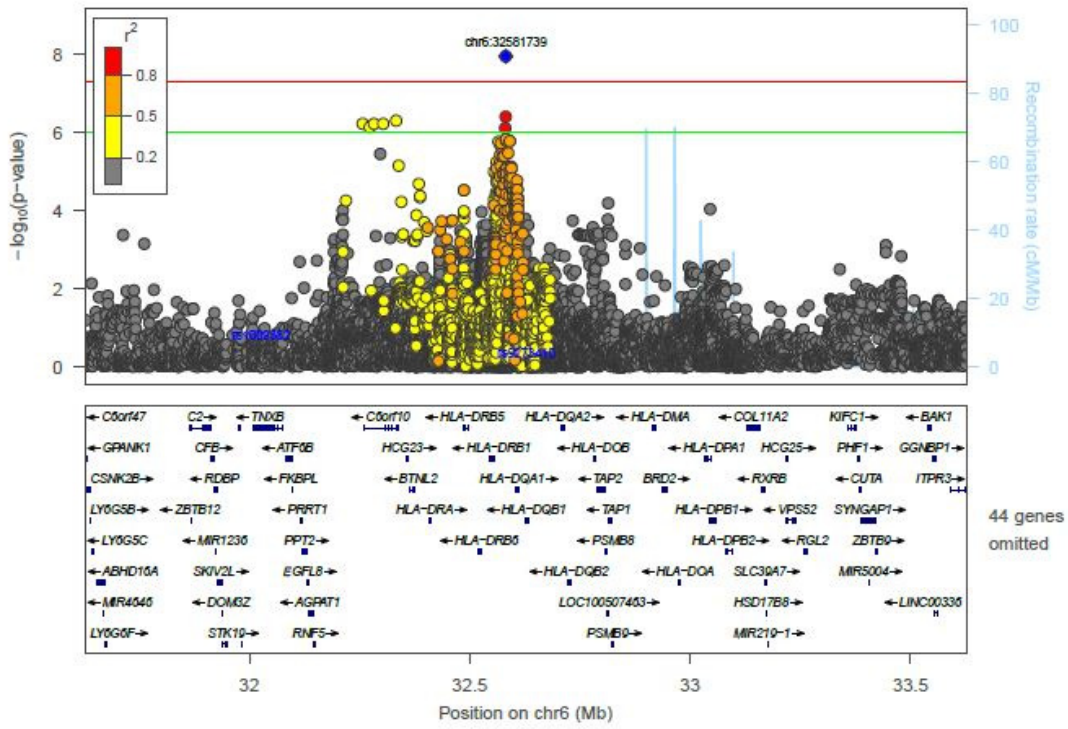

rs367983479 *BACH2*

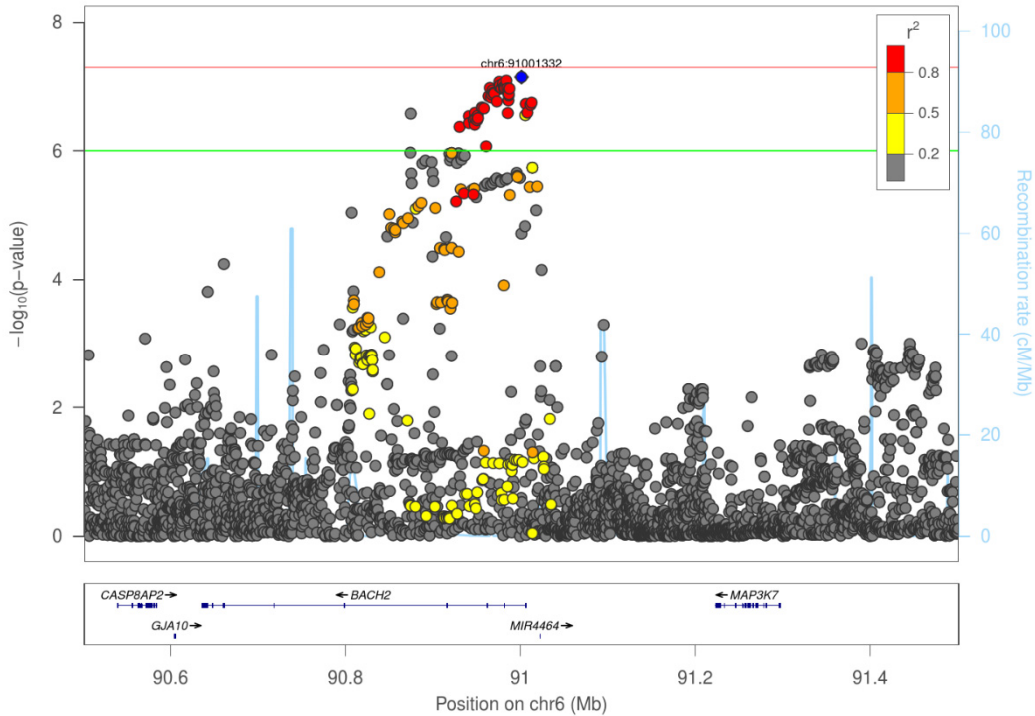

rs56192946 *TNS3*

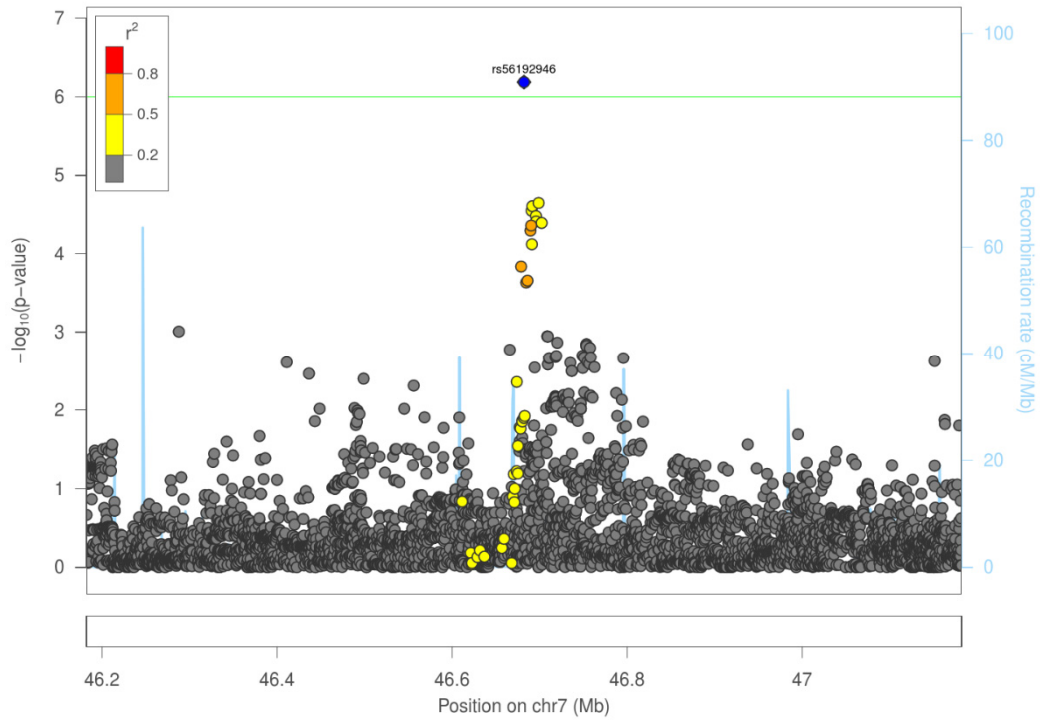

rs71266076 *MIR5708*

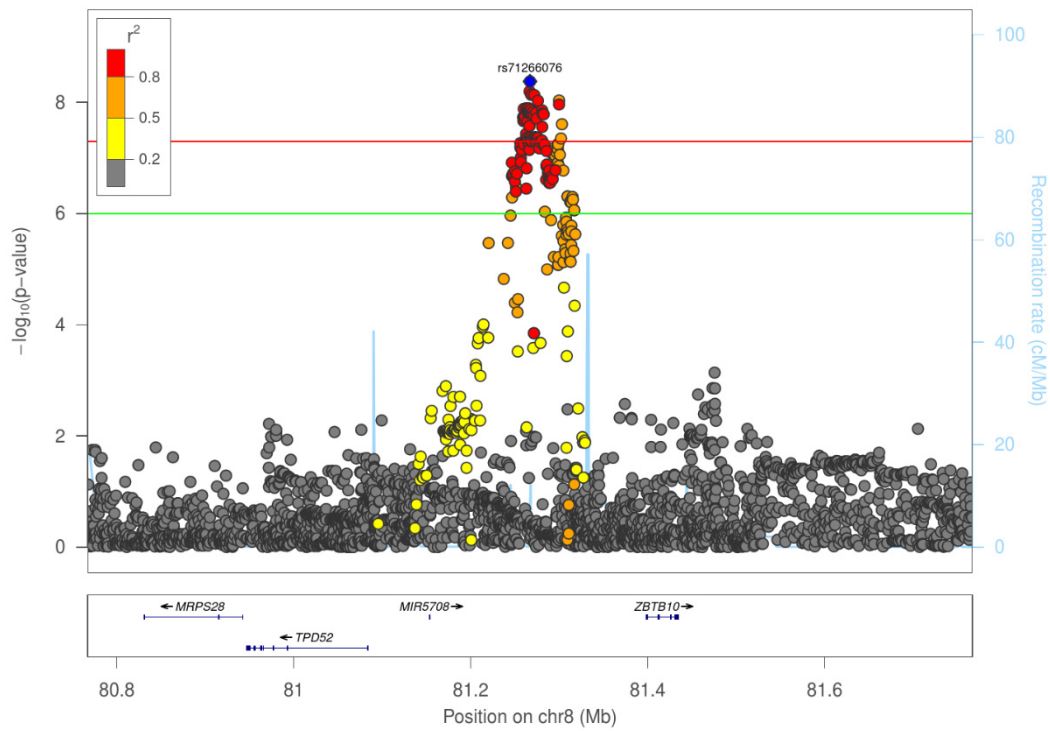

rs144829310 *IL33*

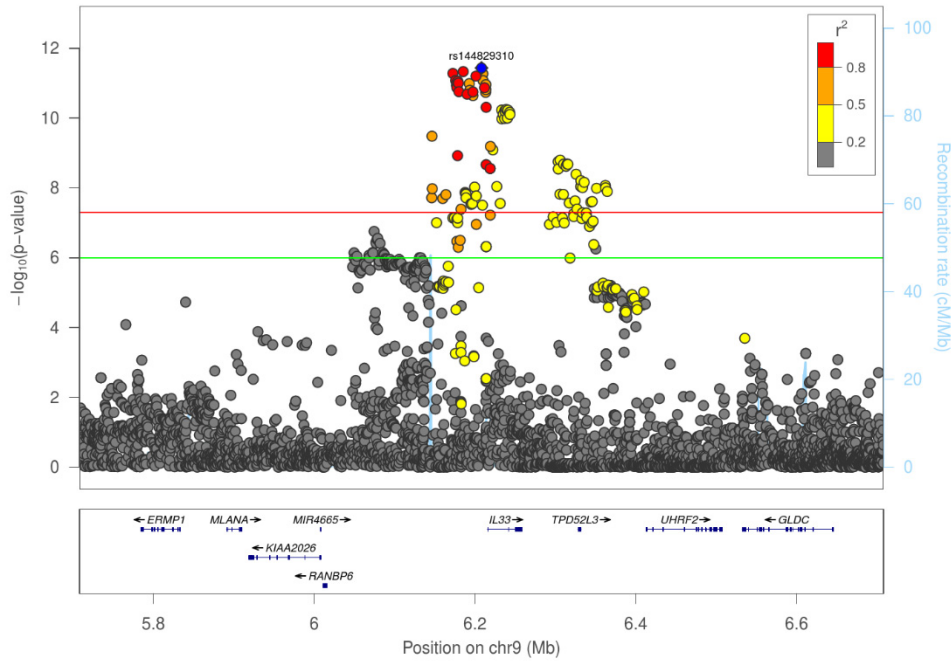

rs551372748 *CACNA1B*

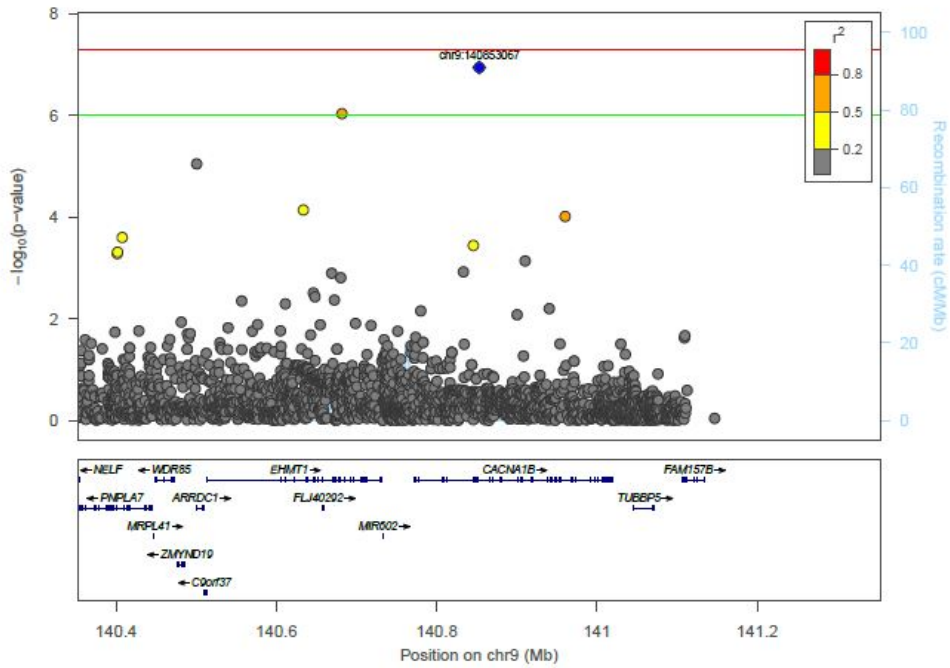

rs10905284 *GATA3*

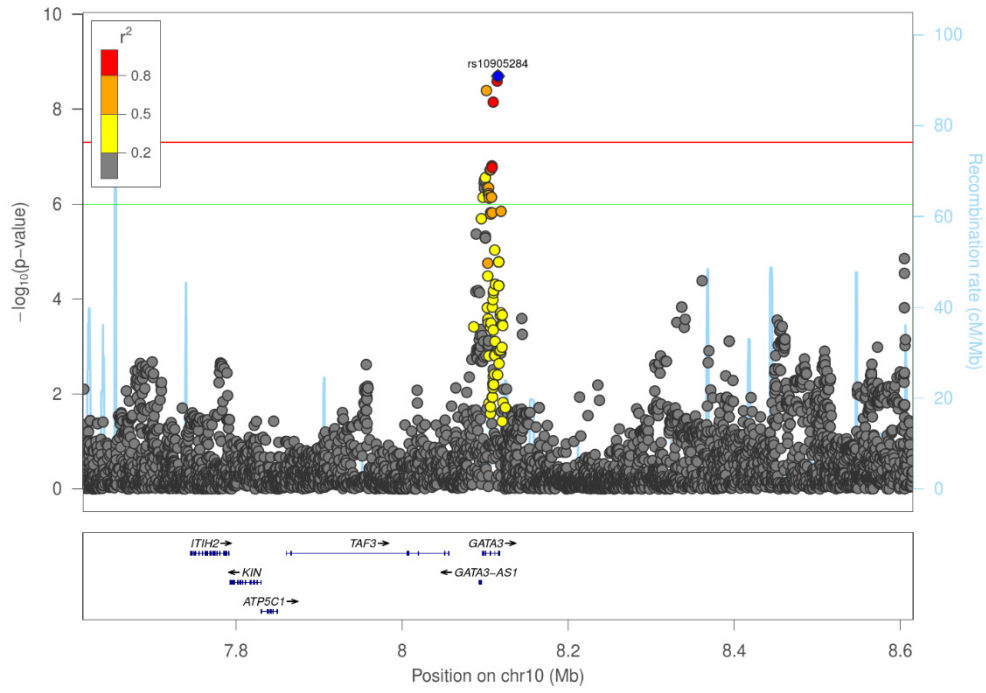

rs61840192 *LOC101928272*

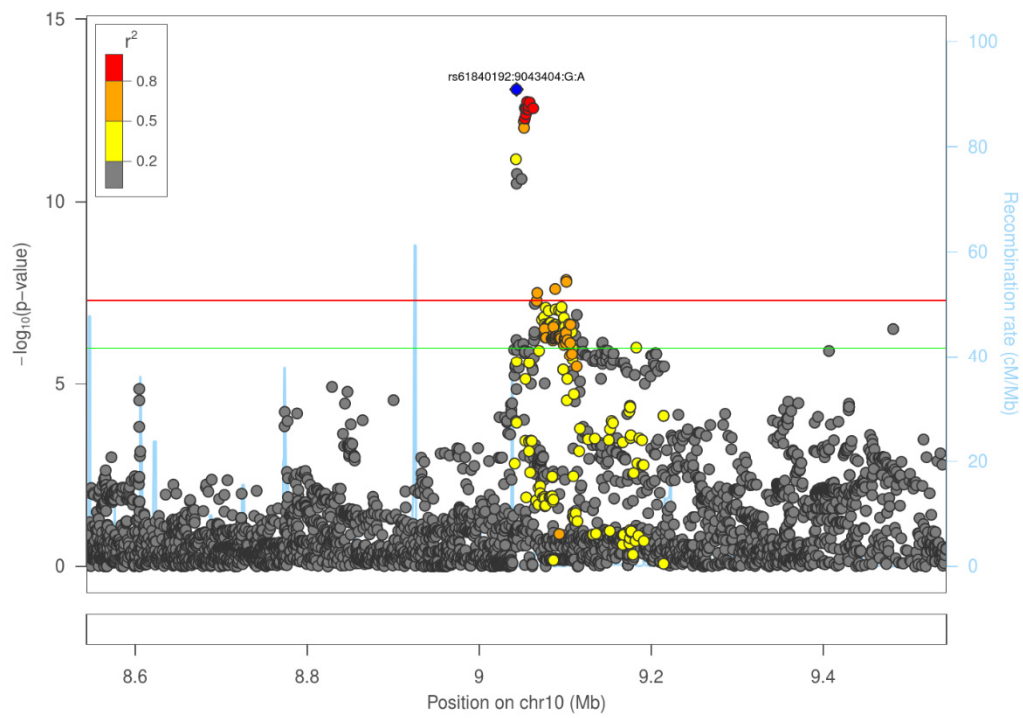

rs11603634 *MUC5AC*

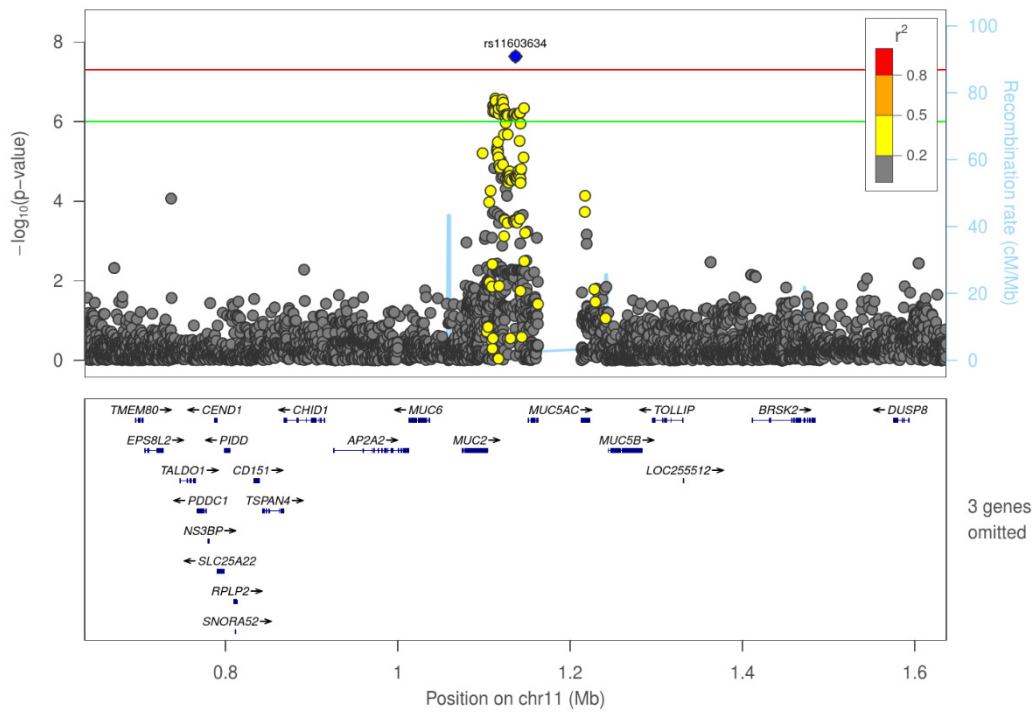

rs7936312 *C11orf30*

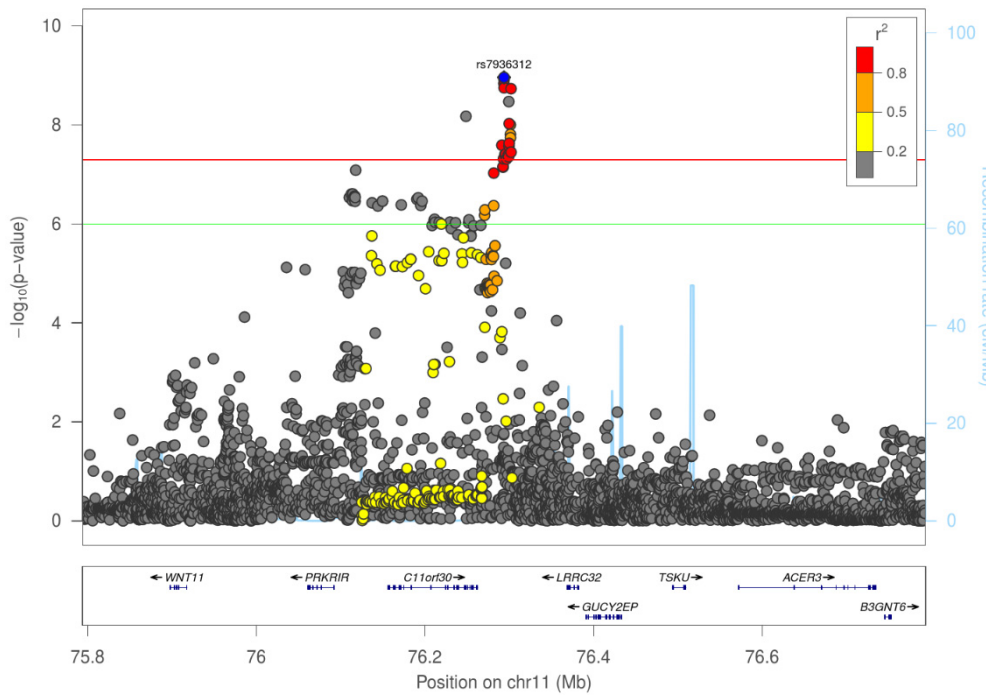

rs7305461 *RPS26*

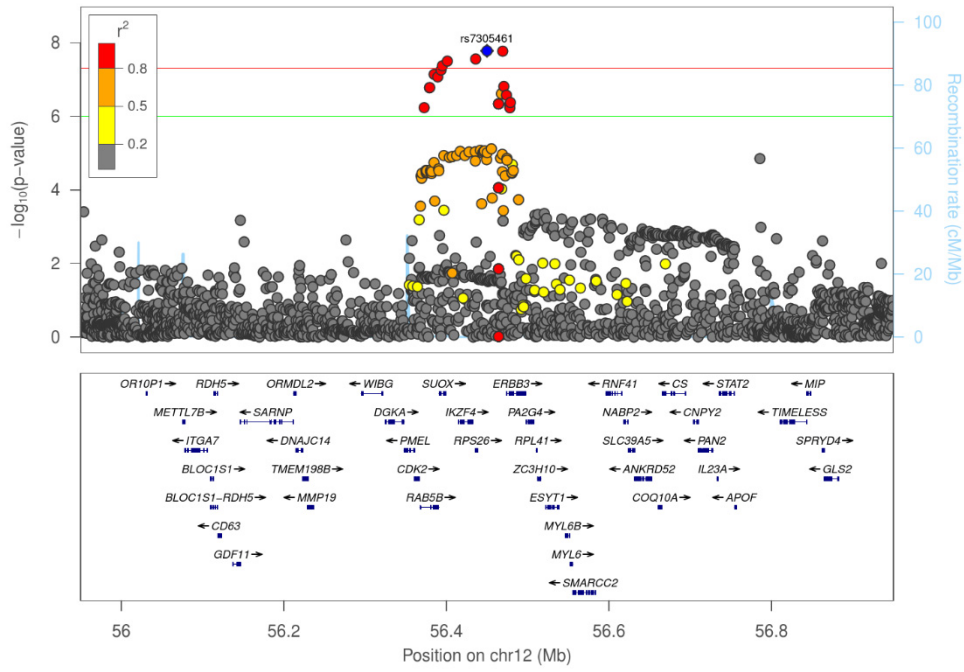

rs703816 *STAT6*

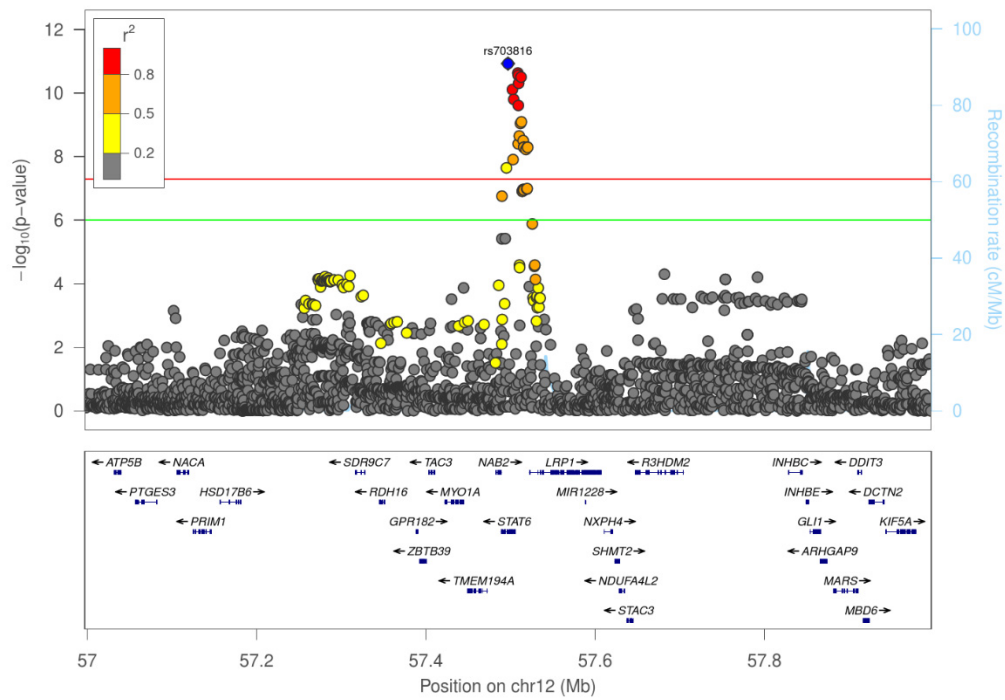

rs9517738 *LINC01232*

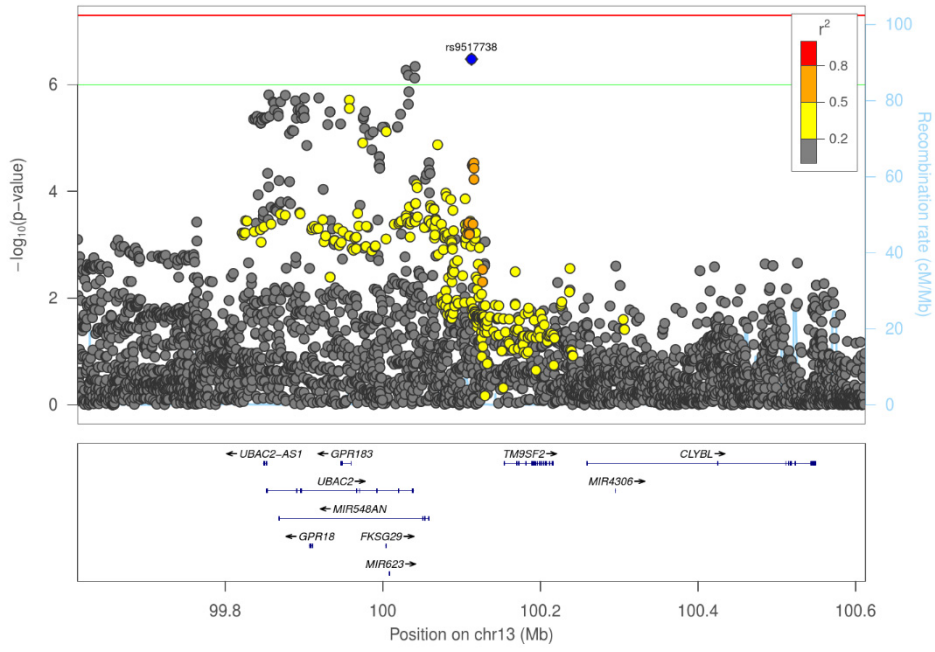

rs10519068 *RORA*

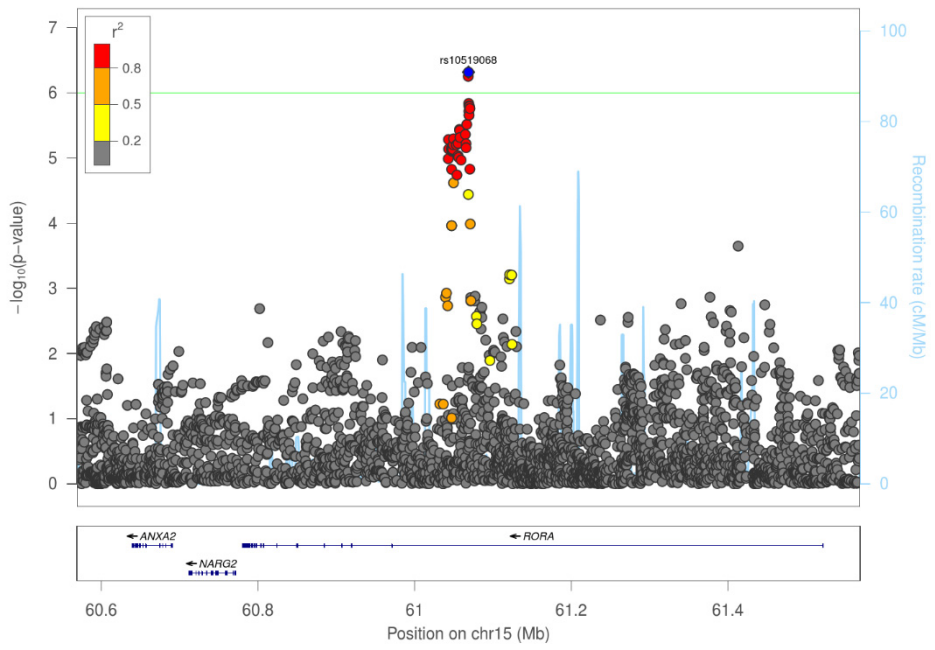



rs72743461 *SMAD3*

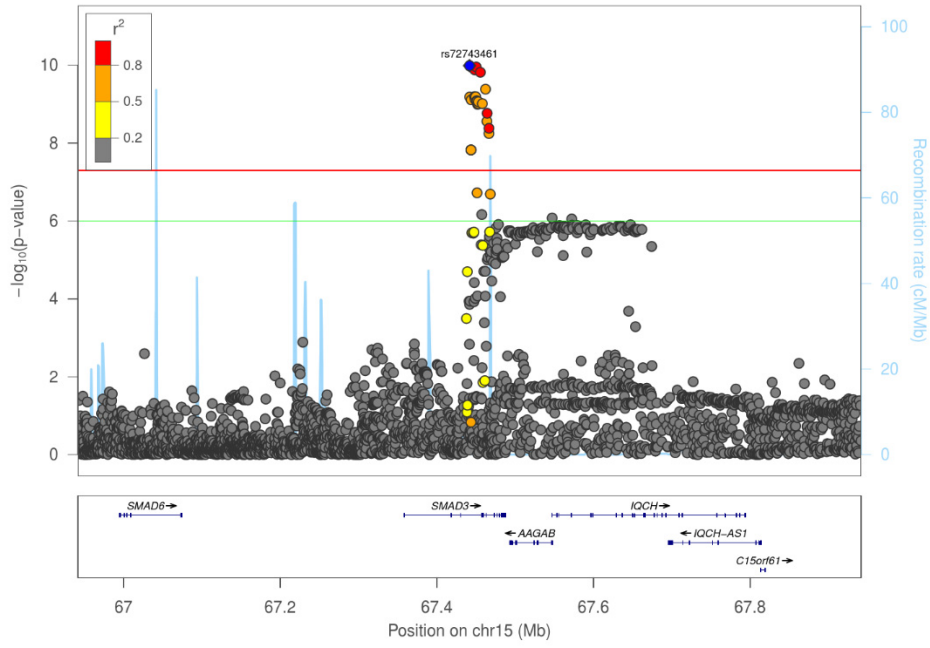

rs7203459 *CLEC16A*

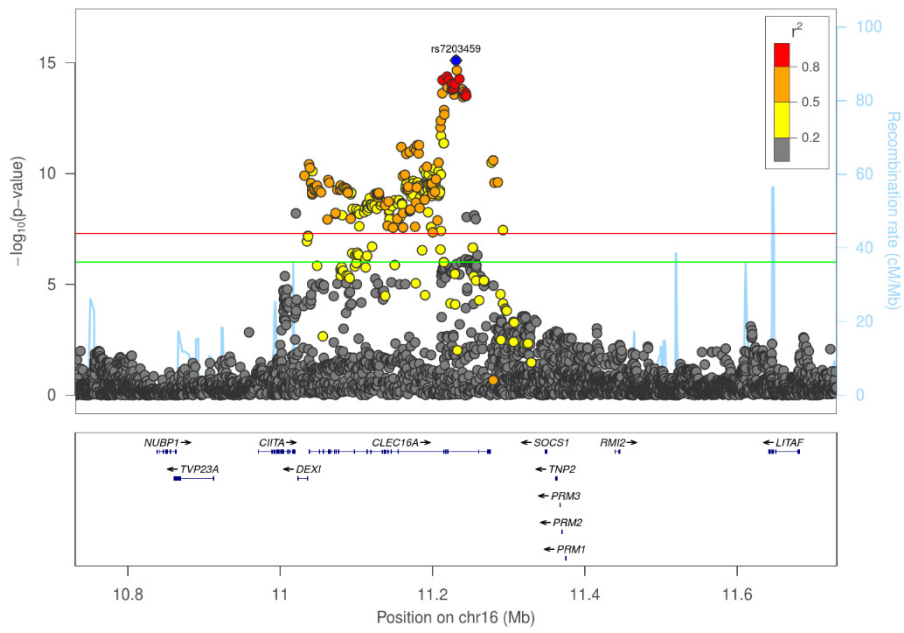

rs2941522 *IKZF3*

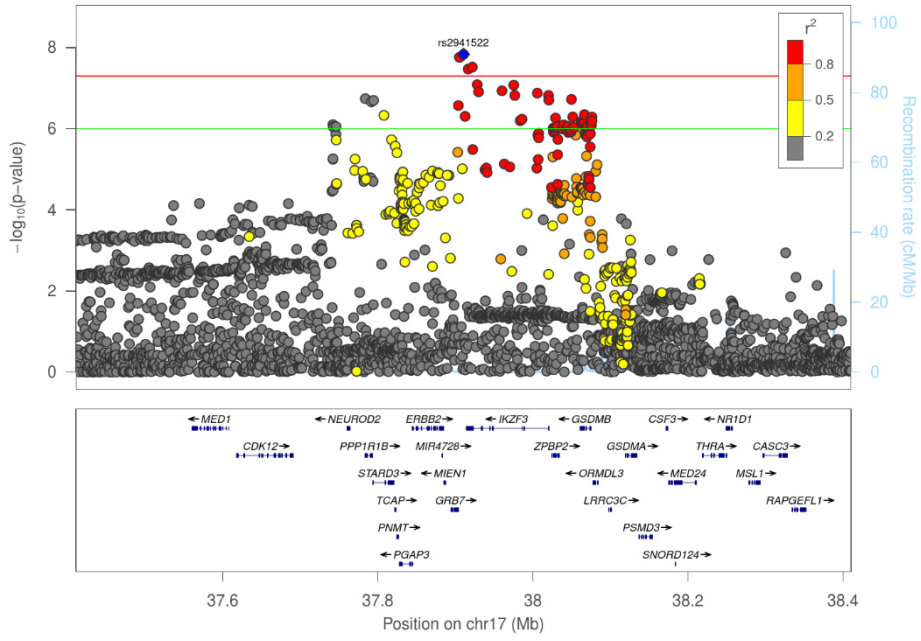

rs112502960 *ZNF652*

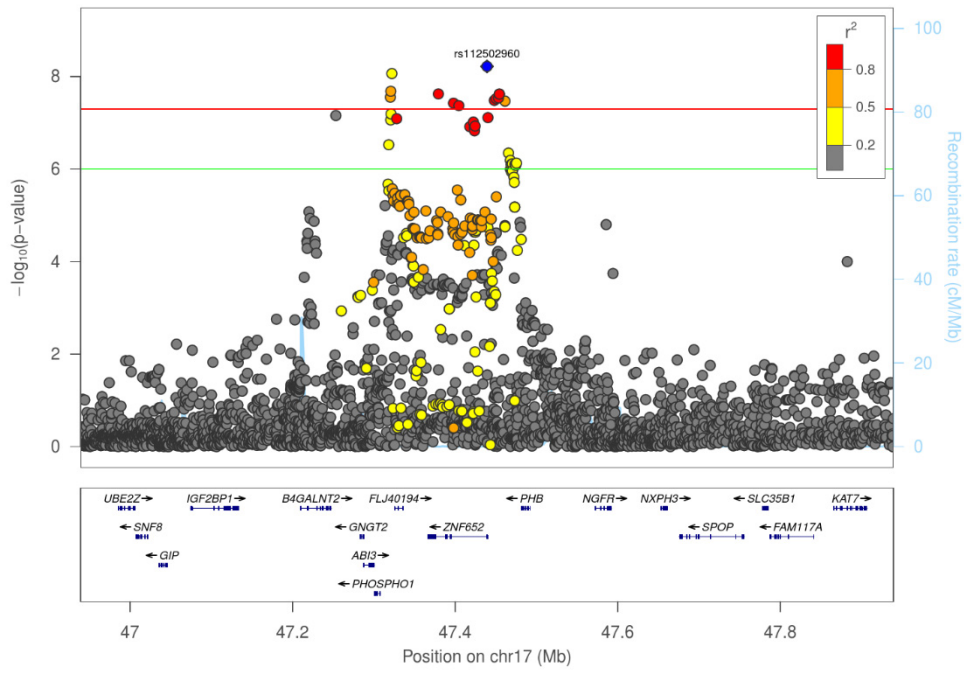

Supplementary Figure 4: rs11603634 shows a non-significant association with *MUC5B* mRNA expression in bronchial epithelial brush samples. Bronchial epithelial brush samples (n=117) were collected as part of the U-BIOPRED study, DNA was extracted and genotypes generated using the Affymetrix Axiom® UK Biobank array and imputation, RNA was extracted and transcriptomic analysis was performed using the Affymetrix HT HG-U133 1 PM GeneChip. rs11603634 was not directly genotyped, therefore proxy rs11602802 was used. The rs11603634 asthma risk allele (G) is correlated with rs11602802 (A) allele. The graph shows the data for *MUC5B* mRNA expression stratified by rs11602802 genotype, the box and whiskers show the mean and IQR for each genotype. P= 0.295 (FDR).

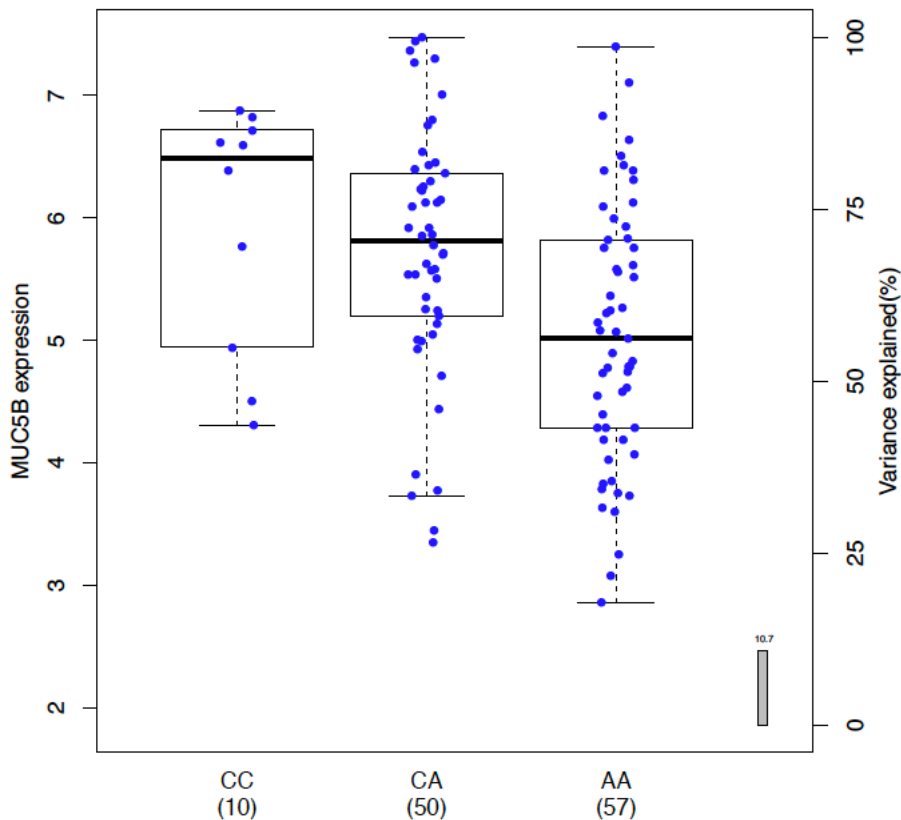

Supplementary Figure 5: KIA1109 expression in the human lung. Bronchial epithelial cells show low level expression that is cytoplasmic/membranous. Figure from Protein Atlas (see <https://www.proteinatlas.org/ENSG00000138688-KIAA1109/tissue/bronchus#img>).

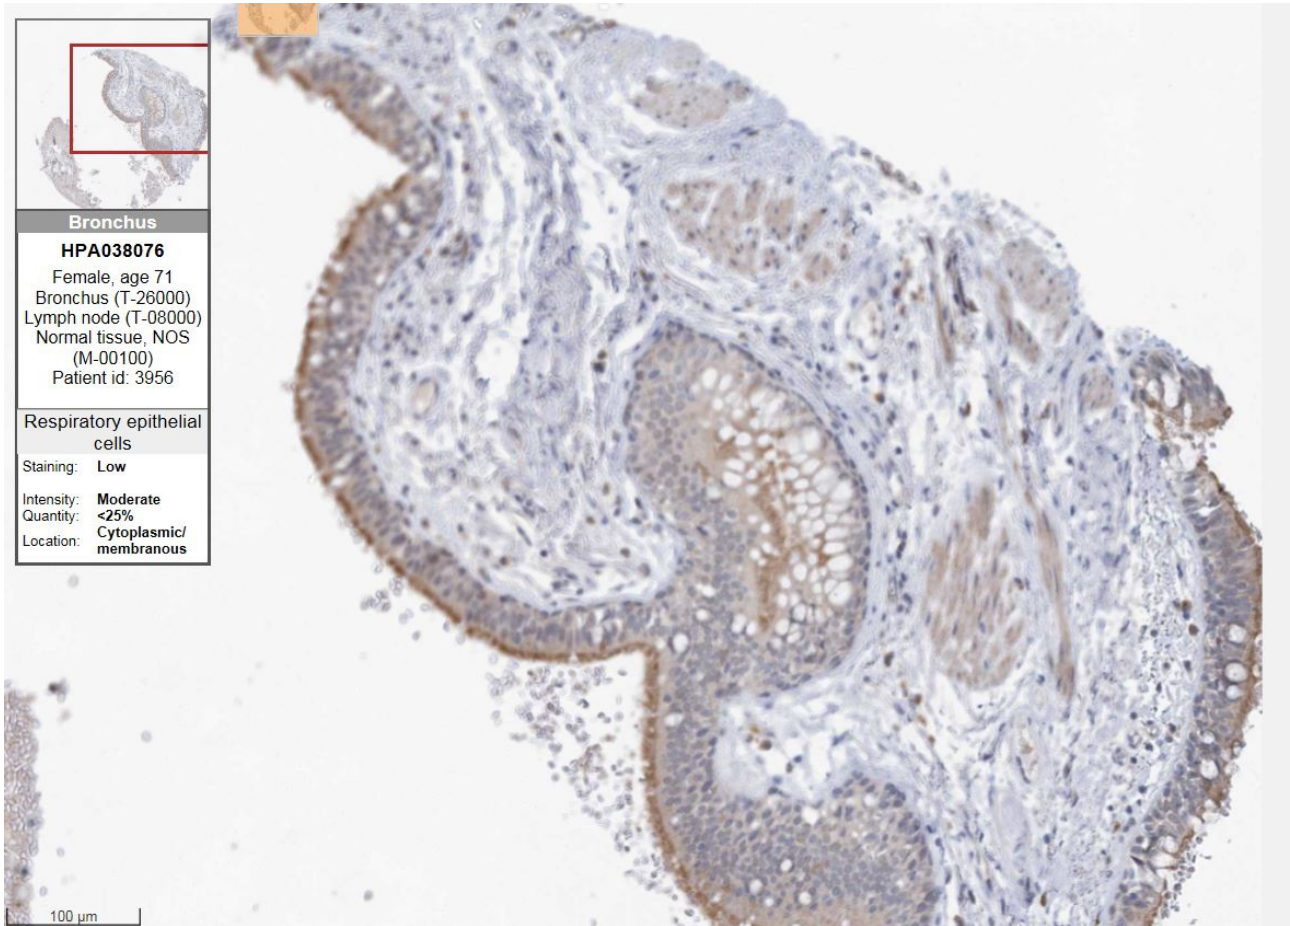

Supplementary Figure 6: MUC5AC expression in the human lung. Bronchial epithelial cells show high level expression that is cytoplasmic/membranous. Figure from Protein Atlas (see <https://www.proteinatlas.org/ENSG00000215182-MUC5AC/tissue/bronchus#img>).

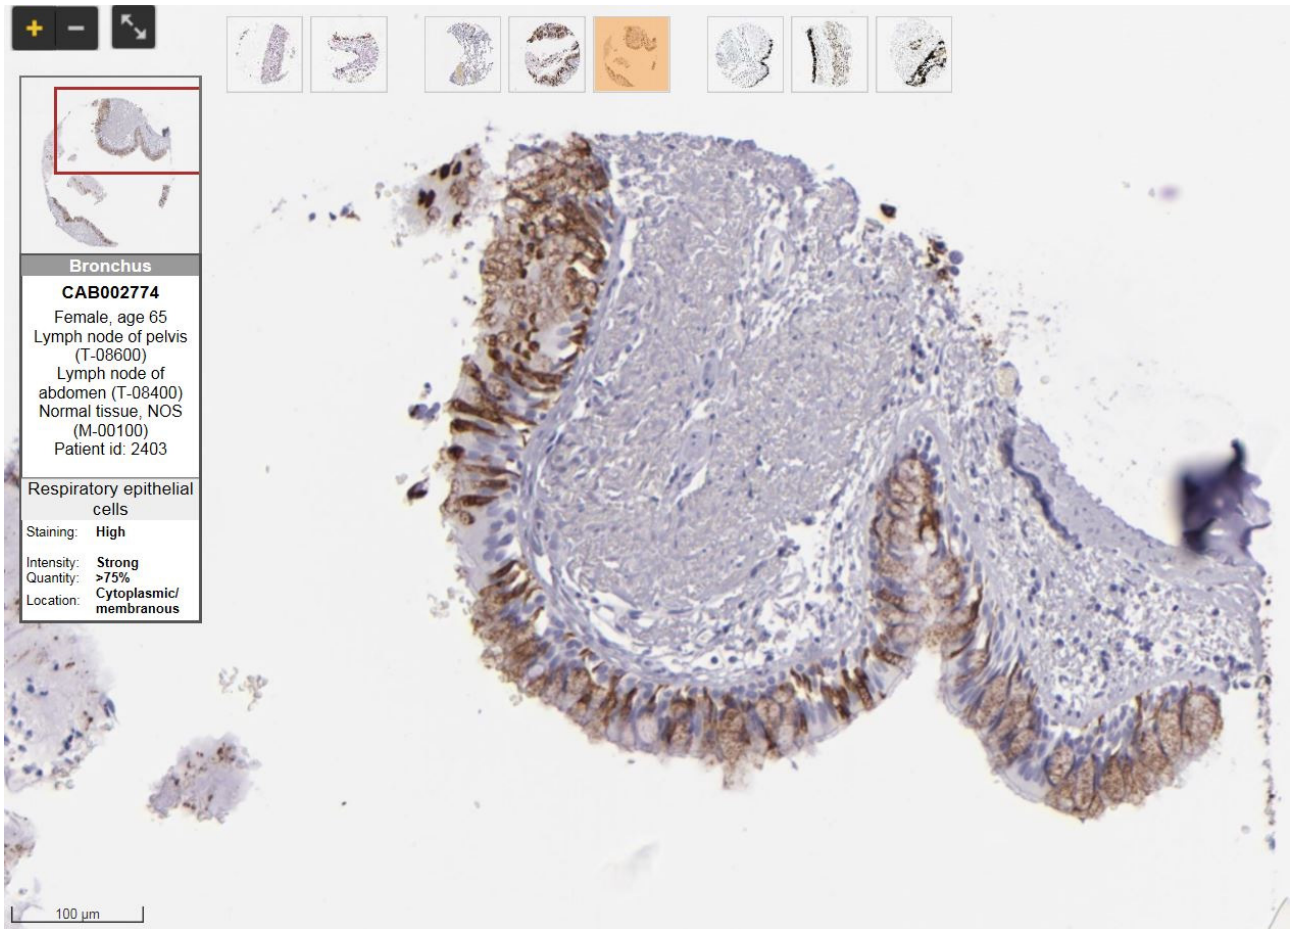

Supplementary Table 1: Summary of results for 32 variants associated with susceptibility to moderate-severe asthma in stage 1 discovery GWAS ( $P < 10^{-6}$ ) and analysed in Stage 2 and Meta-analysis. In Stage 1 the P value is bold if it is genome-wide significant ( $P < 5 \times 10^{-8}$ ; 21 variants). In the Stage 2 columns the OR is bold if there is a consistent direction of effect with stage 1 (30 variants) and the P value is bold if it is nominally significant ( $P < 0.05$ ; 26 variants). The meta-analysis P value is bold if it is genome-wide significant ( $P < 5 \times 10^{-8}$ ; 25 variants).

| Chr             | Position    | Variant     | Locus               | Non-coded | coded | Minor allele | condition | MAF    | Stage 1          |                 | Stage 2                 |                 | Meta             |                 |
|-----------------|-------------|-------------|---------------------|-----------|-------|--------------|-----------|--------|------------------|-----------------|-------------------------|-----------------|------------------|-----------------|
|                 |             |             |                     |           |       |              |           |        | OR [95% CI]      | P               | OR [95% CI]             | P               | OR [95% CI]      | P               |
| <b>Novel</b>    |             |             |                     |           |       |              |           |        |                  |                 |                         |                 |                  |                 |
| 1               | 8,501,786   | rs301819    | <i>RERE</i>         | A         | G     | A            |           | 40.90% | 1.12 [1.07-1.17] | 2.84E-07        | <b>1.05 [1.00-1.10]</b> | <b>2.89E-02</b> | 1.08 [1.05-1.12] | 2.66E-07        |
| 1               | 12,144,801  | rs137907825 | <i>TNFRSF8</i>      | CTG       | C     | C            |           | 27.89% | 1.13 [1.08-1.18] | 8.78E-07        | <b>1.03 [0.98-1.08]</b> | 2.78E-01        | 1.08 [1.04-1.11] | 2.38E-05        |
| 1               | 111,890,568 | rs147639436 | <i>PIFO</i>         | A         | G     | G            |           | 1.43%  | 1.67 [1.38-2.02] | 1.31E-07        | 0.96 [0.80-1.16]        | 6.94E-01        | 1.25 [1.10-1.43] | 7.43E-04        |
| 1               | 152,285,861 | rs61816761  | <i>FLG</i>          | G         | A     | A            |           | 2.37%  | 1.50 [1.28-1.76] | 4.70E-07        | <b>1.26 [1.09-1.45]</b> | <b>2.18E-03</b> | 1.36 [1.22-1.51] | <b>1.18E-08</b> |
| 4               | 123,055,701 | rs560026225 | <i>KIAA1109</i>     | G         | GATT  | GATT         |           | 23.60% | 1.15 [1.09-1.21] | 4.62E-07        | <b>1.09 [1.04-1.15]</b> | <b>7.50E-04</b> | 1.12 [1.08-1.16] | <b>3.06E-09</b> |
| 5               | 180,078,030 | rs551660440 | <i>FLT4</i>         | G         | A     | A            |           | 0.79%  | 2.08 [1.56-2.79] | 7.46E-07        | <b>1.01 [0.80-1.28]</b> | 9.31E-01        | 1.35 [1.12-1.62] | 1.45E-03        |
| 7               | 46,682,176  | rs56192946  | <i>TNS3</i>         | C         | T     | T            |           | 18.27% | 0.87 [0.82-0.92] | 6.50E-07        | <b>0.97 [0.92-1.03]</b> | 3.25E-01        | 0.92 [0.88-0.96] | 3.22E-05        |
| 9               | 140,853,067 | rs551372748 | <i>CACNA1B</i>      | A         | G     | G            |           | 0.72%  | 2.34 [1.70-3.22] | 1.72E-07        | 0.90 [0.67-1.20]        | 4.67E-01        | 1.39 [1.12-1.72] | 2.80E-03        |
| 10              | 8,115,362   | rs10905284  | <i>GATA3</i>        | C         | A     | C            |           | 42.94% | 0.87 [0.84-0.91] | <b>2.01E-09</b> | <b>0.94 [0.90-0.98]</b> | <b>2.25E-03</b> | 0.90 [0.88-0.93] | <b>1.76E-10</b> |
| 11              | 1,136,478   | rs11603634  | <i>MUC5AC</i>       | A         | G     | A            |           | 49.64% | 1.13 [1.08-1.18] | <b>2.30E-08</b> | <b>1.05 [1.01-1.10]</b> | <b>1.82E-02</b> | 1.09 [1.06-1.12] | <b>2.32E-08</b> |
| 13              | 100,112,522 | rs9517738   | <i>LINC01232</i>    | G         | A     | G            |           | 29.76% | 1.13 [1.08-1.19] | 3.32E-07        | <b>1.04 [0.99-1.09]</b> | 1.31E-01        | 1.08 [1.05-1.12] | 3.24E-06        |
| <b>Previous</b> |             |             |                     |           |       |              |           |        |                  |                 |                         |                 |                  |                 |
| 1               | 167,427,247 | rs7523907   | <i>CD247</i>        | C         | T     | C            |           | 45.92% | 1.14 [1.10-1.20] | <b>1.64E-09</b> | <b>1.05 [1.01-1.10]</b> | <b>2.11E-02</b> | 1.10 [1.06-1.13] | <b>4.82E-09</b> |
| 2               | 102,949,161 | rs12479210  | <i>IL1RL1</i>       | C         | T     | T            |           | 38.73% | 1.20 [1.15-1.26] | <b>4.77E-16</b> | <b>1.19 [1.14-1.24]</b> | <b>4.82E-15</b> | 1.19 [1.16-1.23] | <b>1.57E-29</b> |
| 2               | 242,698,640 | rs34290285  | <i>D2HGDH</i>       | G         | A     | A            |           | 25.74% | 0.82 [0.78-0.87] | <b>1.41E-14</b> | <b>0.85 [0.81-0.89]</b> | <b>1.16E-10</b> | 0.84 [0.81-0.87] | <b>2.24E-23</b> |
| 5               | 110,401,872 | rs1837253   | <i>TSLP</i>         | T         | C     | T            |           | 25.84% | 1.24 [1.18-1.30] | <b>8.49E-18</b> | <b>1.14 [1.08-1.20]</b> | <b>1.75E-07</b> | 1.19 [1.15-1.23] | <b>1.95E-22</b> |
| 5               | 110,467,499 | rs1438673   | <i>WDR36</i>        | C         | T     | T            | rs1837253 | 49.22% | 0.87 [0.84-0.91] | <b>2.35E-09</b> | <b>0.91 [0.87-0.95]</b> | <b>1.33E-05</b> | 0.89 [0.86-0.92] | <b>3.29E-13</b> |
| 5               | 131,799,626 | rs3749833   | <i>C5orf56</i>      | T         | C     | C            |           | 26.08% | 1.17 [1.12-1.23] | <b>1.14E-10</b> | <b>1.11 [1.06-1.16]</b> | <b>2.69E-05</b> | 1.14 [1.10-1.18] | <b>5.60E-14</b> |
| 5               | 131,887,986 | rs1986009   | <i>RAD50</i>        | C         | A     | A            | rs3749833 | 18.71% | 1.18 [1.11-1.24] | <b>1.39E-08</b> | <b>1.16 [1.10-1.23]</b> | <b>4.11E-08</b> | 1.17 [1.13-1.22] | <b>2.43E-15</b> |
| 6               | 32,581,739  | rs776111176 | <i>HLA-DQA1</i>     | A         | AAT   | A            | rs9273410 | 14.85% | 0.82 [0.77-0.88] | <b>1.81E-08</b> | <b>0.85 [0.81-0.90]</b> | <b>2.62E-09</b> | 0.84 [0.81-0.88] | <b>2.61E-16</b> |
| 6               | 32,627,250  | rs9273410   | <i>HLA-DQB1</i>     | C         | A     | C            |           | 44.70% | 1.26 [1.20-1.32] | <b>1.07E-24</b> | <b>1.16 [1.11-1.21]</b> | <b>2.14E-10</b> | 1.21 [1.17-1.25] | <b>5.62E-32</b> |
| 6               | 91,001,332  | rs367983479 | <i>BACH2</i>        | CA        | C     | C            |           | 38.50% | 0.88 [0.85-0.93] | 7.12E-08        | <b>0.92 [0.88-0.96]</b> | <b>1.12E-04</b> | 0.90 [0.87-0.93] | <b>6.30E-11</b> |
| 8               | 81,266,924  | rs71266076  | <i>MIR5708</i>      | C         | CT    | C            |           | 36.93% | 0.87 [0.83-0.91] | <b>4.21E-09</b> | <b>0.91 [0.87-0.95]</b> | <b>1.57E-05</b> | 0.89 [0.86-0.92] | <b>6.53E-13</b> |
| 9               | 6,208,030   | rs144829310 | <i>IL33</i>         | G         | T     | T            |           | 16.40% | 1.23 [1.16-1.30] | <b>3.68E-12</b> | <b>1.19 [1.13-1.26]</b> | <b>1.12E-09</b> | 1.21 [1.16-1.26] | <b>2.29E-20</b> |
| 10              | 9,043,404   | rs61840192  | <i>LOC101928272</i> | G         | A     | A            |           | 42.70% | 0.85 [0.81-0.88] | <b>8.42E-14</b> | <b>0.86 [0.82-0.89]</b> | <b>1.14E-12</b> | 0.85 [0.83-0.88] | <b>8.33E-25</b> |
| 11              | 76,293,726  | rs7936312   | <i>C11orf30</i>     | G         | T     | T            |           | 47.42% | 1.14 [1.10-1.19] | <b>1.09E-09</b> | <b>1.19 [1.14-1.24]</b> | <b>3.38E-16</b> | 1.17 [1.13-1.20] | <b>6.18E-24</b> |
| 12              | 56,449,875  | rs7305461   | <i>RPS26</i>        | A         | C     | A            |           | 44.61% | 0.88 [0.84-0.92] | <b>1.65E-08</b> | <b>0.94 [0.90-0.98]</b> | <b>2.51E-03</b> | 0.91 [0.88-0.94] | <b>1.01E-09</b> |
| 12              | 57,497,005  | rs703816    | <i>STAT6</i>        | T         | C     | C            |           | 43.41% | 1.16 [1.11-1.21] | <b>1.18E-11</b> | <b>1.08 [1.03-1.13]</b> | <b>4.31E-04</b> | 1.12 [1.09-1.15] | <b>3.69E-13</b> |
| 15              | 61,068,704  | rs10519068  | <i>RORA</i>         | G         | A     | A            |           | 12.75% | 0.85 [0.79-0.90] | 4.81E-07        | <b>0.85 [0.79-0.90]</b> | <b>5.76E-07</b> | 0.85 [0.81-0.89] | <b>1.84E-12</b> |
| 15              | 67,441,750  | rs72743461  | <i>SMAD3</i>        | C         | A     | A            |           | 23.60% | 1.18 [1.12-1.24] | <b>1.03E-10</b> | <b>1.11 [1.06-1.17]</b> | <b>2.35E-05</b> | 1.14 [1.11-1.19] | <b>4.52E-14</b> |
| 16              | 11,230,703  | rs7203459   | <i>CLEC16A</i>      | T         | C     | C            |           | 24.56% | 0.81 [0.77-0.86] | <b>7.83E-16</b> | <b>0.90 [0.85-0.94]</b> | <b>2.33E-05</b> | 0.86 [0.83-0.89] | <b>4.37E-18</b> |
| 17              | 37,910,368  | rs2941522   | <i>IKZF3</i>        | C         | T     | T            |           | 48.29% | 1.13 [1.08-1.18] | <b>1.46E-08</b> | <b>1.10 [1.05-1.14]</b> | <b>1.97E-05</b> | 1.11 [1.08-1.15] | <b>2.32E-12</b> |
| 17              | 47,439,302  | rs112502960 | <i>ZNF652</i>       | G         | A     | A            |           | 35.92% | 1.14 [1.09-1.20] | <b>6.05E-09</b> | <b>1.08 [1.04-1.13]</b> | <b>3.92E-04</b> | 1.11 [1.08-1.15] | <b>4.12E-11</b> |

Supplementary Table 2: Summary of results for stage 2a sensitivity analysis (controls with atopy) for variants associated with susceptibility to moderate-severe asthma in stage 1 discovery GWAS ( $P < 10^{-6}$ ). In the Stage 2a columns the OR is bold if there is a consistent direction of effect with stage 1 (30 variants) and the P value is bold if it is nominally significant ( $P < 0.05$ ; 25 variants). The meta-analysis P value is bold if it is genome-wide significant ( $P < 5 \times 10^{-8}$ ; 24 variants).

| Chr             | Position    | Variant     | Locus               | Non-coded | coded | Minor allele | condition | MAF    | rsid.ukb (proxy r <sup>2</sup> ) | Stage 2a                |                 | Meta-analysis    |                 |
|-----------------|-------------|-------------|---------------------|-----------|-------|--------------|-----------|--------|----------------------------------|-------------------------|-----------------|------------------|-----------------|
|                 |             |             |                     |           |       |              |           |        |                                  | OR [95% CI]             | P               | OR [95% CI]      | P               |
| <b>Novel</b>    |             |             |                     |           |       |              |           |        |                                  |                         |                 |                  |                 |
| 1               | 8,501,786   | rs301819    | <i>RERE</i>         | A         | G     | A            |           | 40.90% | rs301819                         | <b>1.04 [1.00-1.09]</b> | 6.85E-02        | 1.08 [1.05-1.11] | 1.15E-06        |
| 1               | 12,144,801  | rs137907825 | <i>TNFRSF8</i>      | CTG       | C     | C            |           | 27.89% | rs12133231 (1.00)                | <b>1.03 [0.98-1.08]</b> | 2.18E-01        | 1.08 [1.04-1.11] | 1.68E-05        |
| 1               | 111,890,568 | rs147639436 | <i>PIFO</i>         | A         | G     | G            |           | 1.43%  | rs147639436                      | 0.95 [0.79-1.13]        | 5.68E-01        | 1.24 [1.09-1.41] | 1.39E-03        |
| 1               | 152,285,861 | rs61816761  | <i>FLG</i>          | G         | A     | A            |           | 2.37%  | rs61816761                       | <b>1.19 [1.04-1.37]</b> | <b>1.17E-02</b> | 1.32 [1.19-1.46] | 1.81E-07        |
| 4               | 123,055,701 | rs560026225 | <i>KIAA1109</i>     | G         | GATT  | GATT         |           | 23.60% | rs72687036 (0.66)                | <b>1.08 [1.02-1.13]</b> | <b>3.54E-03</b> | 1.11 [1.07-1.15] | <b>2.59E-08</b> |
| 5               | 180,078,030 | rs551660440 | <i>FLT4</i>         | G         | A     | A            |           | 0.79%  | rs143214597 (0.70)               | <b>0.98 [0.78-1.23]</b> | 8.42E-01        | 1.31 [1.09-1.57] | 3.51E-03        |
| 7               | 46,682,176  | rs56192946  | <i>TNS3</i>         | C         | T     | T            |           | 18.27% | rs56192946                       | <b>0.97 [0.92-1.03]</b> | 3.07E-01        | 0.92 [0.89-0.96] | 3.23E-05        |
| 9               | 140,853,067 | rs551372748 | <i>CACNA1B</i>      | A         | G     | G            |           | 0.72%  | rs551372748                      | 0.93 [0.70-1.24]        | 6.30E-01        | 1.40 [1.13-1.73] | 1.78E-03        |
| 10              | 8,115,362   | rs10905284  | <i>GATA3</i>        | C         | A     | C            |           | 42.94% | rs10905284                       | <b>0.94 [0.90-0.98]</b> | <b>3.69E-03</b> | 0.91 [0.88-0.94] | <b>4.15E-10</b> |
| 11              | 1,136,478   | rs11603634  | <i>MUC5AC</i>       | A         | G     | A            |           | 49.64% | rs11603634                       | <b>1.05 [1.01-1.09]</b> | <b>2.54E-02</b> | 1.09 [1.06-1.12] | <b>4.48E-08</b> |
| 13              | 100,112,522 | rs9517738   | <i>LINC01232</i>    | G         | A     | G            |           | 29.76% | rs9517738                        | <b>1.03 [0.98-1.08]</b> | 2.38E-01        | 1.08 [1.04-1.11] | 1.14E-05        |
| <b>Previous</b> |             |             |                     |           |       |              |           |        |                                  |                         |                 |                  |                 |
| 1               | 167,427,247 | rs7523907   | <i>CD247</i>        | C         | T     | C            |           | 45.92% | rs7523907                        | <b>1.05 [1.00-1.09]</b> | <b>3.65E-02</b> | 1.09 [1.06-1.12] | <b>1.46E-08</b> |
| 2               | 102,949,161 | rs12479210  | <i>IL1RL1</i>       | C         | T     | T            |           | 38.73% | rs12479210                       | <b>1.17 [1.12-1.22]</b> | <b>2.39E-13</b> | 1.18 [1.15-1.22] | <b>1.14E-27</b> |
| 2               | 242,698,640 | rs34290285  | <i>D2HGDH</i>       | G         | A     | A            |           | 25.74% | rs34290285                       | <b>0.86 [0.82-0.91]</b> | <b>3.36E-09</b> | 0.84 [0.81-0.87] | <b>6.71E-22</b> |
| 5               | 110,401,872 | rs1837253   | <i>TSLP</i>         | T         | C     | T            |           | 25.84% | rs1837253                        | <b>1.15 [1.09-1.20]</b> | <b>3.87E-08</b> | 1.19 [1.15-1.23] | <b>2.70E-23</b> |
| 5               | 110,467,499 | rs1438673   | <i>WDR36</i>        | C         | T     | T            | rs1837253 | 49.22% | rs1438673                        | <b>0.91 [0.87-0.94]</b> | <b>3.33E-06</b> | 0.89 [0.86-0.92] | <b>7.65E-14</b> |
| 5               | 131,799,626 | rs3749833   | <i>C5orf56</i>      | T         | C     | C            |           | 26.08% | rs3749833                        | <b>1.10 [1.05-1.15]</b> | <b>7.37E-05</b> | 1.13 [1.10-1.17] | <b>2.56E-13</b> |
| 5               | 131,887,986 | rs1986009   | <i>RAD50</i>        | C         | A     | A            | rs3749833 | 18.71% | rs1986009                        | <b>1.14 [1.08-1.20]</b> | <b>8.27E-07</b> | 1.16 [1.11-1.20] | <b>7.96E-14</b> |
| 6               | 32,581,739  | rs776111176 | <i>HLA-DQA1</i>     | A         | AAT   | A            | rs9273410 | 14.85% | rs3997872 (0.82)                 | <b>0.83 [0.79-0.88]</b> | <b>1.21E-12</b> | 0.83 [0.80-0.86] | <b>1.29E-19</b> |
| 6               | 32,627,250  | rs9273410   | <i>HLA-DQB1</i>     | C         | A     | C            |           | 44.70% | rs9273410                        | <b>1.15 [1.10-1.21]</b> | <b>1.35E-10</b> | 1.21 [1.17-1.24] | <b>4.58E-32</b> |
| 6               | 91,001,332  | rs367983479 | <i>BACH2</i>        | CA        | C     | C            |           | 38.50% | rs1504215 (0.89)                 | <b>0.92 [0.88-0.96]</b> | <b>3.22E-04</b> | 0.90 [0.88-0.93] | <b>2.35E-10</b> |
| 8               | 81,266,924  | rs71266076  | <i>MIR5708</i>      | C         | CT    | C            |           | 36.93% | rs13274067 (0.97)                | <b>0.91 [0.87-0.95]</b> | <b>2.75E-05</b> | 0.89 [0.87-0.92] | <b>1.38E-12</b> |
| 9               | 6,208,030   | rs144829310 | <i>IL33</i>         | G         | T     | T            |           | 16.40% | rs144829310                      | <b>1.20 [1.13-1.26]</b> | <b>9.15E-11</b> | 1.21 [1.16-1.26] | <b>2.57E-21</b> |
| 10              | 9,043,404   | rs61840192  | <i>LOC101928272</i> | G         | A     | A            |           | 42.70% | rs1775555 (0.98)                 | <b>0.86 [0.83-0.90]</b> | <b>7.24E-12</b> | 0.86 [0.83-0.88] | <b>5.93E-24</b> |
| 11              | 76,293,726  | rs7936312   | <i>C11orf30</i>     | G         | T     | T            |           | 47.42% | rs7936312                        | <b>1.18 [1.13-1.23]</b> | <b>9.98E-15</b> | 1.16 [1.13-1.20] | <b>1.05E-22</b> |
| 12              | 56,449,875  | rs7305461   | <i>RPS26</i>        | A         | C     | A            |           | 44.61% | rs1131017 (0.98)                 | <b>0.94 [0.90-0.98]</b> | <b>4.96E-03</b> | 0.91 [0.88-0.94] | <b>3.02E-09</b> |
| 12              | 57,497,005  | rs703816    | <i>STAT6</i>        | T         | C     | C            |           | 43.41% | rs703816                         | <b>1.07 [1.03-1.12]</b> | <b>9.57E-04</b> | 1.12 [1.08-1.15] | <b>1.44E-12</b> |
| 15              | 61,068,704  | rs10519068  | <i>RORA</i>         | G         | A     | A            |           | 12.75% | rs10519068                       | <b>0.86 [0.80-0.92]</b> | <b>4.31E-06</b> | 0.85 [0.82-0.89] | <b>9.72E-12</b> |
| 15              | 67,441,750  | rs72743461  | <i>SMAD3</i>        | C         | A     | A            |           | 23.60% | rs72743461                       | <b>1.09 [1.04-1.15]</b> | <b>2.34E-04</b> | 1.13 [1.10-1.17] | <b>1.17E-12</b> |
| 16              | 11,230,703  | rs7203459   | <i>CLEC16A</i>      | T         | C     | C            |           | 24.56% | rs7203459                        | <b>0.91 [0.87-0.96]</b> | <b>3.22E-04</b> | 0.86 [0.83-0.89] | <b>2.30E-16</b> |
| 17              | 37,910,368  | rs2941522   | <i>IKZF3</i>        | C         | T     | T            |           | 48.29% | rs2941522                        | <b>1.09 [1.04-1.13]</b> | <b>8.01E-05</b> | 1.11 [1.08-1.14] | <b>1.30E-11</b> |
| 17              | 47,439,302  | rs112502960 | <i>ZNF652</i>       | G         | A     | A            |           | 35.92% | rs12952581 (0.98)                | <b>1.08 [1.03-1.13]</b> | <b>5.16E-04</b> | 1.11 [1.08-1.14] | <b>6.71E-11</b> |

Supplementary Table 3: Summary of stage 1 results for variants previously associated with asthma susceptibility in GWAS (2007-2018)

| Reported SNP | CHR | BP          | Phenotype                               | Gene reported                | Ancestry               | #rsid                         | R2 | noncoded | coded | coded freq. | INFO   | OR [95% CI]      | P                | GWAS reported     |
|--------------|-----|-------------|-----------------------------------------|------------------------------|------------------------|-------------------------------|----|----------|-------|-------------|--------|------------------|------------------|-------------------|
| rs662064     | 1   | 10,557,251  | Asthma                                  | <i>PEX14</i>                 | European               | rs662064                      | 1  | T        | C     | 67.82%      | 0.982  | 0.98 [0.93-1.02] | 0.34173941       | Pickrell 2016     |
| rs4129267    | 1   | 154,426,264 | Asthma                                  | <i>IL6R</i>                  | European               | Affx-5389767                  | 1  | C        | T     | 40.86%      | 1      | 1.04 [1.00-1.08] | 0.08688645       | Ferreira 2011     |
| *rs1102000   | 1   | 158,932,907 | Asthma                                  | <i>PYHIN1</i>                | African American       | ND                            | ND | ND       | ND    | ND          | ND     | ND               | ND               | Torgerson 2011    |
| rs4233366    | 1   | 161,159,147 | Asthma                                  | <i>ADAMTS4</i>               | European               | rs4233366                     | 1  | C        | T     | 26.48%      | 0.995  | 1.08 [1.03-1.14] | 0.0012221        | Pickrell 2016     |
| rs1723018    | 1   | 167,433,420 | Asthma                                  | <i>CD247</i>                 | European               | rs1723018                     | 1  | A        | G     | 40.68%      | 0.997  | 0.88 [0.84-0.92] | <b>5.27E-09</b>  | Pickrell 2016     |
| rs6691738    | 1   | 173,152,036 | Asthma                                  | <i>TNFSF18</i>               | European               | rs6691738                     | 1  | â        | G     | 30.05%      | 0.892  | 1.08 [1.03-1.14] | 0.00131315       | Pickrell 2016     |
| rs2786098    | 1   | 197,325,908 | Moderate-severe childhood asthma        | <i>DENND1B</i>               | European               | Affx-6456370                  | 1  | T        | G     | 77.97%      | 1      | 1.00 [0.95-1.05] | 0.91947932       | Sleiman 2010      |
| rs6683383    | 1   | 203,100,504 | Asthma                                  | <i>ADORA1</i>                | European               | rs6683383                     | 1  | T        | A     | 32.94%      | 0.991  | 0.97 [0.93-1.02] | 0.23183104       | Pickrell 2016     |
| rs13412757   | 2   | 8,458,080   | Asthma                                  | <i>ID2</i>                   | European               | rs13412757                    | 1  | G        | A     | 33.85%      | 0.982  | 0.91 [0.87-0.96] | <b>9.92E-05</b>  | Pickrell 2016     |
| rs1558641    | 2   | 102,765,865 | Childhood asthma + exacerbations        | <i>IL1R1</i>                 | European               | rs1558641                     | 1  | G        | A     | 15.86%      | 0.972  | 0.89 [0.84-0.94] | <b>7.39E-05</b>  | Bonnelykke 2014   |
| rs202011557  | 2   | 102,913,642 | Asthma                                  | <i>IL1RL1</i>                | European               | rs202011557:102913642:A:AAAAC | 1  | A        | AAAAC | 13.18%      | 0.96   | 0.83 [0.78-0.89] | <b>3.38E-08</b>  | Pickrell 2016     |
| rs13408661   | 2   | 102,955,082 | Asthma                                  | <i>IL1RL1/IL18R1</i>         | European               | rs13408661                    | 1  | G        | A     | 13.67%      | 0.993  | 0.84 [0.79-0.90] | <b>7.06E-08</b>  | Ramasamy 2012     |
| rs10173081   | 2   | 102,957,348 | Asthma                                  | <i>IL1RL1</i>                | European               | rs10173081                    | 1  | C        | T     | 13.79%      | 0.999  | 0.84 [0.79-0.90] | <b>6.61E-08</b>  | Torgerson 2011    |
| rs1420101    | 2   | 102,957,716 | Asthma                                  | <i>IL1RL1</i>                | European/Multiancestry | Affx-17140840                 | 1  | C        | T     | 38.37%      | 1      | 1.19 [1.14-1.25] | <b>3.21E-15</b>  | Demenaïs 2018     |
| rs1420101    | 2   | 102,957,716 | Asthma                                  | <i>IL1RL1</i>                | European               | Affx-17140840                 | 1  | C        | T     | 38.37%      | 1      | 1.19 [1.14-1.25] | <b>3.07E-15</b>  | Gudbjartsson 2009 |
| rs10197862   | 2   | 102,966,549 | Asthma + hay fever                      | <i>IL1RL1</i>                | European               | rs10197862                    | 1  | A        | G     | 13.76%      | 0.996  | 0.84 [0.79-0.89] | <b>5.83E-08</b>  | Ferreira 2014     |
| rs3771166    | 2   | 102,986,222 | Asthma                                  | <i>IL1RL1/IL18R1</i>         | European               | rs3771166                     | 1  | G        | A     | 38.10%      | 0.993  | 0.88 [0.82-0.90] | <b>2.54E-11</b>  | Moffatt 2010      |
| rs34290285   | 2   | 242,698,640 | Asthma                                  | <i>D2HGDH</i>                | European               | rs34290285                    | 1  | G        | A     | 25.74%      | 0.995  | 0.82 [0.79-0.87] | <b>1.41E-14</b>  | Pickrell 2016     |
| rs73196739   | 3   | 188,402,471 | Asthma                                  | <i>LPP</i>                   | European               | Affx-21876745                 | 1  | C        | T     | 16.59%      | 1      | 0.94 [0.88-0.99] | 0.02294229       | Pickrell 2016     |
| rs5743618    | 4   | 38,798,648  | Asthma                                  | <i>TLR1</i>                  | European               | rs5743618:38798648:C:A        | 1  | C        | A     | 22.87%      | 0.988  | 0.93 [0.88-0.98] | 0.00461438       | Pickrell 2016     |
| rs4833095    | 4   | 38,799,710  | Asthma + hay fever                      | <i>TLR1</i>                  | European               | Affx-24449268                 | 1  | T        | C     | 20.13%      | 1      | 0.92 [0.87-0.97] | 0.00209226       | Ferreira 2014     |
| rs7686660    | 4   | 144,003,159 | Asthma                                  | <i>USP38</i>                 | Japanese               | Affx-23554961                 | 1  | T        | G     | 25.60%      | 1      | 0.94 [0.90-0.99] | 0.0139806        | Hirota 2011       |
| rs1588265    | 5   | 59,369,794  | Mild-moderate childhood asthma with BHR | <i>PDE4D</i>                 | European               | Affx-26773647                 | 1  | A        | G     | 31.76%      | 1      | 0.97 [0.92-1.01] | 0.14276726       | Himes 2009        |
| rs1837253    | 5   | 110,401,872 | Asthma                                  | <i>TSLP</i>                  | European               | Affx-25366072                 | 1  | T        | C     | 74.16%      | 1      | 1.24 [1.18-1.30] | <b>8.49E-18</b>  | Torgerson 2011    |
| rs1837253    | 5   | 110,401,872 | Asthma                                  | <i>TSLP</i>                  | Japanese               | Affx-25366072                 | 1  | T        | C     | 74.16%      | 1      | 1.24 [1.18-1.30] | <b>8.49E-18</b>  | Hirota 2011       |
| rs1837253    | 5   | 110,401,872 | Asthma + hay fever                      | <i>TSLP</i>                  | European               | Affx-25366072                 | 1  | T        | C     | 74.16%      | 1      | 1.24 [1.18-1.30] | <b>8.49E-18</b>  | Ferreira 2014     |
| rs1837253    | 5   | 110,401,872 | Asthma                                  | <i>TSLP</i>                  | European               | Affx-25366072                 | 1  | T        | C     | 74.16%      | 1      | 1.24 [1.18-1.30] | <b>8.49E-18</b>  | Pickrell 2016     |
| rs10455025   | 5   | 110,404,999 | Asthma                                  | <i>SLC225A46, TSLP</i>       | European/Multiancestry | rs10455025                    | 1  | A        | C     | 35.74%      | 0.9959 | 1.19 [1.14-1.24] | <b>3.74E-14</b>  | Demenaïs 2018     |
| rs2416257    | 5   | 110,435,490 | Asthma                                  | <i>WDR36</i>                 | European               | Affx-25366478                 | 1  | C        | T     | 13.89%      | 1      | 0.89 [0.84-0.95] | <b>0.0005117</b> | Gudbjartsson 2009 |
| rs1438673    | 5   | 110,467,499 | Asthma + hay fever                      | <i>WDR36</i>                 | European               | rs1438673                     | 1  | C        | T     | 49.22%      | 0.969  | 0.84 [0.81-0.88] | <b>2.11E-14</b>  | Ferreira 2014     |
| rs2244012    | 5   | 131,901,225 | Asthma                                  | <i>RAD50</i>                 | European               | Affx-25638647                 | 1  | A        | G     | 19.46%      | 1      | 1.13 [1.07-1.19] | <b>7.53E-06</b>  | Pickrell 2016     |
| rs6871536    | 5   | 131,969,874 | Childhood asthma + exacerbations        | <i>RAD50</i>                 | European               | rs6871536                     | 1  | T        | C     | 19.17%      | 0.995  | 1.13 [1.07-1.20] | <b>7.11E-06</b>  | Bonnelykke 2014   |
| rs20541      | 5   | 131,995,964 | Asthma                                  | <i>IL13, RAD50, IL4</i>      | European/Multiancestry | Affx-25639687                 | 1  | A        | G     | 81.50%      | 1      | 0.85 [0.80-0.88] | <b>8.47E-09</b>  | Demenaïs 2018     |
| rs7705042    | 5   | 141,492,419 | Asthma                                  | <i>NDFIP1, GNDPA1, SPRY4</i> | Multiancestry          | rs7705042                     | 1  | C        | A     | 61.85%      | 1      | 1.08 [1.04-1.13] | <b>4.43E-04</b>  | Demenaïs 2018     |
| *rs200634877 | 5   | 141,529,761 | Asthma                                  | <i>NDFIP1</i>                | European               | ND                            | ND | ND       | ND    | ND          | ND     | ND               | ND               | Pickrell 2016     |
| rs1233578    | 6   | 28,712,247  | Asthma                                  | <i>GPX5, TRIM27</i>          | European               | rs1233578                     | 1  | A        | G     | 17.51%      | 0.9994 | 1.04 [0.98-1.10] | 1.76E-01         | Demenaïs 2018     |
| rs2428494    | 6   | 31,322,197  | Asthma                                  | <i>HLAC</i>                  | European               | rs2428494:31322197:T:A        | 1  | T        | A     | 47.91%      | 0.997  | 1.15 [1.10-1.20] | <b>5.04E-10</b>  | Pickrell 2016     |
| rs404860     | 6   | 32,184,345  | Asthma                                  | <i>NOTCH4</i>                | Japanese               | Affx-28468816                 | 1  | T        | C     | 17.77%      | 1      | 1.00 [0.95-1.06] | 0.89916188       | Hirota 2011       |
| rs2855812    | 6   | 31472720    | Asthma                                  | <i>MICB, HCP5, MCCD1</i>     | European/Multiancestry | Affx-28458189                 | 1  | G        | T     | 26.06%      | 1      | 1.09 [1.04-1.15] | <b>3.72E-04</b>  | Demenaïs 2018     |
| rs3104367    | 6   | 32,603,487  | Asthma                                  | <i>HLADRB5</i>               | European               | rs3104367:32603487:T:C        | 1  | T        | C     | 62.08%      | 0.956  | 1.22 [1.17-1.28] | <b>1.47E-18</b>  | Pickrell 2016     |
| rs9272346    | 6   | 32,604,372  | Asthma                                  | <i>HLADRB1, HLADQA1</i>      | European/Multiancestry | rs9272346                     | 1  | G        | A     | 61.45%      | 0.9462 | 1.22 [1.16-1.27] | <b>1.17E-17</b>  | Demenaïs 2018     |
| rs9273373    | 6   | 32,626,601  | Asthma + hay fever                      | <i>HLA-DQB1</i>              | European               | rs9273373:32626601:A:G        | 1  | A        | G     | 60.62%      | 0.995  | 1.24 [1.18-1.29] | <b>3.12E-21</b>  | Ferreira 2014     |



| Reported SNP | CHR | BP          | Phenotype                        | Gene reported               | Ancestry               | #rsid         | R2    | noncoded | coded | coded freq. | INFO   | OR [95% CI]      | P               | GWAS reported   |
|--------------|-----|-------------|----------------------------------|-----------------------------|------------------------|---------------|-------|----------|-------|-------------|--------|------------------|-----------------|-----------------|
| rs987870     | 6   | 33,042,880  | Childhood onset asthma           | <i>HLA-DPA1</i>             | Japanese               | Affx-28513044 | 1     | A        | G     | 14.48%      | 1      | 1.03 [0.97-1.09] | 0.42324422      | Noguchi 2011    |
| rs1776883    | 6   | 34,156,444  | Asthma                           | <i>GRM4</i>                 | European               | rs1776883     | 1     | C        | T     | 53.25%      | 0.973  | 0.98 [0.94-1.02] | 0.32358767      | Almoguera 2016  |
| rs58521088   | 6   | 90,985,198  | Asthma                           | <i>BACH2</i>                | European               | rs58521088    | 1     | A        | T     | 35.54%      | 0.997  | 0.88 [0.85-0.93] | <b>1.06E-07</b> | Pickrell 2016   |
| rs2325291    | 6   | 90,986,686  | Asthma                           | <i>BACH2, GJA10, MAP3K7</i> | European/Multiancestry | rs2325291     | 1     | G        | A     | 35.53%      | 0.9974 | 0.89 [0.85-0.93] | <b>1.32E-07</b> | Demenaïs 2018   |
| rs6967330    | 7   | 105,658,451 | Childhood asthma + exacerbations | <i>CDHR3</i>                | European               | Affx-29418884 | 1     | G        | A     | 16.64%      | 1      | 1.04 [0.98-1.10] | 0.20843707      | Bonnelykke 2014 |
| rs6959584    | 7   | 105,676,505 | Asthma                           | <i>CDHR3</i>                | European               | rs6959584     | 1     | C        | T     | 12.89%      | 0.989  | 1.06 [1.00-1.13] | 0.06402029      | Pickrell 2016   |
| rs3019885    | 8   | 18,025,645  | Childhood onset asthma           | <i>SLC30A8</i>              | Japanese               | rs2047963     | 0.996 | T        | C     | 45.37%      | 0.999  | 0.97 [0.93-1.01] | 0.10761244      | Noguchi 2011    |
| rs12543811   | 8   | 81,278,885  | Asthma                           | <i>TPD52, ZBTB10</i>        | European/Multiancestry | rs12543811    | 1     | G        | A     | 64.95%      | 0.9925 | 0.88 [0.84-0.92] | <b>5.39E-08</b> | Demenaïs 2018   |
| rs10957978   | 8   | 81,285,139  | Asthma                           | <i>ZBTB10</i>               | European               | rs10957978    | 1     | G        | T     | 64.49%      | 0.984  | 0.89 [0.85-0.93] | <b>2.46E-07</b> | Pickrell 2016   |
| rs7009110    | 8   | 81,291,879  | Asthma + hay fever               | <i>ZBTB10</i>               | European               | rs7009110     | 1     | T        | C     | 61.65%      | 0.994  | 0.88 [0.85-0.92] | <b>6.92E-08</b> | Ferreira 2014   |
| rs72699186   | 9   | 6,175,855   | Asthma + hay fever               | <i>IL33</i>                 | European               | rs72699186    | 1     | A        | T     | 16.44%      | 0.991  | 1.23 [1.16-1.30] | <b>8.38E-12</b> | Ferreira 2014   |
| rs1342326    | 9   | 6,190,076   | Asthma                           | <i>IL33</i>                 | European               | Affx-33938382 | 1     | A        | C     | 16.62%      | 1      | 1.22 [1.15-1.29] | <b>2.06E-11</b> | Moffatt 2010    |
| rs2381416    | 9   | 6,193,455   | Asthma                           | <i>IL33</i>                 | European               | Affx-33938420 | 1     | C        | A     | 73.63%      | 1      | 0.85 [0.81-0.89] | <b>1.60E-11</b> | Torgerson 2011  |
| rs144829310  | 9   | 6,208,030   | Asthma                           | <i>IL33</i>                 | European               | rs144829310   | 1     | G        | T     | 16.40%      | 0.991  | 1.23 [1.16-1.30] | <b>3.68E-12</b> | Pickrell 2016   |
| rs992969     | 9   | 6,209,697   | Asthma                           | <i>RANBP6, IL33</i>         | European/Multiancestry | rs992969      | 1     | A        | G     | 74.68%      | 0.9901 | 0.84 [0.80-0.88] | <b>5.95E-12</b> | Demenaïs 2018   |
| rs928413     | 9   | 6,213,387   | Childhood asthma + exacerbations | <i>IL33</i>                 | European               | rs928413      | 1     | G        | A     | 74.09%      | 0.984  | 0.84 [0.80-0.89] | <b>1.53E-11</b> | Bonnelykke 2014 |
| rs72721168   | 9   | 27,308,288  | Asthma                           | <i>EQTN</i>                 | European               | rs72721168    | 1     | A        | C     | 3.71%       | 0.991  | 1.05 [0.94-1.18] | 0.37310685      | Almoguera 2016  |
| rs10508372   | 10  | 8,972,018   | Asthma                           | <i>GATA3</i>                | Japanese               | Affx-3813772  | 1     | G        | A     | 5.17%       | 1      | 0.95 [0.85-1.03] | 0.18978182      | Hirota 2011     |
| rs2589561    | 10  | 9,046,645   | Asthma                           | <i>GATA3, CELF2</i>         | European/Multiancestry | rs2589561     | 1     | A        | G     | 80.26%      | 0.9176 | 0.87 [0.82-0.92] | <b>7.32E-07</b> | Demenaïs 2018   |
| rs12413578   | 10  | 9,049,253   | Asthma                           | <i>GATA3</i>                | European               | Affx-3823389  | 1     | C        | T     | 10.42%      | 1      | 0.77 [0.73-0.84] | <b>2.38E-11</b> | Pickrell 2016   |
| rs7130588    | 11  | 76,270,683  | Asthma                           | <i>LRRC32</i>               | European               | Affx-5959929  | 1     | A        | G     | 35.95%      | 1      | 1.12 [1.07-1.17] | <b>6.68E-07</b> | Ferreira 2011   |
| rs7936323    | 11  | 76,293,758  | Asthma                           | <i>C11orf30</i>             | European               | rs7936323     | 1     | G        | A     | 47.45%      | 0.998  | 1.14 [1.10-1.19] | <b>1.22E-09</b> | Pickrell 2016   |
| rs2155219    | 11  | 76,299,194  | Asthma + hay fever               | <i>LRRC32</i>               | European               | Affx-5960597  | 1     | G        | T     | 50.01%      | 1      | 1.13 [1.08-1.18] | <b>4.40E-08</b> | Ferreira 2014   |
| rs7927894    | 11  | 76,301,316  | Asthma                           | <i>EMSY, LRRC32</i>         | European/Multiancestry | Affx-5960642  | 1     | C        | T     | 38.94%      | 1      | 1.14 [1.09-1.19] | <b>1.51E-08</b> | Demenaïs 2018   |
| rs1701704    | 12  | 56,412,487  | Asthma                           | <i>IKZF4</i>                | Japanese               | Affx-8212375  | 1     | T        | G     | 34.24%      | 1      | 1.11 [1.06-1.16] | <b>1.16E-05</b> | Hirota 2011     |
| rs167769     | 12  | 57,503,775  | Asthma                           | <i>STAT6, NAB2, LRP1</i>    | Multiancestry          | Affx-8225554  | 1     | C        | T     | 40.13%      | 1      | 1.15 [1.11-1.21] | <b>1.58E-10</b> | Demenaïs 2018   |
| rs3001426    | 12  | 57,509,055  | Asthma                           | <i>STAT6</i>                | European               | rs3001426     | 1     | T        | C     | 45.67%      | 0.984  | 1.14 [1.09-1.19] | <b>3.94E-09</b> | Pickrell 2016   |
| rs3784099    | 14  | 68,749,927  | Asthma                           | <i>RAD51B</i>               | European               | Affx-10832504 | 1     | G        | A     | 27.81%      | 1      | 1.06 [1.01-1.11] | 0.01229815      | Pickrell 2016   |
| rs10519068   | 15  | 61,068,704  | Asthma                           | <i>RORA</i>                 | European               | rs10519068    | 1     | G        | A     | 12.75%      | 0.997  | 0.85 [0.80-0.90] | <b>4.81E-07</b> | Pickrell 2016   |
| rs11071558   | 15  | 61,069,421  | Asthma                           | <i>RORA, NARG2, VPS13C</i>  | European/Multiancestry | rs11071558    | 1     | A        | G     | 12.97%      | 0.9967 | 0.86 [0.81-0.91] | <b>1.61E-06</b> | Demenaïs 2018   |
| rs11071559   | 15  | 61,069,988  | Asthma                           | <i>RORA</i>                 | European               | Affx-11799439 | 1     | C        | T     | 12.78%      | 1      | 0.85 [0.80-0.91] | <b>1.61E-06</b> | Moffatt 2010    |
| rs744910     | 15  | 67,446,785  | Asthma                           | <i>SMAD3</i>                | European               | Affx-11880511 | 1     | G        | A     | 51.41%      | 1      | 0.90 [0.86-0.94] | <b>2.05E-06</b> | Moffatt 2010    |
| rs56375023   | 15  | 67,448,363  | Asthma                           | <i>SMAD3</i>                | European               | rs56375023    | 1     | G        | A     | 23.57%      | 0.997  | 1.18 [1.12-1.24] | <b>1.32E-10</b> | Pickrell 2016   |
| rs2033784    | 15  | 67,449,660  | Asthma                           | <i>SMAD3, SMAD6</i>         | European/Multiancestry | Affx-11880551 | 1     | A        | G     | 29.79%      | 1      | 1.16 [1.11-1.21] | <b>6.43E-10</b> | Demenaïs 2018   |
| rs17294280   | 15  | 67,468,285  | Asthma + hay fever               | <i>SMAD3</i>                | European               | rs17294280    | 1     | A        | G     | 25.59%      | 0.903  | 1.15 [1.09-1.21] | <b>2.04E-07</b> | Ferreira 2014   |
| rs17806299   | 16  | 11,199,980  | Asthma                           | <i>CLEC16A, DEXI, SOCS1</i> | European/Multiancestry | rs17806299    | 1     | G        | A     | 19.92%      | 0.9988 | 0.85 [0.80-0.89] | <b>8.57E-10</b> | Demenaïs 2018   |
| rs62026376   | 16  | 11,228,712  | Asthma + hay fever               | <i>CLEC16A</i>              | European               | rs62026376    | 1     | C        | T     | 25.11%      | 0.997  | 0.82 [0.78-0.86] | <b>1.34E-14</b> | Ferreira 2014   |
| rs7203459    | 16  | 11,230,703  | Asthma                           | <i>CLEC16A</i>              | European               | rs7203459     | 1     | T        | C     | 24.56%      | 0.996  | 0.81 [0.78-0.86] | <b>7.83E-16</b> | Pickrell 2016   |
| rs2952156    | 17  | 37,876,835  | Asthma                           | <i>ERBB2, PGAP3, MIEN1</i>  | European/Multiancestry | rs2952156     | 1     | A        | G     | 69.08%      | 0.9973 | 0.90 [0.86-0.94] | <b>1.30E-05</b> | Demenaïs 2018   |
| rs11655198   | 17  | 38,026,169  | Asthma                           | <i>ZBP2</i>                 | European               | rs11655198    | 1     | C        | T     | 51.31%      | 1      | 0.90 [0.86-0.94] | <b>9.70E-07</b> | Pickrell 2016   |
| rs2305480    | 17  | 38,062,196  | Asthma                           | <i>GSDMB</i>                | European               | Affx-13850821 | 1     | G        | A     | 46.65%      | 1      | 0.91 [0.87-0.95] | <b>2.89E-05</b> | Moffatt 2010    |
| rs2305480    | 17  | 38,062,196  | Childhood asthma + exacerbations | <i>GSDMB</i>                | European               | Affx-13850821 | 1     | G        | A     | 46.65%      | 1      | 0.91 [0.87-0.95] | <b>2.89E-05</b> | Bonnelykke 2014 |
| rs11078927   | 17  | 38,064,405  | Asthma                           | <i>GSDMB</i>                | European               | rs11078927    | 1     | C        | T     | 46.63%      | 1      | 0.91 [0.87-0.95] | <b>2.99E-05</b> | Torgerson 2011  |
| rs7216389    | 17  | 38,069,949  | Childhood asthma                 | <i>ORMDL3</i>               | European               | Affx-13850945 | 1     | C        | T     | 48.44%      | 1      | 1.11 [1.07-1.16] | <b>1.58E-06</b> | Moffatt 2007    |

| Reported SNP | CHR | BP         | Phenotype              | Gene reported       | Ancestry               | #rsid         | R2 | noncoded | coded | coded freq. | INFO   | OR [95% CI]      | P                 | GWAS reported |
|--------------|-----|------------|------------------------|---------------------|------------------------|---------------|----|----------|-------|-------------|--------|------------------|-------------------|---------------|
| rs4794820    | 17  | 38,089,344 | Moderate-severe asthma | <i>ORMDL3/GSDMB</i> | European               | rs4794820     | 1  | A        | G     | 54.97%      | 0.984  | 1.08 [1.03-1.13] | <b>0.00052197</b> | Wan 2012      |
| rs3894194    | 17  | 38,121,993 | Asthma                 | <i>GSDMA</i>        | European               | Affx-13851698 | 1  | G        | A     | 45.10%      | 1      | 1.06 [1.02-1.11] | 0.00459175        | Moffatt 2010  |
| rs7212938    | 17  | 38,122,680 | Asthma + hay fever     | <i>GSDMA</i>        | European               | Affx-13851705 | 1  | G        | T     | 50.30%      | 1      | 0.95 [0.91-0.99] | 0.01268569        | Ferreira 2014 |
| rs17637472   | 17  | 47,461,433 | Asthma                 | <i>ZNF652, PHB</i>  | European/Multiancestry | rs17637472    | 1  | G        | A     | 39.79%      | 0.9556 | 1.14 [1.09-1.19] | <b>2.78E-08</b>   | Demenaïs 2018 |
| rs2284033    | 22  | 37,534,034 | Asthma                 | <i>IL2RB</i>        | European               | Affx-19547973 | 1  | G        | A     | 43.45%      | 1      | 0.95 [0.91-0.99] | 0.0141752         | Moffatt 2010  |

- Studies focused to reported GWAS for asthma with >500 cases and controls and SNPs meeting genome wide significance ( $P < 5 \times 10^{-8}$ )
- Sentinel SNP reported in each study was analysed.
- Gene reported are those commented on in the original manuscript.
- \*SNPs not evaluated (not determined)
- 80 SNPs tested overall (Bonferroni Correction  $P < 0.0006$ ), SNPs meeting criteria shown in bold (60 individual SNPs).
- Of 24 SNPs that did not meet correction, 10/24 showed nominal association ( $P < 0.05$ ).

Supplementary Table 4: Summary of stage 1 results for variants previously associated with allergic diseases in the Study of Ferreira et. al 2017. 87 signals with P<0.05 for moderate-severe asthma have their P value in bold; 40 signals had P<3.68×10<sup>-4</sup> for moderate-severe asthma (Bonferroni correction for 136 tests).

| Genecontext                          | rsid       | Position (b37) | Effect/<br>other allele | Allergic diseases (Ferreira et al. 2017) |                   |          | Moderate-severe asthma (this study) |                   |                 |
|--------------------------------------|------------|----------------|-------------------------|------------------------------------------|-------------------|----------|-------------------------------------|-------------------|-----------------|
|                                      |            |                |                         | Effect allele<br>frequency               | OR (95% CI)       | P-value  | Effect allele<br>frequency          | OR (95% CI)       | P               |
| <i>TNFRSF14</i> -[ ]- <i>FAM213B</i> | rs10910095 | 1:2510755      | G/A                     | 84%                                      | 1.04 (1.03, 1.06) | 2.70E-08 | 86%                                 | 1.04 (0.9, 1.11)  | 1.62E-01        |
| [ <i>RERE</i> ]                      | rs301806   | 1:8482078      | T/C                     | 54%                                      | 1.05 (1.04, 1.06) | 1.80E-20 | 58%                                 | 1.12 (1.07, 1.17) | <b>3.47E-07</b> |
| [ <i>RUNX3</i> ]                     | rs760805   | 1:25251923     | T/A                     | 58%                                      | 1.04 (1.03, 1.05) | 6.40E-13 | 57%                                 | 1.07 (1.03, 1.12) | <b>1.06E-03</b> |
| <i>SFPQ</i> -[ ]- <i>ZMYM4</i>       | rs76167968 | 1:35681738     | T/C                     | 93%                                      | 1.06 (1.04, 1.08) | 1.30E-08 | 92%                                 | 1.01 (0.92, 1.09) | 8.67E-01        |
| <i>C1orf54</i> -[ ]- <i>MRPS21</i>   | rs7512552  | 1:150265704    | C/T                     | 52%                                      | 1.03 (1.02, 1.04) | 1.40E-09 | 51%                                 | 1.04 (0.99, 1.08) | 1.14E-01        |
| [ <i>FLG</i> ]                       | rs61816761 | 1:152285861    | A/G                     | 1%                                       | 1.22 (1.17, 1.28) | 7.40E-21 | 2%                                  | 1.5 (1.28, 1.75)  | <b>3.04E-07</b> |
| <i>RPTN</i> -[ ]- <i>HRNR</i>        | rs12123821 | 1:152179152    | T/C                     | 5%                                       | 1.11 (1.08, 1.14) | 6.80E-17 | 5%                                  | 1.25 (1.13, 1.38) | <b>9.67E-06</b> |
| [ <i>RORC</i> ]                      | rs11204896 | 1:151796742    | C/G                     | 90%                                      | 1.06 (1.05, 1.08) | 2.40E-12 | 90%                                 | 1.02 (0.92, 1.09) | 6.43E-01        |
| [ <i>IL6R</i> ]                      | rs2228145  | 1:154426970    | C/A                     | 35%                                      | 1.04 (1.03, 1.05) | 4.30E-13 | 41%                                 | 1.04 (1, 1.09)    | 7.00E-02        |
| <i>NDUFS2</i> -[ ]- <i>FCER1G</i>    | rs2070901  | 1:161185058    | T/G                     | 26%                                      | 1.04 (1.03, 1.05) | 1.30E-11 | 27%                                 | 1.08 (1.03, 1.14) | <b>1.11E-03</b> |
| [ <i>CD247</i> ]                     | rs2988277  | 1:167431352    | C/T                     | 66%                                      | 1.04 (1.03, 1.05) | 4.00E-14 | 60%                                 | 1.14 (0.84, 1.19) | <b>1.08E-08</b> |
| <i>TNFSF18</i> --[ ]- <i>TNFSF4</i>  | rs4090390  | 1:173146921    | A/C                     | 22%                                      | 1.05 (1.04, 1.06) | 1.30E-15 | 24%                                 | 1.09 (1.04, 1.15) | <b>6.48E-04</b> |
| <i>FASLG</i> -[ ]-- <i>TNFSF18</i>   | rs1102705  | 1:172700868    | G/A                     | 11%                                      | 1.06 (1.04, 1.08) | 3.10E-10 | 11%                                 | 1.06 (0.87, 1.14) | 9.89E-02        |
| [ <i>ITPKB</i> ]                     | rs697852   | 1:226914734    | A/G                     | 85%                                      | 1.04 (1.03, 1.05) | 1.60E-09 | 82%                                 | 1.09 (1.03, 1.15) | <b>2.43E-03</b> |
| [ <i>LINC00299</i> ]                 | rs10174949 | 2:8442248      | G/A                     | 68%                                      | 1.07 (1.05, 1.08) | 7.30E-31 | 71%                                 | 1.11 (0.86, 1.16) | <b>1.55E-05</b> |
| [ <i>LOC339807</i> ]                 | rs4671601  | 2:64836267     | C/T                     | 83%                                      | 1.04 (1.03, 1.05) | 8.80E-09 | 80%                                 | 1.04 (0.91, 1.1)  | 1.56E-01        |
| [ <i>IL18R1</i> ]                    | rs10865050 | 2:102941311    | G/A                     | 85%                                      | 1.13 (1.11, 1.15) | 7.00E-61 | 86%                                 | 1.19 (0.79, 1.26) | <b>3.04E-08</b> |
| <i>IL1RL2</i> -[ ]- <i>IL18R1</i>    | rs12470864 | 2:102926362    | A/G                     | 35%                                      | 1.06 (1.05, 1.07) | 4.20E-26 | 39%                                 | 1.2 (1.15, 1.25)  | <b>5.06E-16</b> |
| <i>BCL2L11</i> --[ ]- <i>ANAPC1</i>  | rs4848612  | 2:112388538    | A/G                     | 76%                                      | 1.04 (1.03, 1.05) | 2.30E-10 | 77%                                 | 1.03 (0.98, 1.09) | 2.18E-01        |
| <i>BCL2L11</i> --[ ]- <i>ANAPC1</i>  | rs13403656 | 2:112269127    | A/T                     | 16%                                      | 1.05 (1.03, 1.06) | 2.20E-08 | 13%                                 | 1.04 (0.9, 1.11)  | 1.85E-01        |
| [ <i>IL1B</i> ]                      | rs1143633  | 2:113590467    | C/T                     | 70%                                      | 1.03 (1.02, 1.04) | 1.70E-10 | 64%                                 | 1.03 (0.93, 1.08) | 1.92E-01        |
| <i>KYNU</i> -[ ]- <i>ARHGAP15</i>    | rs74847330 | 2:143831599    | A/G                     | 88%                                      | 1.05 (1.03, 1.06) | 1.80E-09 | 87%                                 | 1.05 (0.9, 1.11)  | 1.59E-01        |
| [ <i>PLCL1</i> ]                     | rs1064213  | 2:198950240    | G/A                     | 47%                                      | 1.04 (1.03, 1.04) | 5.40E-12 | 52%                                 | 1.02 (0.94, 1.06) | 3.74E-01        |
| <i>CCL20</i> -[ ]- <i>DAWI</i>       | rs13384448 | 2:228707862    | T/C                     | 76%                                      | 1.04 (1.03, 1.05) | 2.80E-12 | 76%                                 | 1.08 (1.02, 1.13) | <b>3.61E-03</b> |
| [ <i>INPP5D</i> ]                    | rs1057258  | 2:234115629    | C/T                     | 80%                                      | 1.05 (1.03, 1.06) | 1.40E-10 | 82%                                 | 1.06 (0.89, 1.12) | <b>4.58E-02</b> |
| [ <i>D2HGDH</i> ]                    | rs34290285 | 2:242698640    | G/A                     | 73%                                      | 1.08 (1.07, 1.1)  | 4.00E-33 | 74%                                 | 1.21 (0.79, 1.27) | <b>5.79E-15</b> |
| [ <i>GLB1</i> ]                      | rs6776757  | 3:33069091     | G/A                     | 47%                                      | 1.03 (1.02, 1.04) | 3.10E-10 | 51%                                 | 1.08 (0.89, 1.12) | <b>9.13E-04</b> |
| <i>LINC00870</i> --[ ]- <i>RYBP</i>  | rs61192126 | 3:72394852     | T/C                     | 69%                                      | 1.04 (1.03, 1.05) | 8.90E-11 | 71%                                 | 1.02 (0.94, 1.06) | 5.36E-01        |
| <i>FAM172BP</i> -[ ]- <i>TRMT10C</i> | rs13088318 | 3:101242751    | A/G                     | 62%                                      | 1.03 (1.02, 1.04) | 8.60E-09 | 66%                                 | 1.05 (0.91, 1.1)  | <b>3.36E-02</b> |
| [ <i>SLC15A2</i> ]                   | rs75557865 | 3:121652141    | G/A                     | 57%                                      | 1.03 (1.02, 1.04) | 1.60E-08 | 52%                                 | 1.05 (0.92, 1.09) | <b>4.24E-02</b> |
| [ <i>RASA2</i> ]                     | rs10663129 | 3:141321836    | ACT/A                   | 33%                                      | 1.04 (1.03, 1.05) | 1.10E-13 | 33%                                 | 1.06 (1.01, 1.11) | <b>1.36E-02</b> |
| [ <i>LPP</i> ]                       | rs60946162 | 3:188133336    | T/C                     | 42%                                      | 1.04 (1.03, 1.05) | 8.60E-15 | 45%                                 | 1.05 (1.01, 1.1)  | <b>1.83E-02</b> |
| [ <i>LPP</i> ]                       | rs17607589 | 3:188402586    | C/T                     | 84%                                      | 1.05 (1.04, 1.07) | 1.80E-14 | 83%                                 | 1.07 (0.88, 1.14) | <b>1.57E-02</b> |
| <i>BCL6</i> --[ ]- <i>LPP-AS2</i>    | rs519973   | 3:187633268    | A/G                     | 35%                                      | 1.03 (1.02, 1.04) | 4.50E-10 | 34%                                 | 1.04 (1, 1.09)    | 8.13E-02        |
| <i>BCL6</i> --[ ]- <i>LPP-AS2</i>    | rs2030030  | 3:187793833    | T/C                     | 86%                                      | 1.04 (1.03, 1.05) | 1.00E-08 | 84%                                 | 1.08 (0.88, 1.14) | <b>1.46E-02</b> |

| Genecontext                           | rsid        | Position (b37) | Effect/<br>other allele | Allergic diseases (Ferreira et al. 2017) |                   |          | Moderate-severe asthma (this study) |                   |                 |
|---------------------------------------|-------------|----------------|-------------------------|------------------------------------------|-------------------|----------|-------------------------------------|-------------------|-----------------|
|                                       |             |                |                         | Effect allele<br>frequency               | OR (95% CI)       | P-value  | Effect allele<br>frequency          | OR (95% CI)       | P               |
| <i>FBXO45</i> -[ ]- <i>CEP19</i>      | rs80064395  | 3:196372546    | C/T                     | 94%                                      | 1.07 (1.05, 1.09) | 1.60E-12 | 91%                                 | 1.14 (0.81, 1.23) | <b>6.48E-04</b> |
| <i>STX18</i> --[ ]- <i>MSX1</i>       | rs10033073  | 4:4775401      | G/A                     | 35%                                      | 1.04 (1.03, 1.05) | 1.20E-10 | 37%                                 | 1.01 (0.96, 1.05) | 7.71E-01        |
| [ <i>TLR1</i> ]                       | rs5743618   | 4:38798648     | C/A                     | 70%                                      | 1.1 (1.09, 1.11)  | 3.30E-58 | 77%                                 | 1.08 (0.88, 1.13) | <b>4.01E-03</b> |
| [ <i>MANBA</i> ]                      | rs227275    | 4:103593898    | C/A                     | 56%                                      | 1.03 (1.02, 1.04) | 3.70E-11 | 53%                                 | 0.99 (0.95, 1.04) | 7.71E-01        |
| [ <i>ADAD1</i> ]                      | rs4145717   | 4:123316076    | T/G                     | 34%                                      | 1.06 (1.05, 1.07) | 9.20E-27 | 33%                                 | 1.05 (1, 1.1)     | <b>4.10E-02</b> |
| <i>IL2</i> -[ ]- <i>IL21</i>          | rs150254607 | 4:123454110    | ATAT/A                  | 7%                                       | 1.08 (1.06, 1.1)  | 4.60E-14 | 10%                                 | 1.15 (1.07, 1.24) | <b>1.62E-04</b> |
| [ <i>FAM105A</i> ]                    | rs16903574  | 5:14610309     | G/C                     | 8%                                       | 1.07 (1.05, 1.09) | 1.40E-12 | 49%                                 | 1.04 (0.99, 1.09) | 8.83E-02        |
| [ <i>IL7R</i> ]                       | rs7717955   | 5:35862841     | C/T                     | 71%                                      | 1.07 (1.06, 1.08) | 9.10E-36 | 72%                                 | 1.1 (0.87, 1.15)  | <b>8.58E-05</b> |
| <i>DAB2</i> ---[ ]-- <i>PTGER4</i>    | rs7714574   | 5:40492655     | T/C                     | 53%                                      | 1.03 (1.02, 1.04) | 5.90E-10 | 60%                                 | 1.04 (0.99, 1.08) | 9.74E-02        |
| <i>WDR36</i> -[ ]- <i>CAMK4</i>       | rs6594499   | 5:110470137    | C/A                     | 48%                                      | 1.08 (1.06, 1.09) | 4.60E-46 | 50%                                 | 1.18 (0.81, 1.23) | <b>1.33E-14</b> |
| <i>SLC25A46</i> -[ ]-- <i>TSLP</i>    | rs6869502   | 5:110166083    | T/A                     | 18%                                      | 1.08 (1.07, 1.09) | 6.40E-29 | 16%                                 | 1.12 (1.05, 1.18) | <b>2.42E-04</b> |
| <i>SLC25A46</i> --[ ]- <i>TSLP</i>    | rs1837253   | 5:110401872    | C/T                     | 78%                                      | 1.07 (1.06, 1.08) | 1.60E-31 | 74%                                 | 1.24 (1.18, 1.3)  | <b>2.81E-18</b> |
| <i>SLC25A46</i> -[ ]-- <i>TSLP</i>    | rs1814576   | 5:110159879    | C/T                     | 9%                                       | 1.12 (1.1, 1.15)  | 1.40E-22 | 4%                                  | 1.05 (0.93, 1.18) | 4.42E-01        |
| [ <i>TNFAIP8</i> ]                    | rs250308    | 5:118684297    | T/C                     | 37%                                      | 1.03 (1.02, 1.04) | 4.00E-09 | 39%                                 | 1.05 (0.91, 1.1)  | <b>3.36E-02</b> |
| [ <i>IL13</i> ]                       | rs848       | 5:131996500    | A/C                     | 24%                                      | 1.07 (1.05, 1.08) | 1.50E-24 | 18%                                 | 1.17 (0.81, 1.24) | <b>1.15E-08</b> |
| [ <i>C5orf56</i> ]                    | rs3749833   | 5:131799626    | C/T                     | 30%                                      | 1.04 (1.03, 1.05) | 3.30E-11 | 26%                                 | 1.18 (1.12, 1.23) | <b>5.43E-11</b> |
| <i>RAD50</i> -[ ]- <i>IL13</i>        | rs3091307   | 5:131989136    | G/A                     | 20%                                      | 1.06 (1.05, 1.07) | 3.60E-21 | 19%                                 | 1.15 (1.09, 1.21) | <b>7.85E-07</b> |
| [ <i>NDFIP1</i> ]                     | rs10068717  | 5:141494934    | T/C                     | 62%                                      | 1.04 (1.03, 1.05) | 4.80E-15 | 62%                                 | 1.08 (1.04, 1.13) | <b>3.36E-04</b> |
| [ <i>DIAPH1</i> ]                     | rs740474    | 5:140925362    | C/T                     | 42%                                      | 1.03 (1.02, 1.04) | 5.60E-11 | 39%                                 | 1.05 (0.91, 1.1)  | <b>2.34E-02</b> |
| <i>MIR3142</i> -[ ]- <i>MIR146A</i>   | rs2910162   | 5:159909345    | G/A                     | 68%                                      | 1.03 (1.02, 1.04) | 2.50E-09 | 57%                                 | 1.03 (0.98, 1.07) | 2.76E-01        |
| <i>LMAN2</i> -[ ]- <i>RGS14</i>       | rs13153019  | 5:176782218    | C/T                     | 26%                                      | 1.04 (1.02, 1.05) | 1.30E-08 | 25%                                 | 1.03 (0.98, 1.08) | 2.25E-01        |
| <i>HLA-DQA1</i> -[ ]- <i>HLA-DQB1</i> | rs34004019  | 6:32626403     | A/G                     | 70%                                      | 1.1 (1.09, 1.11)  | 3.80E-52 | 79%                                 | 1.21 (0.78, 1.27) | <b>6.28E-13</b> |
| [ <i>HLA-B</i> ]                      | rs2854001   | 6:31323012     | A/G                     | 18%                                      | 1.06 (1.05, 1.07) | 1.20E-19 | 23%                                 | 1.08 (1.02, 1.13) | <b>3.81E-03</b> |
| <i>HLA-B</i> -[ ]- <i>MICA</i>        | rs2507978   | 6:31351664     | G/A                     | 41%                                      | 1.04 (1.02, 1.05) | 1.20E-10 | 44%                                 | 0.98 (0.98, 1.03) | 4.11E-01        |
| [ <i>ITPR3</i> ]                      | rs10947428  | 6:33647058     | C/T                     | 19%                                      | 1.05 (1.03, 1.06) | 3.50E-13 | 21%                                 | 1.01 (0.96, 1.07) | 6.17E-01        |
| [ <i>HLA-J</i> ]                      | rs9259819   | 6:29893575     | G/T                     | 50%                                      | 1.04 (1.02, 1.05) | 2.40E-09 | 52%                                 | 0.97 (0.99, 1.01) | 1.71E-01        |
| <i>NCR3</i> -[ ]- <i>AIF1</i>         | rs28895016  | 6:31574525     | C/T                     | 91%                                      | 1.1 (1.07, 1.12)  | 9.40E-16 | 94%                                 | 1.07 (0.86, 1.17) | 1.24E-01        |
| [ <i>HLA-DPA1</i> ]                   | rs3097670   | 6:33046752     | G/C                     | 88%                                      | 1.06 (1.05, 1.08) | 7.70E-12 | 88%                                 | 1.02 (0.92, 1.09) | 5.92E-01        |
| [ <i>BACH2</i> ]                      | rs2134814   | 6:90987512     | C/G                     | 65%                                      | 1.05 (1.04, 1.06) | 1.70E-17 | 64%                                 | 1.13 (0.85, 1.18) | <b>6.82E-08</b> |
| [ <i>ATG5</i> ]                       | rs9372120   | 6:106667535    | G/T                     | 18%                                      | 1.04 (1.03, 1.05) | 4.20E-11 | 21%                                 | 1.07 (1.02, 1.13) | <b>7.24E-03</b> |
| [ <i>PTPRK</i> ]                      | rs35469349  | 6:128294709    | A/T                     | 26%                                      | 1.04 (1.03, 1.05) | 2.30E-10 | 31%                                 | 1.1 (1.05, 1.15)  | <b>1.30E-04</b> |
| [ <i>TNFAIP3</i> ]                    | rs5029937   | 6:138195151    | G/T                     | 97%                                      | 1.08 (1.05, 1.11) | 2.40E-08 | 97%                                 | 1.27 (0.7, 1.43)  | <b>5.32E-05</b> |
| [ <i>ARID1B</i> ]                     | rs9383820   | 6:157419508    | C/T                     | 76%                                      | 1.04 (1.02, 1.05) | 1.20E-08 | 79%                                 | 1.03 (0.92, 1.09) | 2.68E-01        |
| <i>RNASET2</i> -[ ]- <i>MIR3939</i>   | rs72033857  | 6:167390671    | C/CCTTT                 | 11%                                      | 1.06 (1.04, 1.08) | 1.20E-09 | 10%                                 | 1.03 (0.96, 1.11) | 3.59E-01        |
| <i>ITGB8</i> --[ ]- <i>ABCB5</i>      | rs6461503   | 7:20560996     | T/C                     | 53%                                      | 1.04 (1.03, 1.05) | 1.70E-14 | 48%                                 | 1.07 (0.9, 1.11)  | <b>3.68E-03</b> |
| [ <i>ITGB8</i> ]                      | rs10486391  | 7:20376018     | A/G                     | 53%                                      | 1.03 (1.02, 1.04) | 6.80E-09 | 59%                                 | 1.05 (0.91, 1.09) | <b>4.11E-02</b> |
| [ <i>JAZF1</i> ]                      | rs6977955   | 7:28156887     | T/C                     | 21%                                      | 1.05 (1.03, 1.06) | 7.10E-13 | 20%                                 | 1.06 (1, 1.11)    | <b>4.40E-02</b> |
| <i>C7orf72</i> -[ ]- <i>IKZF1</i>     | rs17664743  | 7:50253897     | A/G                     | 20%                                      | 1.04 (1.03, 1.05) | 6.20E-11 | 21%                                 | 1.02 (0.97, 1.08) | 4.00E-01        |
| [ <i>GSAP</i> ]                       | rs4296977   | 7:77018542     | C/T                     | 16%                                      | 1.06 (1.04, 1.07) | 2.10E-13 | 14%                                 | 1.07 (0.88, 1.14) | <b>2.87E-02</b> |

| Genecontext                   | rsid        | Position (b37) | Effect/<br>other allele | Allergic diseases (Ferreira et al. 2017) |                   |          | Moderate-severe asthma (this study) |                   |                 |
|-------------------------------|-------------|----------------|-------------------------|------------------------------------------|-------------------|----------|-------------------------------------|-------------------|-----------------|
|                               |             |                |                         | Effect allele<br>frequency               | OR (95% CI)       | P-value  | Effect allele<br>frequency          | OR (95% CI)       | P               |
| <i>MIR5708--[]--ZBTB10</i>    | rs7824394   | 8:81292599     | A/C                     | 37%                                      | 1.05 (1.04, 1.06) | 3.50E-20 | 36%                                 | 1.13 (0.85, 1.18) | <b>1.72E-07</b> |
| <i>[MYC]</i>                  | rs6990534   | 8:128814091    | A/G                     | 36%                                      | 1.04 (1.03, 1.05) | 6.40E-14 | 29%                                 | 1.07 (0.89, 1.12) | <b>6.30E-03</b> |
| <i>RANBP6--[]-IL33</i>        | rs144829310 | 9:6208030      | T/G                     | 16%                                      | 1.09 (1.08, 1.1)  | 1.20E-35 | 16%                                 | 1.23 (1.16, 1.3)  | <b>1.91E-12</b> |
| <i>RANBP6--[]-IL33</i>        | rs343478    | 9:6051399      | G/A                     | 52%                                      | 1.03 (1.02, 1.04) | 2.60E-10 | 55%                                 | 1.07 (0.9, 1.12)  | <b>3.48E-03</b> |
| <i>[JAK2]</i>                 | rs16922576  | 9:5064193      | C/T                     | 32%                                      | 1.04 (1.02, 1.05) | 3.20E-10 | 28%                                 | 1.06 (1.01, 1.11) | <b>1.51E-02</b> |
| <i>PHF19--[]-TRAF1</i>        | rs10760123  | 9:123650534    | T/G                     | 38%                                      | 1.03 (1.02, 1.04) | 5.20E-09 | 35%                                 | 1.01 (0.95, 1.05) | 7.41E-01        |
| <i>C9orf114--[]-LRRC8A</i>    | rs12551834  | 9:131613191    | G/A                     | 92%                                      | 1.06 (1.04, 1.08) | 3.00E-09 | 90%                                 | 1.08 (0.86, 1.16) | <b>3.14E-02</b> |
| <i>[IL2RA]</i>                | rs61839660  | 10:6094697     | T/C                     | 7%                                       | 1.08 (1.06, 1.1)  | 4.40E-19 | 10%                                 | 1.07 (1, 1.15)    | 5.39E-02        |
| <i>[IL2RA]</i>                | rs4747846   | 10:6074451     | C/G                     | 52%                                      | 1.04 (1.03, 1.05) | 1.00E-11 | 50%                                 | 1.09 (1.04, 1.14) | <b>1.30E-04</b> |
| <i>GATA3---[]---SFTA1P</i>    | rs12413578  | 10:9049253     | C/T                     | 90%                                      | 1.1 (1.08, 1.11)  | 1.30E-27 | 90%                                 | 1.27 (0.73, 1.36) | <b>1.20E-11</b> |
| <i>GATA3---[]---SFTA1P</i>    | rs1444789   | 10:9064361     | C/T                     | 20%                                      | 1.07 (1.05, 1.08) | 1.50E-22 | 21%                                 | 1.16 (1.1, 1.23)  | <b>1.81E-07</b> |
| <i>GATA3--[]SFTA1P</i>        | rs11255753  | 10:8605553     | T/G                     | 26%                                      | 1.04 (1.03, 1.05) | 2.00E-12 | 27%                                 | 1.09 (1.03, 1.14) | <b>7.94E-04</b> |
| <i>GATA3---[]---SFTA1P</i>    | rs72782676  | 10:9032555     | C/G                     | 98%                                      | 1.3 (1.21, 1.41)  | 3.20E-11 | 99%                                 | 1.73 (0.44, 2.28) | <b>7.95E-05</b> |
| <i>GATA3---[]---SFTA1P</i>    | rs2025758   | 10:8841669     | T/C                     | 58%                                      | 1.04 (1.03, 1.05) | 4.70E-15 | 54%                                 | 1.09 (0.88, 1.13) | <b>1.92E-04</b> |
| <i>GATA3---[]---SFTA1P</i>    | rs11255968  | 10:8936162     | C/T                     | 96%                                      | 1.09 (1.06, 1.12) | 7.70E-09 | 97%                                 | 1.25 (0.7, 1.43)  | <b>1.21E-03</b> |
| <i>[ZNF365]</i>               | rs2893907   | 10:64382359    | C/A                     | 58%                                      | 1.03 (1.02, 1.04) | 1.80E-09 | 56%                                 | 1.04 (0.99, 1.09) | 1.02E-01        |
| <i>C10orf95--[]-ACTRIA</i>    | rs10883723  | 10:104225832   | C/T                     | 31%                                      | 1.03 (1.02, 1.04) | 1.60E-08 | 35%                                 | 1.03 (0.98, 1.07) | 2.28E-01        |
| <i>AP5B1--[]-OVOL1</i>        | rs479844    | 11:65551957    | G/A                     | 57%                                      | 1.04 (1.03, 1.05) | 1.60E-13 | 56%                                 | 1.07 (1.02, 1.11) | <b>2.49E-03</b> |
| <i>WNT11--[]-LRRC32</i>       | rs7936323   | 11:76293758    | A/G                     | 46%                                      | 1.09 (1.08, 1.1)  | 2.20E-63 | 47%                                 | 1.14 (1.1, 1.19)  | <b>7.00E-10</b> |
| <i>WNT11--[]-LRRC32</i>       | rs55646091  | 11:76299431    | A/G                     | 5%                                       | 1.18 (1.15, 1.21) | 2.30E-40 | 5%                                  | 1.36 (1.23, 1.51) | <b>2.00E-09</b> |
| <i>WNT11--[]-LRRC32</i>       | rs11236814  | 11:76343428    | A/T                     | 91%                                      | 1.07 (1.05, 1.09) | 4.00E-14 | 90%                                 | 1.06 (0.88, 1.13) | 1.41E-01        |
| <i>SESN3--[]-FAM76B</i>       | rs59593577  | 11:95425526    | C/T                     | 87%                                      | 1.05 (1.04, 1.07) | 1.60E-11 | 87%                                 | 1.05 (0.89, 1.12) | 9.97E-02        |
| <i>LAYN--[]-SIK2</i>          | rs7130753   | 11:111470567   | C/T                     | 69%                                      | 1.05 (1.03, 1.06) | 7.00E-15 | 73%                                 | 1.07 (0.89, 1.13) | <b>4.64E-03</b> |
| <i>DDX6--[]-CXCR5</i>         | rs12365699  | 11:118743286   | G/A                     | 85%                                      | 1.06 (1.05, 1.08) | 5.10E-18 | 84%                                 | 1.05 (0.9, 1.12)  | 8.29E-02        |
| <i>KIRREL3-AS3---[]--ETS1</i> | rs56129466  | 11:128158189   | A/G                     | 79%                                      | 1.05 (1.03, 1.06) | 1.90E-13 | 78%                                 | 1.08 (0.88, 1.13) | <b>4.40E-03</b> |
| <i>[HDAC7]</i>                | rs55726902  | 12:48196982    | G/A                     | 80%                                      | 1.05 (1.04, 1.06) | 2.60E-16 | 76%                                 | 1.1 (0.87, 1.15)  | <b>2.16E-04</b> |
| <i>[AQP2]</i>                 | rs11169225  | 12:50345671    | A/T                     | 18%                                      | 1.05 (1.03, 1.06) | 1.20E-11 | 20%                                 | 1.09 (1.04, 1.15) | <b>8.44E-04</b> |
| <i>[STAT6]</i>                | rs1059513   | 12:57489709    | T/C                     | 89%                                      | 1.08 (1.07, 1.1)  | 1.00E-22 | 89%                                 | 1.18 (0.79, 1.26) | <b>2.80E-06</b> |
| <i>SUOX--[]-IKZF4</i>         | rs10876864  | 12:56401085    | G/A                     | 39%                                      | 1.05 (1.04, 1.06) | 1.40E-19 | 43%                                 | 1.13 (0.85, 1.18) | <b>2.18E-08</b> |
| <i>[ATXN2]</i>                | rs7137828   | 12:111932800   | T/C                     | 54%                                      | 1.03 (1.02, 1.04) | 2.20E-10 | 51%                                 | 1.01 (0.97, 1.05) | 7.42E-01        |
| <i>SPPL3--[]-HNF1A-AS1</i>    | rs6489785   | 12:121363724   | T/C                     | 37%                                      | 1.04 (1.03, 1.05) | 1.60E-15 | 40%                                 | 1.06 (0.9, 1.11)  | <b>9.06E-03</b> |
| <i>C12orf65--[]-CDK2AP1</i>   | rs63406760  | 12:123742692   | T/TG                    | 77%                                      | 1.05 (1.03, 1.06) | 3.00E-13 | 79%                                 | 1.03 (0.98, 1.09) | 2.63E-01        |
| <i>[FOXO1]</i>                | rs4943794   | 13:41173408    | C/G                     | 23%                                      | 1.04 (1.03, 1.06) | 7.20E-12 | 21%                                 | 1.06 (1.01, 1.12) | <b>2.30E-02</b> |
| <i>PIBF1--[]-KLF5</i>         | rs9573092   | 13:73627275    | A/G                     | 70%                                      | 1.03 (1.02, 1.04) | 2.70E-08 | 65%                                 | 1.03 (0.93, 1.08) | 1.55E-01        |
| <i>[PSMA6]</i>                | rs1048990   | 14:35761675    | G/C                     | 16%                                      | 1.04 (1.03, 1.05) | 1.00E-08 | 16%                                 | 1.07 (1.01, 1.13) | <b>3.10E-02</b> |
| <i>FOXA1--[]--TTC6</i>        | rs111914382 | 14:38097001    | TG/T                    | 27%                                      | 1.04 (1.02, 1.05) | 8.10E-09 | 24%                                 | 1.01 (0.96, 1.06) | 6.50E-01        |
| <i>[RAD51B]</i>               | rs2104047   | 14:68754417    | T/C                     | 36%                                      | 1.04 (1.03, 1.05) | 1.60E-13 | 28%                                 | 1.06 (0.9, 1.11)  | <b>1.38E-02</b> |
| <i>JDP2--[]-BATF</i>          | rs9323612   | 14:75968608    | A/G                     | 70%                                      | 1.03 (1.02, 1.04) | 8.60E-09 | 67%                                 | 1.03 (0.93, 1.08) | 1.73E-01        |
| <i>RCOR1--[]-TRAF3</i>        | rs9989163   | 14:103235012   | A/G                     | 49%                                      | 1.03 (1.02, 1.04) | 1.90E-08 | 47%                                 | 1 (0.96, 1.05)    | 9.21E-01        |

| Genecontext                | rsid        | Position (b37) | Effect/<br>other allele | Allergic diseases (Ferreira et al. 2017) |                   |          | Moderate-severe asthma (this study) |                   |                 |
|----------------------------|-------------|----------------|-------------------------|------------------------------------------|-------------------|----------|-------------------------------------|-------------------|-----------------|
|                            |             |                |                         | Effect allele<br>frequency               | OR (95% CI)       | P-value  | Effect allele<br>frequency          | OR (95% CI)       | P               |
| <i>RTF1-[]-ITPKA</i>       | rs12440045  | 15:41782684    | C/A                     | 55%                                      | 1.03 (1.02, 1.04) | 4.90E-10 | 53%                                 | 1.07 (1.02, 1.11) | <b>4.36E-03</b> |
| <i>[RORA]</i>              | rs10519067  | 15:61068347    | G/A                     | 86%                                      | 1.06 (1.04, 1.07) | 9.30E-13 | 87%                                 | 1.18 (0.8, 1.26)  | <b>3.91E-07</b> |
| <i>[SMAD3]</i>             | rs56375023  | 15:67448363    | A/G                     | 21%                                      | 1.07 (1.06, 1.09) | 8.20E-32 | 24%                                 | 1.18 (1.12, 1.24) | <b>7.18E-11</b> |
| <i>[IQGAP1]</i>            | rs3540      | 15:91045408    | G/A                     | 65%                                      | 1.04 (1.03, 1.05) | 3.30E-11 | 68%                                 | 1.01 (0.95, 1.06) | 6.37E-01        |
| <i>CLEC16A-[]-RMI2</i>     | rs11644510  | 16:11277358    | C/T                     | 64%                                      | 1.07 (1.06, 1.08) | 6.10E-38 | 63%                                 | 1.17 (0.82, 1.22) | <b>1.61E-11</b> |
| <i>RMI2-[]-LITAF</i>       | rs12596613  | 16:11491007    | C/G                     | 67%                                      | 1.03 (1.02, 1.04) | 6.10E-09 | 66%                                 | 0.98 (0.97, 1.03) | 4.05E-01        |
| <i>SMTNL2-[]-ALOX15</i>    | rs71368508  | 17:4521473     | C/A                     | 99%                                      | 1.12 (1.08, 1.17) | 2.00E-09 | 98%                                 | 1.24 (0.7, 1.43)  | <b>4.58E-03</b> |
| <i>[GSDMB]</i>             | rs921650    | 17:38069076    | A/G                     | 48%                                      | 1.06 (1.05, 1.07) | 5.70E-30 | 48%                                 | 1.11 (1.06, 1.15) | <b>3.91E-06</b> |
| <i>CCR7-[]-SMARCE1</i>     | rs112401631 | 17:38764524    | A/T                     | 1%                                       | 1.26 (1.21, 1.31) | 2.20E-26 | 2%                                  | 1.26 (1.08, 1.46) | <b>3.29E-03</b> |
| <i>CCR7-[]-SMARCE1</i>     | rs11464691  | 17:38770641    | TA/T                    | 57%                                      | 1.05 (1.04, 1.06) | 1.40E-21 | 63%                                 | 1.06 (1.02, 1.11) | <b>5.81E-03</b> |
| <i>[PSMD3]</i>             | rs11652139  | 17:38149033    | A/G                     | 59%                                      | 1.05 (1.04, 1.06) | 7.50E-22 | 60%                                 | 1.06 (1.02, 1.11) | <b>8.86E-03</b> |
| <i>[STAT5B]</i>            | rs7207591   | 17:40414862    | A/G                     | 76%                                      | 1.04 (1.03, 1.05) | 1.40E-09 | 73%                                 | 1.06 (0.89, 1.12) | <b>1.21E-02</b> |
| <i>MAP3K14-[]-ARHGAP27</i> | rs7214661   | 17:43430696    | G/A                     | 32%                                      | 1.03 (1.02, 1.04) | 1.20E-08 | 34%                                 | 1.03 (0.99, 1.08) | 1.93E-01        |
| <i>[ZNF652]</i>            | rs9889262   | 17:47398070    | A/T                     | 35%                                      | 1.04 (1.03, 1.05) | 9.70E-16 | 36%                                 | 1.13 (1.09, 1.19) | <b>2.07E-08</b> |
| <i>DYNAP-[]-RAB27B</i>     | rs4801001   | 18:52336175    | T/C                     | 42%                                      | 1.03 (1.02, 1.04) | 5.90E-09 | 41%                                 | 1.02 (0.94, 1.07) | 3.40E-01        |
| <i>[TNFRSF11A]</i>         | rs4574025   | 18:60009814    | T/C                     | 56%                                      | 1.03 (1.02, 1.04) | 6.80E-09 | 53%                                 | 1.01 (0.96, 1.05) | 8.08E-01        |
| <i>SLC7A10-[]-CEBPA</i>    | rs10414065  | 19:33721455    | C/T                     | 92%                                      | 1.1 (1.08, 1.12)  | 6.10E-18 | 94%                                 | 1.19 (0.77, 1.3)  | <b>1.94E-04</b> |
| <i>[NFATC2]</i>            | rs3787184   | 20:50157837    | A/G                     | 78%                                      | 1.05 (1.04, 1.06) | 1.10E-12 | 83%                                 | 1.02 (0.93, 1.08) | 5.15E-01        |
| <i>[ZNF217]</i>            | rs2766678   | 20:52208356    | G/A                     | 21%                                      | 1.06 (1.04, 1.07) | 5.00E-18 | 21%                                 | 1.08 (0.88, 1.14) | <b>3.89E-03</b> |
| <i>[RTEL1]</i>             | rs6011033   | 20:62322699    | G/A                     | 78%                                      | 1.05 (1.03, 1.06) | 3.50E-14 | 76%                                 | 1.09 (1.03, 1.14) | <b>1.14E-03</b> |
| <i>[RUNX1]</i>             | rs73205303  | 21:36467830    | A/G                     | 13%                                      | 1.04 (1.03, 1.06) | 7.90E-10 | 15%                                 | 1.15 (1.08, 1.22) | <b>8.30E-06</b> |
| <i>[SIK1]</i>              | rs76081789* | 21:44846426    | T/C                     | 94%                                      | 1.07 (1.04, 1.09) | 1.30E-08 | -                                   | -                 | -               |
| <i>TEF-[]-TOB2</i>         | rs758343    | 22:41816652    | A/T                     | 22%                                      | 1.05 (1.04, 1.06) | 4.80E-14 | 20%                                 | 1.08 (0.88, 1.14) | <b>4.59E-03</b> |

\*rs76081789 was not available in our asthma study nor a suitable proxy.

Supplementary Table 5: Summary of stage 1 results for variants previously associated with allergic diseases in the Study of Zhu et. al 2018  
 35 signals with P<0.05 for moderate-severe asthma have their P value in bold; 28 signals had P<1.32×10<sup>-3</sup> for moderate-severe asthma (Bonferroni correction for 38 tests).

| Nearest gene        | rsid       | Position (b37) | Effect/ other allele | Asthma, Allergy and meta-analysis (Zhu et al. 2018) |           |         |          | Moderate-severe asthma (this study) |                   |                 |
|---------------------|------------|----------------|----------------------|-----------------------------------------------------|-----------|---------|----------|-------------------------------------|-------------------|-----------------|
|                     |            |                |                      | Asthma P                                            | Allergy P | Meta OR | Meta P   | Effect allele frequency             | OR (95% CI)       | P               |
| <i>HLA-DQB1</i>     | rs9273374  | 6:32626614     | A/G                  | 1.31E-35                                            | 1.17E-4   | 0.84    | 7.87E-35 | 39%                                 | 0.81 (0.77, 0.84) | <b>7.13E-22</b> |
| <i>C11orf30</i>     | rs7936070  | 11:76293527    | T/G                  | 2.17E-21                                            | 4.40E-22  | 1.08    | 2.81E-28 | 47%                                 | 1.14 (1.1, 1.19)  | <b>8.33E-10</b> |
| <i>IL1RL1</i>       | rs72823641 | 2:102936159    | A/T                  | 7.43E-18                                            | 4.27E-24  | 0.89    | 1.58E-27 | 14%                                 | 0.84 (0.79, 0.9)  | <b>5.25E-08</b> |
| <i>SMAD3</i>        | rs56062135 | 15:67455630    | T/C                  | 2.62E-23                                            | 6.23E-13  | 1.16    | 1.56E-22 | 24%                                 | 1.18 (1.12, 1.24) | <b>8.31E-11</b> |
| <i>IL33</i>         | rs9775039  | 9:6177453      | A/G                  | 7.41E-23                                            | 4.84E-8   | 1.18    | 4.42E-22 | 16%                                 | 1.22 (1.15, 1.29) | <b>7.38E-12</b> |
| <i>CLEC16A</i>      | rs36045143 | 16:11224966    | G/A                  | 9.05E-17                                            | 8.94E-17  | 0.93    | 1.83E-21 | 25%                                 | 0.82 (0.78, 0.86) | <b>3.84E-15</b> |
| <i>TSLP</i>         | rs1837253  | 5:110401872    | T/C                  | 1.81E-20                                            | 1.07E-13  | 0.93    | 4.38E-21 | 26%                                 | 0.81 (0.77, 0.85) | <b>2.81E-18</b> |
| <i>SLC25A46</i>     | rs7705653  | 5:110142816    | G/A                  | 4.58E-10                                            | 1.88E-20  | 1.14    | 1.12E-19 | 15%                                 | 1.13 (1.06, 1.2)  | <b>1.03E-04</b> |
| <i>TLR10</i>        | rs28393318 | 4:38784267     | G/A                  | 2.61E-10                                            | 6.67E-20  | 0.92    | 2.14E-19 | 20%                                 | 0.92 (0.88, 0.97) | <b>2.83E-03</b> |
| <i>GSDMB</i>        | rs869402   | 17:38068043    | C/T                  | 7.02E-18                                            | 6.70E-4   | 1.12    | 4.15E-17 | 48%                                 | 1.11 (1.07, 1.16) | <b>1.10E-06</b> |
| <i>D2HGDH</i>       | rs34290285 | 2:242698640    | A/G                  | 3.89E-11                                            | 1.54E-15  | 0.93    | 5.17E-17 | 26%                                 | 0.82 (0.79, 0.87) | <b>5.79E-15</b> |
| <i>LINC00299</i>    | rs10174949 | 2:8442248      | A/G                  | 6.08E-10                                            | 5.72E-16  | 0.94    | 1.70E-16 | 29%                                 | 0.9 (0.86, 0.95)  | <b>1.55E-05</b> |
| <i>SMARCE1</i>      | rs9911533  | 17:38775476    | C/T                  | 2.08E-07                                            | 1.65E-16  | 0.92    | 9.70E-16 | 37%                                 | 0.94 (0.9, 0.99)  | <b>8.54E-03</b> |
| <i>LOC101928272</i> | rs12413578 | 10:9049253     | T/C                  | 3.27E-14                                            | 4.63E-10  | 0.91    | 1.09E-14 | 10%                                 | 0.79 (0.73, 0.84) | <b>1.20E-11</b> |
| <i>IL7R</i>         | rs6881270  | 5:35879095     | T/C                  | 7.87E-6                                             | 2.61E-15  | 0.91    | 1.53E-14 | 28%                                 | 0.91 (0.87, 0.95) | <b>6.33E-05</b> |
| <i>SUOX</i>         | rs10876864 | 12:56401085    | G/A                  | 1.43E-12                                            | 8.49E-10  | 1.05    | 1.41E-13 | 43%                                 | 1.13 (1.08, 1.18) | <b>2.18E-08</b> |
| <i>STAT6</i>        | rs1059513  | 12:57489709    | C/T                  | 1.18E-11                                            | 1.62E-09  | 0.92    | 7.65E-13 | 11%                                 | 0.85 (0.79, 0.91) | <b>2.80E-06</b> |
| <i>IL2</i>          | rs56267605 | 4:123363109    | C/A                  | 3.29E-10                                            | 6.59E-10  | 1.05    | 2.56E-12 | 33%                                 | 1.05 (1, 1.1)     | <b>3.82E-02</b> |
| <i>FLG-AS1</i>      | rs61816766 | 1:152319572    | C/T                  | 3.10E-8                                             | 3.07E-11  | 1.14    | 4.63E-12 | 4%                                  | 1.33 (1.18, 1.5)  | <b>3.85E-06</b> |
| <i>IL2RA</i>        | rs61839660 | 10:6094697     | T/C                  | 6.86E-4                                             | 3.98E-12  | 1.12    | 2.30E-11 | 10%                                 | 1.07 (1, 1.15)    | 5.39E-02        |
| <i>RAD50</i>        | rs2706362  | 5:131925187    | C/T                  | 1.27E-11                                            | 1.73E-7   | 1.06    | 3.75E-11 | 19%                                 | 1.13 (1.07, 1.19) | <b>8.43E-06</b> |
| <i>CD247</i>        | rs1214598  | 1:167426424    | A/G                  | 6.66E-8                                             | 4.54E-10  | 0.95    | 5.14E-11 | 38%                                 | 0.88 (0.85, 0.92) | <b>3.05E-08</b> |
| <i>LAYN</i>         | rs659529   | 11:111436896   | T/A                  | 3.45E-7                                             | 1.20E-10  | 0.95    | 6.03E-11 | 29%                                 | 0.92 (0.88, 0.97) | <b>8.29E-04</b> |
| <i>LOC101927770</i> | rs2766664  | 20:52171241    | A/G                  | 1.72E-3                                             | 1.41E-11  | 1.08    | 8.07E-11 | 24%                                 | 1.03 (0.98, 1.09) | 1.98E-01        |
| <i>TPD52L3</i>      | rs2169282  | 9:6350235      | A/G                  | 3.13E-11                                            | 1.30E-5   | 1.09    | 1.80E-10 | 40%                                 | 1.12 (1.07, 1.17) | <b>4.06E-07</b> |
| <i>KIF3A</i>        | rs10074523 | 5:132060583    | C/A                  | 4.15E-11                                            | 1.13E-5   | 1.1     | 2.37E-10 | 25%                                 | 1.1 (1.04, 1.15)  | <b>2.69E-04</b> |

| Nearest gene     | rsid       | Position (b37) | Effect/ other allele | Asthma, Allergy and meta-analysis (Zhu et al. 2018) |           |         |          | Moderate-severe asthma (this study) |                   |                 |
|------------------|------------|----------------|----------------------|-----------------------------------------------------|-----------|---------|----------|-------------------------------------|-------------------|-----------------|
|                  |            |                |                      | Asthma P                                            | Allergy P | Meta OR | Meta P   | Effect allele frequency             | OR (95% CI)       | P               |
| <i>SLC7A10</i>   | rs10414065 | 19:33721455    | T/C                  | 6.78E-9                                             | 2.74E-8   | 0.91    | 2.63E-10 | 6%                                  | 0.84 (0.77, 0.92) | <b>1.94E-04</b> |
| <i>ABCB5</i>     | rs6461503  | 7:20560996     | T/C                  | 2.13E-9                                             | 8.16E-8   | 1.05    | 3.19E-10 | 48%                                 | 1.07 (1.02, 1.11) | <b>3.68E-03</b> |
| <i>RTEL1</i>     | rs3208007  | 20:62322288    | T/C                  | 9.27E-9                                             | 2.81E-8   | 0.95    | 3.22E-10 | 24%                                 | 0.92 (0.88, 0.97) | <b>2.08E-03</b> |
| <i>LINC00708</i> | rs10795656 | 10:8595839     | A/G                  | 2.10E-6                                             | 3.19E-10  | 1.05    | 4.07E-10 | 27%                                 | 1.07 (1.02, 1.13) | <b>3.84E-03</b> |
| <i>C5orf56</i>   | rs2548992  | 5:131808668    | A/G                  | 7.96E-11                                            | 5.40E-4   | 1.1     | 4.54E-10 | 26%                                 | 1.17 (1.11, 1.23) | <b>2.10E-10</b> |
| <i>ZBTB10</i>    | rs2136016  | 8:81300681     | G/A                  | 3.72E-10                                            | 3.57E-4   | 1.09    | 2.11E-9  | 39%                                 | 1.13 (1.08, 1.18) | <b>6.01E-08</b> |
| <i>IVL</i>       | rs61815704 | 1:152893891    | G/C                  | 4.08E-7                                             | 5.51E-8   | 1.14    | 5.16E-9  | 2%                                  | 1.3 (1.13, 1.5)   | <b>2.38E-04</b> |
| <i>RERE</i>      | rs301805   | 1:8481016      | T/G                  | 6.01E-8                                             | 3.36E-7   | 0.96    | 6.43E-9  | 42%                                 | 0.89 (0.86, 0.93) | <b>3.58E-07</b> |
| <i>RUNX3</i>     | rs742230   | 1:25251424     | G/A                  | 5.95E-6                                             | 1.27E-8   | 0.96    | 1.02E-8  | 43%                                 | 0.93 (0.89, 0.97) | <b>1.06E-03</b> |
| <i>RAD51B</i>    | rs8008961  | 14:68752643    | T/C                  | 2.14E-7                                             | 3.01E-7   | 1.05    | 1.24E-8  | 28%                                 | 1.06 (1.01, 1.11) | <b>1.83E-02</b> |
| <i>NRROS</i>     | rs4916533  | 3:196373582    | T/C                  | 2.79E-7                                             | 3.62E-7   | 0.93    | 1.66E-8  | 8%                                  | 0.88 (0.81, 0.95) | <b>1.12E-03</b> |
| <i>EVI5</i>      | rs12743520 | 1:93037112     | A/C                  | 3.02E-3                                             | 6.87E-9   | 0.93    | 3.83E-8  | 26%                                 | 0.96 (0.91, 1)    | 7.06E-02        |



Supplementary Table 6: Summary of results for 3 novel signals for moderate-severe asthma in the 23&Me asthma GWAS

| Chr | Position    | Variant     | Locus           | Non-coded | coded | Minor allele | MAF    | Meta-analyses    |          |            | 23&Me proxy r2 | Alleles (A/B) | OR [95% CI]      | P        |
|-----|-------------|-------------|-----------------|-----------|-------|--------------|--------|------------------|----------|------------|----------------|---------------|------------------|----------|
|     |             |             |                 |           |       |              |        | OR [95% CI]      | P        | rsid       |                |               |                  |          |
| 4   | 123,055,701 | rs560026225 | <i>KIAA1109</i> | G         | GATT  | GATT         | 23.60% | 1.12 [1.08-1.16] | 3.06E-09 | rs72687036 | 0.66           | A/G           | 1.06 [1.04-1.08] | 3.96E-07 |
| 10  | 8,115,362   | rs10905284  | <i>GATA3</i>    | C         | A     | C            | 42.94% | 0.90 [0.88-0.93] | 1.76E-10 | rs10905284 | 1.00           | A/C           | 1.04 [1.02-1.06] | 2.72E-05 |
| 11  | 1,136,478   | rs11603634  | <i>MUC5AC</i>   | A         | G     | A            | 49.64% | 1.09 [1.06-1.12] | 2.32E-08 | rs11603634 | 1.00           | A/G           | 1.00 [0.97-1.02] | 8.09E-01 |

The corresponding effect size (OR) defined as per copy of the B allele.

Supplementary Table 7: GRASP and GWAS catalog look up for variants in LD ( $r^2 > 0.4$ ) with 3 novel signals for moderate-severe asthma

| Gene            | Sentinel    | Reported genes                    | Reported SNP | Band.   | $r^2$ | phenotype                                                        | p-value  | N       | First author/<br>Journal         | PMID     | Year |
|-----------------|-------------|-----------------------------------|--------------|---------|-------|------------------------------------------------------------------|----------|---------|----------------------------------|----------|------|
| <i>KIAA1109</i> | rs560026225 | <i>KIAA1109</i>                   | rs45515895   | 4q27    | 0.562 | Mean platelet volume                                             | 8.00E-10 | 164,454 | Astle WJ, <i>Cell</i>            | 27863252 | 2017 |
| <i>KIAA1109</i> | rs560026225 | <i>IL2, ADAD1, KIAA1109, IL21</i> | rs17454584   | 4q27    | 0.573 | Allergic sensitization                                           | 6.00E-10 | 31,879  | Bonnelykke K, <i>Nat. Genet.</i> | 23817571 | 2014 |
| <i>GATA3</i>    | rs10905284  | <i>FLJ45983</i>                   | rs7897792    | 10p14   | 0.808 | Rheumatoid arthritis                                             | 1.90E-10 | 58,284  | Okada Y, <i>Nature</i>           | 24390342 | 2014 |
| <i>GATA3</i>    | rs10905284  | <i>GATA3</i>                      | rs10905284   | 10p14   | 1.000 | Eosinophil counts                                                | 7.00E-09 | 172,275 | Astle WJ, <i>Cell</i>            | 27863252 | 2017 |
| <i>MUC5AC</i>   | rs11603634  | -                                 | rs4077759    | 11p15.5 | 0.416 | Fibrotic idiopathic interstitial pneumonias (pulmonary fibrosis) | 8.47E-13 | 50,410  | Fingerlin TE, <i>Nat. Genet.</i> | 23583980 | 2013 |

Supplementary Table 8: Results of eQTL analyses for variants meeting genome wide significance ( $P < 5 \times 10^{-8}$ ) with susceptibility to moderate-severe asthma.

| Chr | Position    | Variant     | Locus           | Sentinel SNP                     | Proxy      | No. SNPs | R2       | eQTL P     | Probeset id                                                                                          | Gene                   | Effect allele | Direction | Tissue      | Dataset                         |
|-----|-------------|-------------|-----------------|----------------------------------|------------|----------|----------|------------|------------------------------------------------------------------------------------------------------|------------------------|---------------|-----------|-------------|---------------------------------|
| 1   | 167,427,247 | rs7523907   | <i>CD247</i>    | rs7523907                        | n/a        | 1        | 1        | 8.00E-15   | 6290400                                                                                              | <i>CD247</i>           | C             | +         | Blood       | Westra-cis-eQTL                 |
| 2   | 102,949,161 | rs12479210  | <i>IL1RL1</i>   | rs12479210                       | n/a        | 168      | 1        | 6.20E-10   | 100136977_TGI_at                                                                                     | <i>IL18R1</i>          | C             | +         | Lung, Blood | UBio-cis-eQTL (2), UBC-cis-eQTL |
|     |             |             |                 |                                  | n/a        | 843      | 1        | 8.70E-35   | 100148210_TGI_at,<br>100302151_TGI_at,<br>100148162_TGI_at,<br>100302783_TGI_at,<br>100312840_TGI_at | <i>IL1RL1</i>          | C             | +         | Lung        | UBC-cis-eQTL                    |
|     |             |             |                 |                                  | rs6543114  | 1        | 0.681875 | 1.82E-05   | 100129736_TGI_at                                                                                     | <i>SLC9A2</i>          | A             | +         | Lung        | UBC-cis-eQTL                    |
| 2   | 242,698,640 | rs34290285  | <i>D2HGDH</i>   | rs34290285                       | n/a        | 31       | 1        | 0.000001   | 100154978_TGI_at                                                                                     | <i>D2HGDH</i>          | G             | +         | Lung        | UBC-cis-eQTL                    |
|     |             |             |                 |                                  | n/a        | 26       | 1        | 2.64E-08   | 100135940_TGI_at                                                                                     | <i>ING5</i>            | G             | +         | Lung        | UBC-cis-eQTL                    |
| 4   | 123,055,701 | rs560026225 | <i>KIAA1109</i> | 4:123055701:G:GATT (rs560026225) | rs17454584 | 3        | 0.573326 | 1.51E-05   | 100144991_TGI_at                                                                                     | <i>KIAA1109</i>        | A             | +         | Lung        | UBC-cis-eQTL                    |
| 5   | 110,467,499 | rs1438673   | <i>WDR36</i>    | rs1438673                        | rs2289277  | 2        | 0.745315 | 1.73E-05   | 100142361_TGI_at                                                                                     | <i>TSLP</i>            | C             | +         | Lung        | UBC-cis-eQTL                    |
| 5   | 131,799,626 | rs3749833   | <i>C5orf56</i>  | rs3749833                        | rs2548992  | 72       | 0.970592 | 0.00000494 | 100132153_TGI_at                                                                                     | <i>RAD50</i>           | G             | -         | Lung        | UBC-cis-eQTL                    |
|     |             |             |                 |                                  | n/a        | 41       | 1        | 2.84E-10   | 100123073_TGI_at                                                                                     | <i>SLC22A5</i>         | T             | -         | Lung        | UBC-cis-eQTL                    |
|     |             |             |                 |                                  | n/a        | 37       | 1        | 1.91E-08   | 100150988_TGI_at                                                                                     | <i>U46120</i>          | T             | -         | Lung        | UBio-cis-eQTL                   |
| 5   | 131,887,986 | rs1986009   | <i>RAD50</i>    | rs1986009                        | rs12652920 | 5        | 0.984912 | 0.0000139  | 100158314_TGI_at                                                                                     | <i>BC043424</i>        | G             | +         | Lung        | UBC-cis-eQTL                    |
|     |             |             |                 |                                  | n/a        | 72       | 1        | 0.00000597 | 100132153_TGI_at                                                                                     | <i>RAD50</i>           | C             | -         | Lung        | UBC-cis-eQTL                    |
|     |             |             |                 |                                  | rs12652920 | 29       | 0.984912 | 1.75E-13   | 100158314_TGI_at                                                                                     | <i>SLC22A5</i>         | G             | +         | Lung, Blood | Westra-cis-eQTL, UBC-cis-eQTL   |
| 6   | 32,581,739  | rs776111176 | <i>HLA-DQA1</i> | chr6:32581739 (rs776111176)      | rs2395175  | 2        | 0.501612 | 8.89E-11   | 100304000_TGI_at                                                                                     | <i>PSORS1C3</i>        | G             | -         | Lung        | UBC-trans-eQTL                  |
|     |             |             |                 |                                  | rs2760982  | 1        | 0.448833 | 1.24E-12   | 100134503_TGI_at                                                                                     | <i>ENST00000342748</i> | G             | -         | Lung        | UBC-trans-eQTL                  |
| 6   | 32,627,250  | rs9273410   | <i>HLA-DQB1</i> | rs9273410                        | rs9274607  | 10       | 0.838508 | 9.83E-19   | 100126665_TGI_at,<br>100135327_TGI_at                                                                | <i>AGPAT1</i>          | G             | -         | Lung        | UBC-cis-eQTL                    |
|     |             |             |                 |                                  | rs9271383  | 2        | 0.638051 | 3.41E-06   | 100139818_TGI_at                                                                                     | <i>BAT2</i>            | C             | +         | Lung        | UBC-cis-eQTL                    |
|     |             |             |                 |                                  | rs9274607  | 28       | 0.838508 | 7.10E-11   | 100158347_TGI_at                                                                                     | <i>C19orf6</i>         | C             | -         | Lung        | UBC-trans-eQTL                  |
|     |             |             |                 |                                  | rs9271383  | 140      | 0.638051 | 5.63E-07   | 100161395_TGI_at,<br>100129037_TGI_at                                                                | <i>TAP2</i>            | C             | +         | Lung        | UBC-cis-eQTL                    |
|     |             |             |                 |                                  | rs3129758  | 32       | 0.584267 | 7.43E-11   | 100303039_TGI_at                                                                                     | <i>CDSN</i>            | G             | -         | Lung        | UBC-trans-eQTL                  |

|    |            |            |                 |            |            |      |          |             |                                                     |                                             |   |   |                                                               |                                |
|----|------------|------------|-----------------|------------|------------|------|----------|-------------|-----------------------------------------------------|---------------------------------------------|---|---|---------------------------------------------------------------|--------------------------------|
|    |            |            |                 |            | rs9273527  | 2    | 0.618033 | 1.72E-10    | 100161253_TGI_at                                    | <i>BTN3A2</i>                               | T | + | Lung                                                          | UBC-trans-eQTL                 |
|    |            |            |                 |            | rs9273527  | 4    | 0.618033 | 6.72E-11    | 100303994_TGI_at                                    | <i>ZFP57</i>                                | T | - | Lung                                                          | UBC-trans-eQTL                 |
|    |            |            |                 |            | rs72844114 | 2    | 0.457473 | 3.67E-11    | 100306864_TGI_at                                    | <i>ZNF764</i>                               | G | + | Lung                                                          | UBC-trans-eQTL                 |
|    |            |            |                 |            | rs72853984 | 3    | 0.459233 | 1.45E-10    | 100134503_TGI_at                                    | <i>ENST00000342748</i>                      | T | + | Lung                                                          | UBC-trans-eQTL                 |
|    |            |            |                 |            | rs9273481  | 4    | 0.620469 | 1.51E-10    | 100129349_TGI_at                                    | <i>HLA-A</i>                                | G | + | Lung                                                          | UBC-trans-eQTL                 |
|    |            |            |                 |            | rs9274607  | 6    | 0.838508 | 8.36E-80    | 100313766_TGI_at                                    | <i>HLA-DQA2</i>                             | C | + | Lung                                                          | UBC-cis-eQTL                   |
|    |            |            |                 |            | n/a        | 1058 | 1        | 9.36E-14    | 209480_at,<br>100311704_TGI_at,<br>100300398_TGI_at | <i>HLA-DQB1</i>                             | A | - | Nasal Brush,<br>Bronchial Brush,<br>Blood,<br>Lung,<br>Sputum | UBio-cis-eQTL,<br>UBC-cis-eQTL |
|    |            |            |                 |            | rs9274607  | 112  | 0.838508 | 0.00000372  | 100311684_TGI_at                                    | <i>HLA-DQB2</i>                             | C | - | Lung                                                          | UBC-cis-eQTL                   |
|    |            |            |                 |            | rs9274607  | 234  | 0.838508 | 1.35E-19    | 100125275_TGI_at                                    | <i>HLA-DRB1</i>                             | C | - | Lung                                                          | UBC-cis-eQTL                   |
|    |            |            |                 |            | rs9273241  | 134  | 0.831772 | 4.05E-24    | 100139572_TGI_at                                    | <i>HLA-DRB3</i>                             | C | + | Lung                                                          | UBC-trans-eQTL                 |
|    |            |            |                 |            | rs9274607  | 135  | 0.838508 | 2.29E-73    | 100127159_TGI_at                                    | <i>HLA-DRB4</i>                             | C | + | Lung                                                          | UBC-trans-eQTL                 |
|    |            |            |                 |            | rs9274607  | 154  | 0.838508 | 7.74E-21    | 100302940_TGI_at                                    | <i>HLA-DRB5</i>                             | C | - | Lung                                                          | UBC-cis-eQTL                   |
|    |            |            |                 |            | rs9274607  | 138  | 0.838508 | 5.50E-40    | 100160430_TGI_at                                    | <i>HLA-DRB6</i>                             | C | + | Lung                                                          | UBC-cis-eQTL                   |
| 11 | 1,136,478  | rs11603634 | <i>MUC5AC</i>   | rs11603634 | rs11602802 | 4    | 0.460739 | 2.50E-05    | 214303_x_at                                         | <i>MUC5AC</i>                               | A | + | Bronchial brush                                               | UBio-cis-eQTL                  |
| 11 | 76,293,726 | rs7936312  | <i>C11orf30</i> | rs7936312  | n/a        | 15   | 1        | 4.48E-13    | 100143158_TGI_at                                    | <i>C11orf30</i>                             | G | + | Lung                                                          | UBC-cis-eQTL                   |
| 12 | 56,449,875 | rs7305461  | <i>RPS26</i>    | rs7305461  | rs1081975  | 55   | 0.917454 | 2.61E-242   | 100146882_TGI_at                                    | <i>40S ribosomal protein S26 pseudogene</i> | C | - | Lung                                                          | UBC-trans-eQTL                 |
|    |            |            |                 |            | rs705700   | 43   | 0.894132 | 0.0000166   | 100146593_TGI_at                                    | <i>CDK2</i>                                 | T | - | Lung                                                          | UBC-cis-eQTL                   |
|    |            |            |                 |            | rs2271194  | 1    | 0.930264 | 0.000119964 | 1510564                                             | <i>CNPY2</i>                                | A | - | Blood                                                         | Westra-cis-eQTL                |
|    |            |            |                 |            | rs1131017  | 55   | 0.981593 | 3.68E-43    | 100156286_TGI_at                                    | <i>ENST00000299756</i>                      | G | - | Lung                                                          | UBC-trans-eQTL                 |
|    |            |            |                 |            | rs1131017  | 55   | 0.981593 | 1.50E-240   | 100131680_TGI_at                                    | <i>ENST00000356247</i>                      | G | - | Lung                                                          | UBC-trans-eQTL                 |
|    |            |            |                 |            | rs1131017  | 7    | 0.981593 | 0.00000201  | 100144439_TGI_at                                    | <i>FAM62A</i>                               | A | - | Lung                                                          | UBio-cis-eQTL,<br>UBC-cis-eQTL |
|    |            |            |                 |            | rs1131017  | 8    | 0.981593 | 2.27E-10    | 100129882_TGI_at                                    | <i>hCT32692</i>                             | G | - | Lung                                                          | UBC-trans-eQTL                 |
|    |            |            |                 |            | n/a        | 1    | 1        | 0.001296289 | 1090433                                             | <i>RNF41</i>                                | A | + | Blood                                                         | Westra-cis-eQTL                |
|    |            |            |                 |            | rs1131017  | 55   | 0.981593 | 6.98E-190   | 100312533_TGI_at                                    | <i>similar to 40S ribosomal protein S26</i> | G | - | Lung                                                          | UBC-cis-eQTL                   |

|            |            |             |                |                  |              |     |          |             |                                                                                 |                 |   |   |             |                                  |
|------------|------------|-------------|----------------|------------------|--------------|-----|----------|-------------|---------------------------------------------------------------------------------|-----------------|---|---|-------------|----------------------------------|
| 12         | 57,497,005 | rs703816    | <i>STAT6</i>   | rs703816         | n/a          | 91  | 1        | 5.12E-36    | 100310285_TGI_at,<br>100156721_TGI_at,<br>100305452_TGI_at                      | <i>STAT6</i>    | T | - | Lung, Blood | Westra-cis-eQTL,<br>UBC-cis-eQTL |
| 15         | 67,441,750 | rs72743461  | <i>SMAD3</i>   | rs72743461       | rs17228058   | 1   | 0.995669 | 4.68E-06    | 6840328                                                                         | <i>SMAD3</i>    | G | - | Blood       | Westra-cis-eQTL                  |
| 16         | 11,230,703 | rs7203459   | <i>CLEC16A</i> | rs7203459        | n/a          | 14  | 1        | 6.10E-09    | 100143389_TGI_at                                                                | <i>AK124470</i> | T | + | Lung        | UBC-cis-eQTL                     |
|            |            |             |                |                  | rs34540843   | 1   | 0.968229 | 0.000390341 | 231221_at                                                                       | <i>CLEC16A</i>  | G | + | Blood       | UBio-cis-eQTL                    |
|            |            |             |                |                  | rs2241099    | 5   | 0.963908 | 2.60E-40    | 1990300                                                                         | <i>DEXI</i>     | G | - | Blood       | Westra-cis-eQTL                  |
| 17         | 37,910,368 | rs2941522   | <i>IKZF3</i>   | rs2941522        | n/a          | 536 | 1        | 3.28E-11    | 100307813_TGI_at,<br>100152237_TGI_at,<br>100305614_TGI_at,<br>100307813_TGI_at | <i>CRKRS</i>    | T | - | Lung        | UBC-cis-eQTL                     |
|            |            |             |                |                  | n/a          | 211 | 1        | 2.43E-18    | 100138145_TGI_at                                                                | <i>GSDMA</i>    | T | - | Lung        | UBC-cis-eQTL                     |
|            |            |             |                |                  | n/a          | 211 | 1        | 1.00E-14    | 100144966_TGI_at,<br>219233_s_at                                                | <i>GSDMB</i>    | T | + | Lung, Blood | Westra-cis-eQTL, UBC-cis-eQTL    |
|            |            |             |                |                  | rs907091     | 88  | 0.97553  | 0.0000122   | 100127152_TGI_at                                                                | <i>ORMDL3</i>   | C | - | Lung        | UBC-cis-eQTL                     |
|            |            |             |                |                  | rs903506     | 64  | 0.471    | 4.48E-10    | 100145295_TGI_at                                                                | <i>PERLD1</i>   | G | + | Lung        | UBC-cis-eQTL                     |
|            |            |             |                |                  | rs2952140    | 4   | 0.963009 | 0.000015    | 100134069_TGI_at                                                                | <i>PLXDC1</i>   | C | - | Lung        | UBC-cis-eQTL                     |
|            |            |             |                |                  | rs876493     | 1   | 0.3443   | 3.43E-07    | 100125568_TGI_at                                                                | <i>PNMT</i>     | G | + | Lung        | UBC-cis-eQTL                     |
| rs36095411 | 5          | 0.865581    | 1.49E-10       | 100126839_TGI_at | <i>ZPBP2</i> | T   | -        | Lung        | UBC-trans-eQTL                                                                  |                 |   |   |             |                                  |
| 17         | 47,439,302 | rs112502960 | <i>ZNF652</i>  | rs112502960      | rs4794029    | 7   | 0.480575 | 1.72E-08    | 100124455_TGI_at                                                                | <i>GNGT2</i>    | C | - | Lung        | UBC-cis-eQTL                     |

- UBC-cis-eQTL – University of British Columbia Lung eQTL dataset<sup>10</sup> (10% FDR)
- Westra – Blood cell dataset<sup>9</sup> (10% FDR)
- UBio – U-BIOPRED datasets from blood cells, sputum, lung biopsy, bronchial brushing and nasal brushing<sup>12,13</sup> (5% FDR).
- No. SNPs – number of SNPs identified in LD ( $r^2 < 0.4$ ) with sentinel SNP and showing association at designated FDR.
- P value reported corresponds to lowest p-value for any SNP/probe combination and R2 is the linkage disequilibrium between this reported SNP and the sentinel SNP from the case-control association results.

Supplementary Table 9: ENCODE analyses of rs11603634 (shown in red) and proxies ( $r^2 > 0.4$ ) highlighting potential regulatory mechanisms underlying eQTL for *MUC5AC*

| SNP        | LD (R <sup>2</sup> ) | Promoter histone marks | Enhancer histone marks                                        | DNase                                     | Proteins bound                           | Motifs changed                                          |
|------------|----------------------|------------------------|---------------------------------------------------------------|-------------------------------------------|------------------------------------------|---------------------------------------------------------|
| rs11602802 | 0.46                 | -                      | ESDR, LNG, MUS, KID, GI, BRN, BONE                            | LNG,BRST,SKIN,MUS,BRN,LNG                 | -                                        | NF-Y                                                    |
| rs11600289 | 0.45                 | -                      | LNG, ADRL, GI                                                 | -                                         | -                                        | HDAC2,PRDM1                                             |
| rs12791023 | 0.45                 | -                      | IPSC, GI                                                      | -                                         | -                                        | LBP-1,LBP-9                                             |
| rs11603634 | 1                    | -                      | GI                                                            | GI,MUS,SKIN                               | -                                        | Fox,Foxa,Foxc1,Foxd3,Foxj1,Foxk1,HDAC2,PPAR,Zfp105,p300 |
| rs10902099 | 1                    | -                      | -                                                             | -                                         | -                                        | Evi1,Foxo,Foxp1,GATA,HDAC2,HNF1,Hoxa10,TATA,Zfp105      |
| rs10902102 | 0.44                 | -                      | -                                                             | -                                         | -                                        | HMG-IY,Hoxa9,Mef2,Nkx6-1,Pou2f2,Zfp105                  |
| rs11245979 | 0.45                 | -                      | -                                                             | -                                         | -                                        | CTCF,NF-kappaB                                          |
| rs28490880 | 0.4                  | LNG, CRVX              | ESC, ESDR, LNG, FAT, STRM, BLD, MUS, SKIN, GI, LIV, BRN, BONE | ESDR,BLD,BLD,BLD,BLD,GI,LANG,BLD,CRVX,BRN | ERALPHA_A,NFKB,PU1,AP2GAMMA,FOSL2,ZBTB7A | Ets,GR,Hic1,NF-kappaB,Roaz,SREBP,Znf143                 |

Data from HaploReg v4.1 (<http://archive.broadinstitute.org/mammals/haploreg/haploreg.php>)

Supplementary Table 10: ENCODE analyses of rs560026225 (proxy rs72687036 shown in red) and proxies ( $r^2 > 0.4$ ) highlighting potential regulatory mechanisms underlying eQTL for *KIA1109*.

| SNP               | LD (R <sup>2</sup> ) | Promoter histone marks | Enhancer histone marks | DNase               | Proteins bound | Motifs changed                                                            |
|-------------------|----------------------|------------------------|------------------------|---------------------|----------------|---------------------------------------------------------------------------|
| rs17518038        | 0.42                 | -                      | -                      | -                   | -              | Pou2f2,STAT                                                               |
| rs3108402         | <b>0.41</b>          | -                      | -                      | -                   | -              | HDAC2                                                                     |
| rs3108401         | 0.42                 | -                      | GI                     | -                   | -              | Bcl6b,Ehf,Elf3,Irf,STAT,Tel2                                              |
| rs1949945         | 0.41                 | -                      | -                      | -                   | -              | -                                                                         |
| rs941130          | 0.41                 | -                      | ESDR, LNG              | -                   | -              | -                                                                         |
| rs10021288        | 0.69                 | -                      | -                      | -                   | -              | -                                                                         |
| rs4279237         | 0.74                 | -                      | LNG                    | -                   | -              | -                                                                         |
| rs3115230         | 0.45                 | -                      | -                      | -                   | -              | <b>Foxo,Mef2</b>                                                          |
| rs76080510        | 0.59                 |                        | FAT, LNG, SKIN         | -                   | -              | Bcl6b,CEBPG,Gfi1,Hoxc9,Lhx3,Ncx,Nkx6-1,OTX,Pax-6,Pou3f4,STAT              |
| rs77130822        | 0.58                 |                        | FAT, LNG, SKIN         | BRN,BRN,LNG,GI,SKIN | -              | Ets,Pax-5,Pax-6,STAT                                                      |
| rs6534338         | 0.48                 | -                      | -                      | -                   | -              | INSM1,Maf,Pou2f2,Pou5f1,YY1,ZBTB7A                                        |
| rs114785709       | 0.72                 | BLD                    | ESC, BLD               | -                   | -              | AP-2,LF-A1,PU.1,Rad21,SP1,SREBP,Zbtb12                                    |
| rs56035021        | 0.55                 | -                      | -                      | -                   | -              | Foxd1,NRSF                                                                |
| rs112481526       | 0.68                 | -                      | BLD                    | -                   | -              | EBF,Pax-5                                                                 |
| rs62323898        | 0.54                 | -                      | BLD                    | -                   | -              | -                                                                         |
| rs10857090        | 0.51                 | -                      | -                      | -                   | -              | -                                                                         |
| rs139735807       | 0.94                 | -                      | -                      | -                   | -              | Arid5b,ERalpha-a,GCNF,HDAC2,HEY1,MZF1::1-4,NR4A,Nkx2,Pou1f1,RORalpha1,SF1 |
| rs72687029        | 0.95                 | -                      | -                      | -                   | -              | Arid3a,Mef2,Myb,TATA                                                      |
| rs55969942        | 0.56                 | -                      | VAS                    | -                   | -              | Hsf,Pou2f2                                                                |
| rs55904957        | 0.56                 | -                      | VAS                    | -                   | CFOS           | AFP1,AIRE,Pax-4                                                           |
| rs7671357         | 0.56                 | -                      | -                      | -                   | -              | -                                                                         |
| rs4505848         | 0.55                 |                        | FAT                    | -                   | -              | Mef2,Myc                                                                  |
| rs5861560         | 0.57                 | BLD                    | BLD                    | -                   | -              | Barx1,DMRT2,DMRT4,Foxa,HNF1,PLZF,Pou2f2,TATA                              |
| rs45605540        | 0.73                 | -                      | -                      | -                   | -              | CCNT2,GATA,Hand1,LF-A1,TAL1                                               |
| rs7664452         | 0.58                 | -                      | -                      | -                   | -              | E4BP4,Foxk1,Foxo,Foxp3,HDAC2,STAT                                         |
| <b>rs72687036</b> | <b>1</b>             | -                      | <b>STRM, HRT</b>       | -                   | -              | -                                                                         |
| rs143502740       | 0.96                 | -                      | -                      | -                   | -              | Cdx2,Hoxa10,Hoxd10,Nanog,Pou1f1,p300                                      |

|             |      |                  |                                 |                |               |                                                                                                                                                                                                   |
|-------------|------|------------------|---------------------------------|----------------|---------------|---------------------------------------------------------------------------------------------------------------------------------------------------------------------------------------------------|
| rs202035542 | 0.44 | -                | -                               | -              | -             | Nanog,Pou1f1                                                                                                                                                                                      |
| rs6827756   | 0.49 | -                | BLD                             | -              | -             | Arid3a,Mef2,Pou2f2,p300                                                                                                                                                                           |
| rs45515895  | 0.99 | -                | BLD                             | -              | -             | -                                                                                                                                                                                                 |
| rs72687044  | 0.57 | LNG              | -                               | -              | -             | HES1,TATA                                                                                                                                                                                         |
| rs13147049  | 0.57 | -                | -                               | -              | -             | Nkx6-1,Pdx1,Pou3f4,Sp100                                                                                                                                                                          |
| rs6534347   | 0.49 | -                | -                               | -              | -             | AIRE,ERalpha-a                                                                                                                                                                                    |
| rs28854492  | 0.55 | -                | -                               | MUS            | -             | EBF,MZF1::1-4,Sin3Ak-20                                                                                                                                                                           |
| rs144914346 | 0.95 | -                | -                               | -              | -             | Arid5b,Rad21,Smad                                                                                                                                                                                 |
| rs34834002  | 0.54 | -                | -                               | -              | -             | Barx1,Bsx,Dlx2,Egr-1,Ets,GATA,Hoxa5,LUN-1,NERF1a,STAT                                                                                                                                             |
| rs7693745   | 0.7  | -                | -                               | -              | -             | CTCF, GATA, HNF4                                                                                                                                                                                  |
| rs200269026 | 0.47 | -                | -                               | FAT, STRM, BLD | -             | -                                                                                                                                                                                                 |
| rs7699742   | 0.53 | -                | -                               | -              | -             | CEBPG,GATA,HEY1,Myc,Smad3,TATA,p53                                                                                                                                                                |
| rs11722421  | 0.54 | -                | -                               | -              | -             | -                                                                                                                                                                                                 |
| rs45528737  | 0.44 | -                | -                               | -              | -             | E2F                                                                                                                                                                                               |
| rs1127348   | 0.9  | -                | -                               | -              | -             | Brachyury,Zbtb12                                                                                                                                                                                  |
| rs201757131 | 0.5  | -                | -                               | -              | -             | Barhl1,Barx2,CDP,Dbx1,Dbx2,En-1,Esx1,Foxd1,Foxp1,HMG-IY,HNF1,Hlx1,Hmx,Hoxa10,Hoxa3,Hoxa7,Hoxb4,Hoxc6,LUN-1,Lhx3,Mef2,Msx-1,Nkx2,OTX,Pax-4,Pax-6,Pax7,Phox2a,Pou2f2,Pou3f2,Prrx1,Prrx2,Vax2,Zfp105 |
| rs33976078  | 0.54 | -                | -                               | -              | -             | Dbx1,Foxd1,Foxp1,Foxq1,HMG-IY,Hoxa10,Mef2,OTX,Pax-4,Zfp105                                                                                                                                        |
| rs11727369  | 0.47 | ESC, IPSC, PLCNT | ESC, ESDR, IPSC, BLD, SKIN, LIV | -              | YY1,MAFF,MAFK | DBP,Znf143                                                                                                                                                                                        |
| rs56313700  | 0.9  | -                | -                               | -              | -             | PPAR,THAP1                                                                                                                                                                                        |
| rs151275015 | 0.43 | -                | -                               | -              | -             | NF-kappaB,PLZF                                                                                                                                                                                    |
| rs1383046   | 0.88 | -                | -                               | -              | -             | -                                                                                                                                                                                                 |
| rs4145717   | 0.53 | -                | -                               | -              | -             | Hoxa9,Pbx-1                                                                                                                                                                                       |
| rs17388568  | 0.66 | -                | -                               | -              | -             | CDP,Cdc5,Pou2f2,RFX5                                                                                                                                                                              |
| rs12499753  | 0.52 | -                | -                               | -              | -             | -                                                                                                                                                                                                 |
| rs1904522   | 0.51 | -                | -                               | -              | -             | DMRT5,PLZF                                                                                                                                                                                        |
| rs55896948  | 0.51 | -                | -                               | -              | -             | -                                                                                                                                                                                                 |
| rs716501    | 0.51 | -                | -                               | -              | -             | GR                                                                                                                                                                                                |
| rs17454584  | 0.86 | -                | -                               | -              | -             | Mrg1::Hoxa9,Pou2f2,Pou5f1                                                                                                                                                                         |



|            |      |         |               |   |          |                                                                                                                                                                                                |
|------------|------|---------|---------------|---|----------|------------------------------------------------------------------------------------------------------------------------------------------------------------------------------------------------|
| rs35914000 | 0.64 | -       | BLD           | - | -        | Irf                                                                                                                                                                                            |
| rs56360035 | 0.51 | -       | -             | - | -        | HDAC2,LXR,PRDM1,Pax-4,SP1,UF1H3BETA                                                                                                                                                            |
| rs56267605 | 0.51 |         |               |   |          | ELF1,Ets,Irf,Nkx3,PU.1,Pax-8                                                                                                                                                                   |
| rs3136534  | 0.51 |         |               |   |          | DMRT2,Pou2f2,TCF4                                                                                                                                                                              |
| rs2069772  | 0.63 | BLD     |               |   |          | Arid3a,Barx2,Dbx2,En-1,Evi-1,Gbx1,Gbx2,HNF1,Hlxb9,Hoxa4,Hoxa7,Hoxb4,Hoxb7,Hoxc6,Hoxd8,Msx-1,Msx2,Ncx,Nkx6-1,Nkx6-2,Nobox,Pax-6,Pax7,Phox2a,Pou2f2,Pou3f2,Pou3f3,Pou3f4,Pou4f3,Pou6f1,Prrx1,Sox |
| rs2069763  | 0.51 | BLD, GI | BLD           |   | THYM     | Hand1,Msx-1                                                                                                                                                                                    |
| rs58939053 | 0.49 |         |               |   |          |                                                                                                                                                                                                |
| rs45599938 | 0.5  |         |               |   |          | CTCF,Pax-5,Rad21                                                                                                                                                                               |
| rs11098659 | 0.51 |         |               |   |          | Bbx,En-1,Foxp1,Gfi1b,Hdx,Msx-1,YY1                                                                                                                                                             |
| rs45454992 | 0.62 |         |               |   |          | NF-1,TLX1::NFIC                                                                                                                                                                                |
| rs45610037 | 0.84 |         | FAT, LNG, BLD |   | BLD,SKIN | AP-1,CEBPB,Sox,Zec                                                                                                                                                                             |

Data from HaploReg v4.1 (<http://archive.broadinstitute.org/mammals/haploreg/haploreg.php>)

Supplementary Table 11: ENCODE analyses of rs10905284 (*GATA3*, shown in red) and proxies ( $r^2 < 0.4$ ) highlighting potential mechanisms

| SNP         | LD (R <sup>2</sup> ) | Promoter histone marks                                                          | Enhancer histone marks                                                        | DNase                                                                                                                                                     | Proteins bound                                 | Motifs changed                                                                 |
|-------------|----------------------|---------------------------------------------------------------------------------|-------------------------------------------------------------------------------|-----------------------------------------------------------------------------------------------------------------------------------------------------------|------------------------------------------------|--------------------------------------------------------------------------------|
| rs2275806   | 0.41                 | ESC, ESDR, IPSC, FAT, BRST, BLD, MUS, BRN, SKIN, LIV, PLCNT, GI, HRT, CRVX, VAS | ESC, ESDR, IPSC, FAT, BLD, BRN, SKIN, GI, LNG, MUS, THYM, HRT, PANC, SPLN     | ESC,ESDR,ESDR,ESDR,ESDR,ESC,IPSC,IPSC, BRST,BLD,BLD,BLD,BLD,BLD,SKIN,ADRL,BRN,HRT,KID,LNG,MUS,MUS,PLCNT,GI, THYM,MUS,GI,LNG,BLD,LIV,BRST,MUS,VAS,BLD,SKIN | CTCF,RAD21,SMC3,Y Y1,ZNF143,POL2,CTC FL,HAE2F1 | GR,ZBRK1                                                                       |
| rs3781094   | 0.55                 | BRST, BLD, SKIN, FAT, ADRL, KID, VAS                                            | ESC, ESDR, IPSC, BLD, MUS, BRN, SKIN, LNG, HRT, SPLN                          | ESC,ESDR,ESDR,ESDR,ESDR,ESC,IPSC,IPSC, BRST,BLD,BLD,BLD,BLD,SKIN,ADRL,BRN,LNG,GI,THYM,BRST,VAS,BLD                                                        |                                                | Hbp1,Pou2f2,TCF12                                                              |
| rs3802604   | 0.58                 | ESC, ESDR, FAT, BRST, BLD, MUS, SKIN, ADRL, KID, LNG, GI, THYM, VAS, BRN        | ESC, ESDR, IPSC, FAT, BLD, BRN, SKIN, LNG, MUS, GI                            | ESC,ESDR,ESDR,ESDR,ESDR,ESC,LNG,IPSC, BRST,BLD,BLD,BLD,BLD,SKIN,SKIN,SKIN,ADRL,BRN,KID,LNG,MUS,PLCNT,GI,THYM,GI,BLD,BRST,MUS,MUS,VAS,BRN,SKIN, LNG        | BATF,EBF1,POL2,SIX 5,NFKB,P300,RAD21, ZNF263   | BDP1,ERalpha-a,EWSR1-FLI1,GR,NRSF,PU.1, Rad21,SMC3,Spz1,TATA,WT1,ZNF263,Znf143 |
| rs477771    | 0.48                 | ESDR, BLD, KID, GI, THYM, BRST, VAS, SKIN                                       | ESC, ESDR, IPSC, BRST, BLD, FAT, GI, ADRL, MUS, BRN                           | ESDR,ESC,IPSC,BRST,BLD,BLD,SKIN,THYM, BLD                                                                                                                 | EBF1,NFKB                                      | PLAG1,TATA,p300                                                                |
| rs444762    | 0.5                  | ESDR, BLD, KID, GI, THYM, BRST, VAS, SKIN                                       | ESC, ESDR, IPSC, BRST, BLD, FAT, ADRL, MUS, SPLN, BRN                         | ESC,ESDR,ESDR,ESDR,ESC,IPSC,BRST,BLD, BLD,BLD,SKIN,PLCNT,THYM,BLD,BRST,VAS,SKIN                                                                           | POL2                                           |                                                                                |
| rs376397    | 0.5                  | BLD, KID, GI, THYM, BRST, VAS                                                   | ESC, ESDR, IPSC, BRST, BLD, FAT, ADRL, MUS, SPLN, BRN                         | ESC,ESDR,ESDR,ESDR,IPSC,BRST,BLD,BLD, BLD,SKIN,ADRL,PLCNT,THYM,BLD,BRST,VAS,SKIN                                                                          | POL2                                           | GATA                                                                           |
| rs409560    | 0.49                 | BLD, ADRL, KID, GI, BRST, VAS                                                   | ESC, ESDR, IPSC, BRST, BLD, FAT, SPLN, BRN                                    | SDR,ESDR,ESDR,ESDR,ESC,IPSC,BLD,BLD,SKIN,PLCNT,THYM,BLD,VAS,SKIN                                                                                          |                                                | HEY1,Mrg,Nkx2,TATA                                                             |
| rs374641    | 0.63                 | BLD, BRST                                                                       | ESC, ESDR, IPSC, BRST, BLD, FAT, LNG, PLCNT, SPLN, BRN                        | ESDR,BRST,BLD,BLD,PLCNT,VAS,SKIN,LNG                                                                                                                      | EGR1,HAE2F1,POL2                               | CTCF,NRSF,Pbx3,SMC3                                                            |
| rs386680    | 0.64                 | BLD, BRST                                                                       | ESC, ESDR, IPSC, BRST, BLD, SKIN, FAT, THYM, SPLN, BRN                        | BRST,BLD,BLD,PLCNT,VAS,BLD,SKIN,LNG                                                                                                                       | EGR1,HAE2F1,POL2                               | BCL,CTCF,NRSF,Sin3Ak-20                                                        |
| rs371668    | 0.64                 | BLD, BRST                                                                       | ESC, ESDR, IPSC, BRST, BLD, FAT, ADRL, PLCNT, SPLN, VAS, BRN                  | ESDR,ESDR,BRST,BLD,BLD,BLD,BLD,PLCNT,THYM,VAS,BLD,BRN,SKIN,LNG                                                                                            | EGR1,HAE2F1,POL2                               | EBF,HEY1,LBP-1,LBP-9,NRSF,Pbx3,Rad21,p300                                      |
| rs3824660   | 0.64                 | ESDR, BRST, KID, VAS                                                            | ESC, ESDR, IPSC, BRST, BLD, SKIN, FAT, THYM, SPLN, BRN                        | PLCNT                                                                                                                                                     |                                                | BCL,BDP1,NF-kappaB,YY1                                                         |
| rs2277228   | 0.7                  | ESC, ESDR, KID, PLCNT                                                           | ESDR, IPSC, ESC, BRST, BLD, MUS, SKIN, FAT, ADRL, PLCNT, THYM, HRT, LNG, SPLN | ESC,ESDR,ESDR,ESDR,ESC,IPSC,IPSC,PLCNT,THYM,VAS,SKIN                                                                                                      |                                                | CDP,PLAG1                                                                      |
| rs201042786 | 0.7                  | ESC, KID                                                                        | ESC, ESDR, IPSC, BRST, BLD, SKIN, FAT, ADRL, PLCNT, THYM, MUS                 |                                                                                                                                                           | GATA2                                          | EWSR1-FLI1,Evi-1,Irf                                                           |
| rs570730    | 0.61                 | ESC, KID                                                                        | ESC, ESDR, IPSC, BRST, BLD, SKIN, FAT, LIV, BRN, ADRL, PLCNT, MUS, VAS        | ESC,BLD,MUS,VAS,SKIN                                                                                                                                      |                                                | Gm397,Nkx2,Zfp691                                                              |

|            |      |          |                                                                        |                                            |                 |                                  |
|------------|------|----------|------------------------------------------------------------------------|--------------------------------------------|-----------------|----------------------------------|
| rs570613   | 0.61 | ESC, KID | ESC, ESDR, IPSC, BRST, BLD, SKIN, FAT, LIV, BRN, ADRL, PLCNT, MUS, VAS | ESDR,ESDR,ESC,IPSC,IPSC,MUS,VAS,SKIN       |                 | GR,Pbx3,SETDB1                   |
| rs568727   | 0.61 | ESC, KID | ESC, ESDR, IPSC, BRST, BLD, SKIN, FAT, ADRL, PLCNT, VAS                | ESC,IPSC,IPSC,BRST,BLD,ADRL,BRST,VAS,S KIN | POL2            | Maf,Nr2f2                        |
| rs10752126 | 0.7  | -        |                                                                        | ESC,ESC,IPSC,IPSC,BLD,ADRL,THYM,VAS        | POL2            |                                  |
| rs10905279 | 0.69 | -        |                                                                        | BLD,GI,MUS,VAS,SKIN                        | GATA2,GABP,POL2 | CEBPA                            |
| rs7897792  | 0.74 | -        | ESC, ESDR, IPSC, BRST, BLD, SKIN, FAT, THYM                            | VAS,SKIN                                   | POL2            | Foxp1,GATA,HDAC2,Pax-5,TATA,p300 |
| rs537544   | 0.62 | -        | ESC, ESDR, IPSC, BRST, BLD, SKIN, FAT, THYM                            | VAS                                        |                 | GR,Gfi1,Irf                      |
| rs3847417  | 0.81 | -        | BLD                                                                    |                                            |                 | GATA,GR,ZID                      |
| rs3802597  | 0.98 | -        | ESDR, ESC, IPSC, BRST, BLD, THYM, PLCNT, HRT, VAS                      | ESC,ESDR,ADRL,MUS,BRN                      | CMYC,POL2       | EBF,THAP1,YY1                    |
| rs10905284 | 1    | -        |                                                                        | ESDR,THYM,VAS                              |                 | DMRT2,YY1                        |
| rs34610379 | 0.67 | -        |                                                                        | PLCNT,SKIN                                 |                 | Dbx1,TATA                        |

Data from HaploReg v4.1 (<http://archive.broadinstitute.org/mammals/haploreg/haploreg.php>)

Supplementary Table 12: DeepSEA analyses of rs11603634 (*MUC5AC*) and proxies ( $r^2 > 0.4$ ) identifies potential alterations in Fox transcription factor activity for rs11603634 and alterations in several factors for rs12788104.

**(A) rs11603634**

| Chromatin feature | Cell Type | Treatment    | Log2 fold change | E-Value  |
|-------------------|-----------|--------------|------------------|----------|
| FOXA1             | HepG2     | None         | 1.6612           | 0.001328 |
| FOXA2             | HepG2     | None         | 1.6506           | 0.001216 |
| FOXA1             | HepG2     | None         | 1.643            | 0.001216 |
| FOXA1             | T-47D     | DMSO_0.02pct | 1.5325           | 0.000406 |
| DNase             | LNCaP     | androgen     | 1.348            | 0.006265 |

**(B) rs12788104 (r2 0.47 with rs11603634)**

| Chromatin feature | Cell Type | Treatment | Log2 fold change | E-Value  |
|-------------------|-----------|-----------|------------------|----------|
| GATA2             | K562      | None      | -5.2408          | 0.0001   |
| TAL1              | K562      | None      | -4.762           | 0.000089 |
| GATA2             | K562      | None      | -4.7             | 0.000026 |
| GATA1             | K562      | None      | -4.4207          | 0.000009 |
| p300              | K562      | None      | -4.1833          | 0.000545 |
| ZEB1              | GM12878   | None      | 1.8451           | 0.000787 |

*E* is short for 'Expect', and E-value is defined as the expected proportion of SNPs with larger predicted effect (from reference allele to alternative allele) for this chromatin feature. The predicted effect magnitude is measured as the product of relative and absolute change, i.e.  $|\log(p_{ref}/(1-p_{ref})) - \log(p_{alt}/(1-p_{alt}))| * |p_{ref} - p_{alt}|$ . E-value is computed based on the empirical distributions of predicted effects for 1000 Genomes SNPs.

Supplementary Table 13: DeepSEA analyses of rs10905284 (*GATA3*) and proxies ( $r^2 > 0.4$ ) identifies potential functional effects for rs10905284 and rs3802597.

**(A) rs10905284**

| Chromatin feature | Cell Type | Treatment | Log2 fold change | E-Value  |
|-------------------|-----------|-----------|------------------|----------|
| MafK              | HepG2     | None      | 0.80585          | 0.027291 |
| MafF              | HepG2     | None      | 0.77694          | 0.026661 |
| MafK              | HepG2     | None      | 0.77479          | 0.024518 |
| MafK              | IMR90     | None      | 0.70611          | 0.027451 |
| MafK              | K562      | None      | 0.61198          | 0.024304 |

**(B) rs3802597 (r2 0.93 with rs10905284)**

| Chromatin feature | Cell Type  | Treatment    | Log2 fold change | E-Value |
|-------------------|------------|--------------|------------------|---------|
| Max               | HUVEC      | None         | 2.0529           | 0.0028  |
| USF1              | SK-N-SH_RA | None         | 1.9338           | 0.0061  |
| USF2              | HepG2      | None         | 1.8769           | 0.0084  |
| USF1              | A549       | EtOH_0.02pct | 1.8565           | 0.0064  |
| USF1              | HepG2      | None         | 1.8417           | 0.0037  |

*E* is short for 'Expect', and E-value is defined as the expected proportion of SNPs with larger predicted effect (from reference allele to alternative allele) for this chromatin feature. The predicted effect magnitude is measured as the product of relative and absolute change, i.e.  $|\log(p_{ref}/(1-p_{ref})) - \log(p_{alt}/(1-p_{alt}))| * |p_{ref} - p_{alt}|$ . E-value is computed based on the empirical distributions of predicted effects for 1000 Genomes SNPs.

Supplementary Table 14: DeepSEA analyses of rs560026225 (*KIAA1109*) and proxies ( $r^2 > 0.4$ ) identifies potential functional effects for rs17389644.

**(A) rs17389644 (r2 0.57 with rs560026225)**

| Chromatin feature | Cell Type     | Treatment | Log2 fold change | E-Value  |
|-------------------|---------------|-----------|------------------|----------|
| DNase             | HMVEC-dBI-Ad  | None      | 1.9371           | 0.000929 |
| DNase             | HPAEC         | None      | 1.8865           | 0.000845 |
| DNase             | HMVEC-dLy-Neo | None      | 1.8511           | 0.000955 |
| DNase             | HMVEC-LBI     | None      | 1.8486           | 0.001183 |
| Pol2-4H8          | HUVEC         | None      | 1.8327           | 0.000344 |

*E* is short for 'Expect', and *E*-value is defined as the expected proportion of SNPs with larger predicted effect (from reference allele to alternative allele) for this chromatin feature. The predicted effect magnitude is measured as the product of relative and absolute change, i.e.  $|\log(p_{ref}/(1-p_{ref})) - \log(p_{alt}/(1-p_{alt}))| * |p_{ref} - p_{alt}|$ . *E*-value is computed based on the empirical distributions of predicted effects for 1000 Genomes SNPs.
